# Supplementary material for: Density-dependent coral recruitment displays divergent responses during distinct early life-history stages
Source: PubMed Central journal article supplement (PMC5451816; doi:10.1098/rsos.170082), 2017-05-17
Supplement: rsos170082supp1.pdf [file rsos170082supp1.pdf]

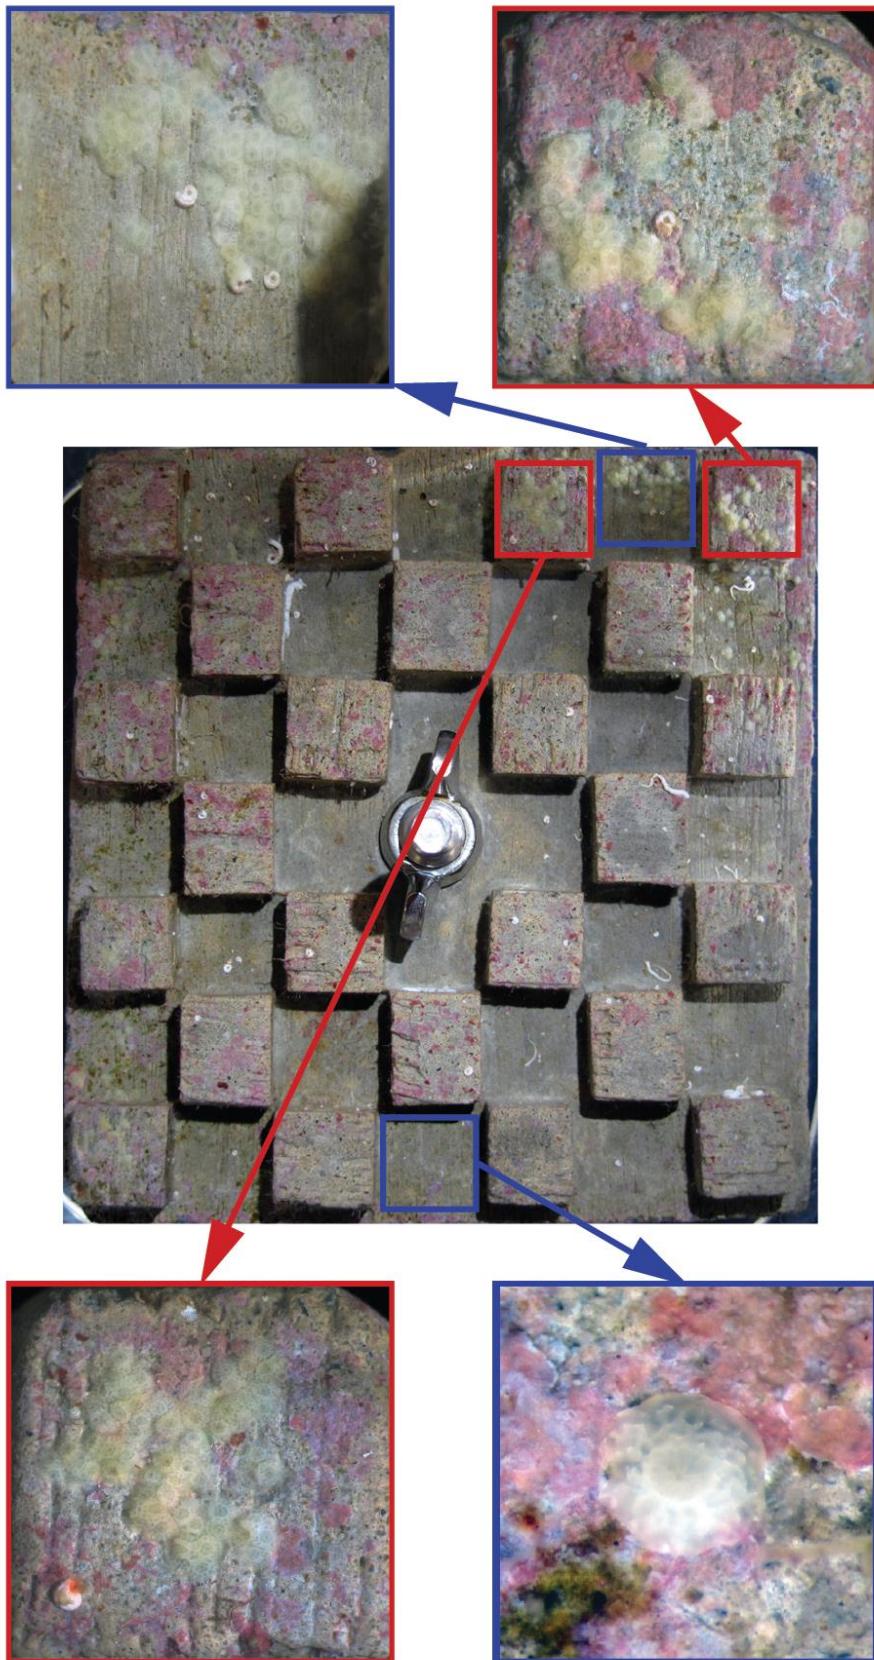

**Figure S1** An example custom made settlement tile with newly settled *Acropora millepora* recruits that are singular or aggregated on exposed (red borders) and crevice (blue borders) microhabitats.
