# Supplementary material for: Density-dependent coral recruitment displays divergent responses during distinct early life-history stages
Source: PubMed Central journal article supplement (PMC5451816; doi:10.1098/rsos.170082), 2017-05-17
Supplement: rsos170082supp2.pdf [file rsos170082supp2.pdf]

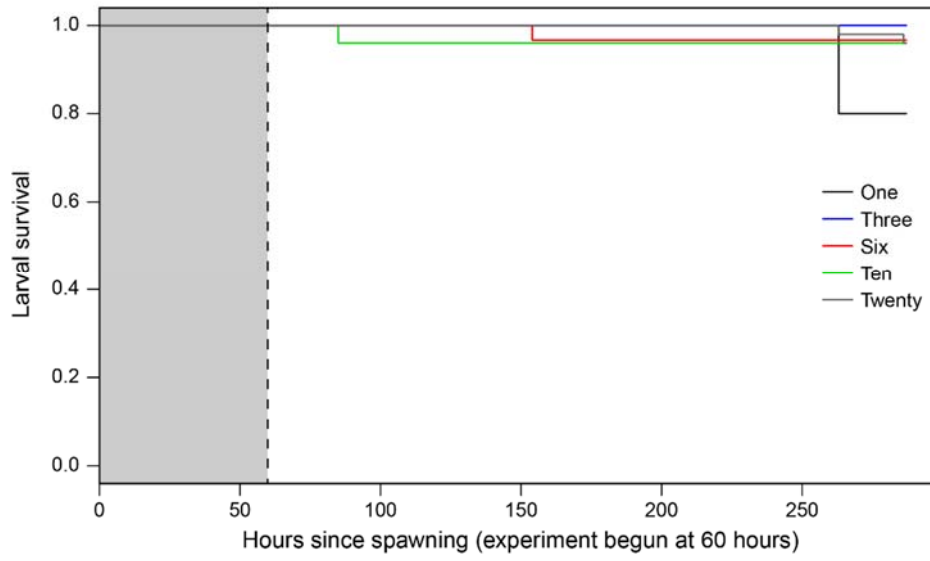

**Figure S2** Proportional survival of *Acropora millepora* larvae from 60 to 288 hours following spawning as a function of larval density.
