# Supplementary material for: Density-dependent coral recruitment displays divergent responses during distinct early life-history stages
Source: R Soc Open Sci. 2017 May 17;4(5):170082. doi: 10.1098/rsos.170082 (PMC5451816; doi:10.1098/rsos.170082)
Supplement: Table S1 [file rsos170082supp3.xlsx]

## Sheet: larvalsurvival
LarvalTreatment	LarvalDensity	TankNumber	60	85	107	130	154	210	263	286	whydied	Totalhours
aOne	1	1	1	1	1	1	1	1	1	1	alive	287
aOne	1	2	1	1	1	1	1	1	1	1	alive	287
aOne	1	3	1	1	1	1	1	1	1	1	alive	287
aOne	1	4	1	1	1	1	1	1	1	1	alive	287
aOne	1	5	1	1	1	1	1	1	0	0	dead	263
bThree	3	7	1	1	1	1	1	1	1	1	alive	287
bThree	3	7	1	1	1	1	1	1	1	1	alive	287
bThree	3	7	1	1	1	1	1	1	1	1	alive	287
bThree	3	8	1	1	1	1	1	1	1	1	alive	287
bThree	3	8	1	1	1	1	1	1	1	1	alive	287
bThree	3	8	1	1	1	1	1	1	1	1	alive	287
bThree	3	9	1	1	1	1	1	1	1	1	alive	287
bThree	3	9	1	1	1	1	1	1	1	1	alive	287
bThree	3	9	1	1	1	1	1	1	1	1	alive	287
bThree	3	10	1	1	1	1	1	1	1	1	alive	287
bThree	3	10	1	1	1	1	1	1	1	1	alive	287
bThree	3	10	1	1	1	1	1	1	1	1	alive	287
bThree	3	11	1	1	1	1	1	1	1	1	alive	287
bThree	3	11	1	1	1	1	1	1	1	1	alive	287
bThree	3	11	1	1	1	1	1	1	1	1	alive	287
cSix	6	13	1	1	1	1	1	1	1	1	alive	287
cSix	6	13	1	1	1	1	1	1	1	1	alive	287
cSix	6	13	1	1	1	1	1	1	1	1	alive	287
cSix	6	13	1	1	1	1	1	1	1	1	alive	287
cSix	6	13	1	1	1	1	1	1	1	1	alive	287
cSix	6	13	1	1	1	1	1	1	1	1	alive	287
cSix	6	14	1	1	1	1	1	1	1	1	alive	287
cSix	6	14	1	1	1	1	1	1	1	1	alive	287
cSix	6	14	1	1	1	1	1	1	1	1	alive	287
cSix	6	14	1	1	1	1	1	1	1	1	alive	287
cSix	6	14	1	1	1	1	1	1	1	1	alive	287
cSix	6	14	1	1	1	1	1	1	1	1	alive	287
cSix	6	15	1	1	1	1	1	1	1	1	alive	287
cSix	6	15	1	1	1	1	1	1	1	1	alive	287
cSix	6	15	1	1	1	1	1	1	1	1	alive	287
cSix	6	15	1	1	1	1	1	1	1	1	alive	287
cSix	6	15	1	1	1	1	1	1	1	1	alive	287
cSix	6	15	1	1	1	1	1	1	1	1	alive	287
cSix	6	16	1	1	1	1	1	1	1	1	alive	287
cSix	6	16	1	1	1	1	1	1	1	1	alive	287
cSix	6	16	1	1	1	1	1	1	1	1	alive	287
cSix	6	16	1	1	1	1	1	1	1	1	alive	287
cSix	6	16	1	1	1	1	1	1	1	1	alive	287
cSix	6	16	1	1	1	1	1	1	1	1	alive	287
cSix	6	17	1	1	1	1	1	1	1	1	alive	287
cSix	6	17	1	1	1	1	1	1	1	1	alive	287
cSix	6	17	1	1	1	1	1	1	1	1	alive	287
cSix	6	17	1	1	1	1	1	1	1	1	alive	287
cSix	6	17	1	1	1	1	1	1	1	1	alive	287
cSix	6	17	1	1	1	1	0	0	0	0	dead	154
dTen	10	19	1	1	1	1	1	1	1	1	alive	287
dTen	10	19	1	1	1	1	1	1	1	1	alive	287
dTen	10	19	1	1	1	1	1	1	1	1	alive	287
dTen	10	19	1	1	1	1	1	1	1	1	alive	287
dTen	10	19	1	1	1	1	1	1	1	1	alive	287
dTen	10	19	1	1	1	1	1	1	1	1	alive	287
dTen	10	19	1	1	1	1	1	1	1	1	alive	287
dTen	10	19	1	1	1	1	1	1	1	1	alive	287
dTen	10	19	1	1	1	1	1	1	1	1	alive	287
dTen	10	19	1	1	1	1	1	1	1	1	alive	287
dTen	10	20	1	1	1	1	1	1	1	1	alive	287
dTen	10	20	1	1	1	1	1	1	1	1	alive	287
dTen	10	20	1	1	1	1	1	1	1	1	alive	287
dTen	10	20	1	1	1	1	1	1	1	1	alive	287
dTen	10	20	1	1	1	1	1	1	1	1	alive	287
dTen	10	20	1	1	1	1	1	1	1	1	alive	287
dTen	10	20	1	1	1	1	1	1	1	1	alive	287
dTen	10	20	1	1	1	1	1	1	1	1	alive	287
dTen	10	20	1	1	1	1	1	1	1	1	alive	287
dTen	10	20	1	1	1	1	1	1	1	1	alive	287
dTen	10	21	1	1	1	1	1	1	1	1	alive	287
dTen	10	21	1	1	1	1	1	1	1	1	alive	287
dTen	10	21	1	1	1	1	1	1	1	1	alive	287
dTen	10	21	1	1	1	1	1	1	1	1	alive	287
dTen	10	21	1	1	1	1	1	1	1	1	alive	287
dTen	10	21	1	1	1	1	1	1	1	1	alive	287
dTen	10	21	1	1	1	1	1	1	1	1	alive	287
dTen	10	21	1	1	1	1	1	1	1	1	alive	287
dTen	10	21	1	1	1	1	1	1	1	1	alive	287
dTen	10	21	1	1	1	1	1	1	1	1	alive	287
dTen	10	22	1	1	1	1	1	1	1	1	alive	287
dTen	10	22	1	1	1	1	1	1	1	1	alive	287
dTen	10	22	1	1	1	1	1	1	1	1	alive	287
dTen	10	22	1	1	1	1	1	1	1	1	alive	287
dTen	10	22	1	1	1	1	1	1	1	1	alive	287
dTen	10	22	1	1	1	1	1	1	1	1	alive	287
dTen	10	22	1	1	1	1	1	1	1	1	alive	287
dTen	10	22	1	1	1	1	1	1	1	1	alive	287
dTen	10	22	1	1	1	1	1	1	1	1	alive	287
dTen	10	22	1	1	1	1	1	1	1	1	alive	287
dTen	10	23	1	1	1	1	1	1	1	1	alive	287
dTen	10	23	1	1	1	1	1	1	1	1	alive	287
dTen	10	23	1	1	1	1	1	1	1	1	alive	287
dTen	10	23	1	1	1	1	1	1	1	1	alive	287
dTen	10	23	1	1	1	1	1	1	1	1	alive	287
dTen	10	23	1	1	1	1	1	1	1	1	alive	287
dTen	10	23	1	1	1	1	1	1	1	1	alive	287
dTen	10	23	1	1	1	1	1	1	1	1	alive	287
dTen	10	23	1	0	0	0	0	0	0	0	dead	85
dTen	10	23	1	0	0	0	0	0	0	0	dead	85
eTwenty	20	25	1	1	1	1	1	1	1	1	alive	287
eTwenty	20	25	1	1	1	1	1	1	1	1	alive	287
eTwenty	20	25	1	1	1	1	1	1	1	1	alive	287
eTwenty	20	25	1	1	1	1	1	1	1	1	alive	287
eTwenty	20	25	1	1	1	1	1	1	1	1	alive	287
eTwenty	20	25	1	1	1	1	1	1	1	1	alive	287
eTwenty	20	25	1	1	1	1	1	1	1	1	alive	287
eTwenty	20	25	1	1	1	1	1	1	1	1	alive	287
eTwenty	20	25	1	1	1	1	1	1	1	1	alive	287
eTwenty	20	25	1	1	1	1	1	1	1	1	alive	287
eTwenty	20	25	1	1	1	1	1	1	1	1	alive	287
eTwenty	20	25	1	1	1	1	1	1	1	1	alive	287
eTwenty	20	25	1	1	1	1	1	1	1	1	alive	287
eTwenty	20	25	1	1	1	1	1	1	1	1	alive	287
eTwenty	20	25	1	1	1	1	1	1	1	1	alive	287
eTwenty	20	25	1	1	1	1	1	1	1	1	alive	287
eTwenty	20	25	1	1	1	1	1	1	1	1	alive	287
eTwenty	20	25	1	1	1	1	1	1	1	1	alive	287
eTwenty	20	25	1	1	1	1	1	1	1	1	alive	287
eTwenty	20	25	1	1	1	1	1	1	1	1	alive	287
eTwenty	20	26	1	1	1	1	1	1	1	1	alive	287
eTwenty	20	26	1	1	1	1	1	1	1	1	alive	287
eTwenty	20	26	1	1	1	1	1	1	1	1	alive	287
eTwenty	20	26	1	1	1	1	1	1	1	1	alive	287
eTwenty	20	26	1	1	1	1	1	1	1	1	alive	287
eTwenty	20	26	1	1	1	1	1	1	1	1	alive	287
eTwenty	20	26	1	1	1	1	1	1	1	1	alive	287
eTwenty	20	26	1	1	1	1	1	1	1	1	alive	287
eTwenty	20	26	1	1	1	1	1	1	1	1	alive	287
eTwenty	20	26	1	1	1	1	1	1	1	1	alive	287
eTwenty	20	26	1	1	1	1	1	1	1	1	alive	287
eTwenty	20	26	1	1	1	1	1	1	1	1	alive	287
eTwenty	20	26	1	1	1	1	1	1	1	1	alive	287
eTwenty	20	26	1	1	1	1	1	1	1	1	alive	287
eTwenty	20	26	1	1	1	1	1	1	1	1	alive	287
eTwenty	20	26	1	1	1	1	1	1	1	1	alive	287
eTwenty	20	26	1	1	1	1	1	1	1	1	alive	287
eTwenty	20	26	1	1	1	1	1	1	1	1	alive	287
eTwenty	20	26	1	1	1	1	1	1	1	0	dead	286
eTwenty	20	26	1	1	1	1	1	1	0	0	dead	263
eTwenty	20	27	1	1	1	1	1	1	1	1	alive	287
eTwenty	20	27	1	1	1	1	1	1	1	1	alive	287
eTwenty	20	27	1	1	1	1	1	1	1	1	alive	287
eTwenty	20	27	1	1	1	1	1	1	1	1	alive	287
eTwenty	20	27	1	1	1	1	1	1	1	1	alive	287
eTwenty	20	27	1	1	1	1	1	1	1	1	alive	287
eTwenty	20	27	1	1	1	1	1	1	1	1	alive	287
eTwenty	20	27	1	1	1	1	1	1	1	1	alive	287
eTwenty	20	27	1	1	1	1	1	1	1	1	alive	287
eTwenty	20	27	1	1	1	1	1	1	1	1	alive	287
eTwenty	20	27	1	1	1	1	1	1	1	1	alive	287
eTwenty	20	27	1	1	1	1	1	1	1	1	alive	287
eTwenty	20	27	1	1	1	1	1	1	1	1	alive	287
eTwenty	20	27	1	1	1	1	1	1	1	1	alive	287
eTwenty	20	27	1	1	1	1	1	1	1	1	alive	287
eTwenty	20	27	1	1	1	1	1	1	1	1	alive	287
eTwenty	20	27	1	1	1	1	1	1	1	1	alive	287
eTwenty	20	27	1	1	1	1	1	1	1	1	alive	287
eTwenty	20	27	1	1	1	1	1	1	1	1	alive	287
eTwenty	20	27	1	1	1	1	1	1	0	0	dead	263
eTwenty	20	28	1	1	1	1	1	1	1	1	alive	287
eTwenty	20	28	1	1	1	1	1	1	1	1	alive	287
eTwenty	20	28	1	1	1	1	1	1	1	1	alive	287
eTwenty	20	28	1	1	1	1	1	1	1	1	alive	287
eTwenty	20	28	1	1	1	1	1	1	1	1	alive	287
eTwenty	20	28	1	1	1	1	1	1	1	1	alive	287
eTwenty	20	28	1	1	1	1	1	1	1	1	alive	287
eTwenty	20	28	1	1	1	1	1	1	1	1	alive	287
eTwenty	20	28	1	1	1	1	1	1	1	1	alive	287
eTwenty	20	28	1	1	1	1	1	1	1	1	alive	287
eTwenty	20	28	1	1	1	1	1	1	1	1	alive	287
eTwenty	20	28	1	1	1	1	1	1	1	1	alive	287
eTwenty	20	28	1	1	1	1	1	1	1	1	alive	287
eTwenty	20	28	1	1	1	1	1	1	1	1	alive	287
eTwenty	20	28	1	1	1	1	1	1	1	1	alive	287
eTwenty	20	28	1	1	1	1	1	1	1	1	alive	287
eTwenty	20	28	1	1	1	1	1	1	1	1	alive	287
eTwenty	20	28	1	1	1	1	1	1	1	1	alive	287
eTwenty	20	28	1	1	1	1	1	1	1	1	alive	287
eTwenty	20	28	1	1	1	1	1	1	1	0	dead	286
eTwenty	20	29	1	1	1	1	1	1	1	1	alive	287
eTwenty	20	29	1	1	1	1	1	1	1	1	alive	287
eTwenty	20	29	1	1	1	1	1	1	1	1	alive	287
eTwenty	20	29	1	1	1	1	1	1	1	1	alive	287
eTwenty	20	29	1	1	1	1	1	1	1	1	alive	287
eTwenty	20	29	1	1	1	1	1	1	1	1	alive	287
eTwenty	20	29	1	1	1	1	1	1	1	1	alive	287
eTwenty	20	29	1	1	1	1	1	1	1	1	alive	287
eTwenty	20	29	1	1	1	1	1	1	1	1	alive	287
eTwenty	20	29	1	1	1	1	1	1	1	1	alive	287
eTwenty	20	29	1	1	1	1	1	1	1	1	alive	287
eTwenty	20	29	1	1	1	1	1	1	1	1	alive	287
eTwenty	20	29	1	1	1	1	1	1	1	1	alive	287
eTwenty	20	29	1	1	1	1	1	1	1	1	alive	287
eTwenty	20	29	1	1	1	1	1	1	1	1	alive	287
eTwenty	20	29	1	1	1	1	1	1	1	1	alive	287
eTwenty	20	29	1	1	1	1	1	1	1	1	alive	287
eTwenty	20	29	1	1	1	1	1	1	1	1	alive	287
eTwenty	20	29	1	1	1	1	1	1	1	1	alive	287
eTwenty	20	29	1	1	1	1	1	1	1	1	alive	287

## Sheet: larvalsettlement
LarvalDensity	TankNumber	LarvalSettlement
1	1	0
1	2	1
1	3	0
1	4	0
1	5	1
3	7	1
3	7	1
3	7	1
3	8	0
3	8	0
3	8	0
3	9	0
3	9	0
3	9	0
3	10	0
3	10	0
3	10	0
3	11	1
3	11	1
3	11	1
6	13	1
6	13	1
6	13	1
6	13	1
6	13	0
6	13	0
6	14	1
6	14	1
6	14	0
6	14	0
6	14	0
6	14	0
6	15	1
6	15	1
6	15	1
6	15	0
6	15	0
6	15	0
6	16	1
6	16	1
6	16	1
6	16	1
6	16	0
6	16	0
6	17	1
6	17	1
6	17	1
6	17	1
6	17	0
6	17	0
10	19	1
10	19	0
10	19	0
10	19	0
10	19	0
10	19	0
10	19	0
10	19	0
10	19	0
10	19	0
10	20	1
10	20	1
10	20	1
10	20	0
10	20	0
10	20	0
10	20	0
10	20	0
10	20	0
10	20	0
10	21	1
10	21	1
10	21	1
10	21	1
10	21	1
10	21	1
10	21	0
10	21	0
10	21	0
10	21	0
10	22	1
10	22	1
10	22	1
10	22	1
10	22	0
10	22	0
10	22	0
10	22	0
10	22	0
10	22	0
10	23	1
10	23	1
10	23	1
10	23	1
10	23	1
10	23	1
10	23	1
10	23	1
10	23	1
10	23	1
20	25	1
20	25	1
20	25	1
20	25	1
20	25	1
20	25	1
20	25	1
20	25	1
20	25	1
20	25	1
20	25	1
20	25	0
20	25	0
20	25	0
20	25	0
20	25	0
20	25	0
20	25	0
20	25	0
20	25	0
20	26	1
20	26	1
20	26	1
20	26	1
20	26	1
20	26	1
20	26	1
20	26	1
20	26	1
20	26	1
20	26	1
20	26	1
20	26	1
20	26	1
20	26	1
20	26	1
20	26	0
20	26	0
20	26	0
20	26	0
20	27	1
20	27	0
20	27	0
20	27	0
20	27	0
20	27	0
20	27	0
20	27	0
20	27	0
20	27	0
20	27	0
20	27	0
20	27	0
20	27	0
20	27	0
20	27	0
20	27	0
20	27	0
20	27	0
20	27	0
20	28	1
20	28	1
20	28	1
20	28	1
20	28	1
20	28	1
20	28	1
20	28	1
20	28	1
20	28	1
20	28	1
20	28	1
20	28	0
20	28	0
20	28	0
20	28	0
20	28	0
20	28	0
20	28	0
20	28	0
20	29	1
20	29	1
20	29	1
20	29	1
20	29	1
20	29	1
20	29	1
20	29	1
20	29	1
20	29	1
20	29	0
20	29	0
20	29	0
20	29	0
20	29	0
20	29	0
20	29	0
20	29	0
20	29	0
20	29	0
50	30	1
50	30	1
50	30	1
50	30	1
50	30	1
50	30	1
50	30	1
50	30	1
50	30	1
50	30	1
50	30	1
50	30	1
50	30	1
50	30	1
50	30	1
50	30	1
50	30	1
50	30	1
50	30	1
50	30	1
50	30	1
50	30	1
50	30	1
50	30	1
50	30	1
50	30	1
50	30	1
50	30	1
50	30	1
50	30	1
50	30	1
50	30	1
50	30	1
50	30	1
50	30	1
50	30	1
50	30	1
50	30	1
50	30	1
50	30	1
50	30	1
50	30	1
50	30	1
50	30	1
50	30	1
50	30	1
50	30	1
50	30	1
50	30	0
50	30	0
50	31	1
50	31	1
50	31	1
50	31	1
50	31	1
50	31	1
50	31	1
50	31	1
50	31	1
50	31	1
50	31	1
50	31	1
50	31	1
50	31	1
50	31	1
50	31	1
50	31	1
50	31	1
50	31	1
50	31	1
50	31	1
50	31	1
50	31	1
50	31	1
50	31	1
50	31	1
50	31	1
50	31	1
50	31	1
50	31	1
50	31	1
50	31	1
50	31	1
50	31	1
50	31	1
50	31	1
50	31	1
50	31	1
50	31	1
50	31	1
50	31	1
50	31	1
50	31	1
50	31	1
50	31	1
50	31	1
50	31	1
50	31	1
50	31	0
50	31	0
50	32	1
50	32	1
50	32	1
50	32	1
50	32	1
50	32	1
50	32	1
50	32	1
50	32	1
50	32	1
50	32	1
50	32	1
50	32	1
50	32	1
50	32	1
50	32	1
50	32	1
50	32	1
50	32	1
50	32	1
50	32	1
50	32	1
50	32	1
50	32	1
50	32	1
50	32	1
50	32	1
50	32	1
50	32	1
50	32	1
50	32	1
50	32	1
50	32	1
50	32	1
50	32	1
50	32	1
50	32	1
50	32	1
50	32	1
50	32	1
50	32	1
50	32	1
50	32	1
50	32	1
50	32	1
50	32	0
50	32	0
50	32	0
50	32	0
50	32	0
50	33	1
50	33	1
50	33	1
50	33	1
50	33	1
50	33	1
50	33	1
50	33	1
50	33	1
50	33	1
50	33	1
50	33	1
50	33	1
50	33	1
50	33	1
50	33	1
50	33	1
50	33	1
50	33	1
50	33	1
50	33	1
50	33	1
50	33	1
50	33	1
50	33	1
50	33	1
50	33	1
50	33	1
50	33	1
50	33	1
50	33	1
50	33	1
50	33	1
50	33	1
50	33	1
50	33	1
50	33	1
50	33	0
50	33	0
50	33	0
50	33	0
50	33	0
50	33	0
50	33	0
50	33	0
50	33	0
50	33	0
50	33	0
50	33	0
50	33	0
50	34	1
50	34	1
50	34	1
50	34	1
50	34	1
50	34	1
50	34	0
50	34	0
50	34	0
50	34	0
50	34	0
50	34	0
50	34	0
50	34	0
50	34	0
50	34	0
50	34	0
50	34	0
50	34	0
50	34	0
50	34	0
50	34	0
50	34	0
50	34	0
50	34	0
50	34	0
50	34	0
50	34	0
50	34	0
50	34	0
50	34	0
50	34	0
50	34	0
50	34	0
50	34	0
50	34	0
50	34	0
50	34	0
50	34	0
50	34	0
50	34	0
50	34	0
50	34	0
50	34	0
50	34	0
50	34	0
50	34	0
50	34	0
50	34	0
50	34	0

## Sheet: postsettlementsurvival
DateScoredT1	DateDeployedT1	DateScoredT2	Site	TileNumber	Microhabitat	X_coordinate	Y_coordinate	Repeat	Aggregation	SettlerAbundT1	SettlerAbundT2	SettlerSurv	Tile_cover	CCA_cover	Turf_cover	Sediment_cover	EFA_cover	MA_cover	Invert_cover
2016-04-11	2016-04-12	2016-05-14	Bund2	151	crevice	a	a	1	0	0	0	0	0	80	10	0	10	0	0
2016-04-11	2016-04-12	2016-05-14	Bund2	151	crevice	a	b	1	1	52	0	0	0	80	10	0	10	0	0
2016-04-11	2016-04-12	2016-05-14	Bund2	151	crevice	a	c	1	0	0	0	0	0	80	10	0	10	0	0
2016-04-11	2016-04-12	2016-05-14	Bund2	151	crevice	a	d	1	1	28	0	0	0	80	10	0	10	0	0
2016-04-11	2016-04-12	2016-05-14	Bund2	151	crevice	a	e	1	0	0	0	0	0	80	10	0	10	0	0
2016-04-11	2016-04-12	2016-05-14	Bund2	151	crevice	a	f	1	1	105	0	0	0	80	10	0	10	0	0
2016-04-11	2016-04-12	2016-05-14	Bund2	151	crevice	a	g	1	0	0	0	0	0	80	10	0	10	0	0
2016-04-11	2016-04-12	2016-05-14	Bund2	151	crevice	a	h	1	1	39	0	0	0	80	10	0	10	0	0
2016-04-11	2016-04-12	2016-05-14	Bund2	151	crevice	a	i	1	0	0	0	0	0	80	10	0	10	0	0
2016-04-11	2016-04-12	2016-05-14	Bund2	151	crevice	b	a	1	1	2	2	1	0	80	10	0	10	0	0
2016-04-11	2016-04-12	2016-05-14	Bund2	151	exposed	b	b	1	1	2	0	0	0	80	5	0	15	0	0
2016-04-11	2016-04-12	2016-05-14	Bund2	151	exposed	b	b	2	0	1	0	0	0	80	5	0	15	0	0
2016-04-11	2016-04-12	2016-05-14	Bund2	151	crevice	b	c	1	1	75	0	0	0	5	45	45	5	0	0
2016-04-11	2016-04-12	2016-05-14	Bund2	151	crevice	b	c	2	0	1	0	0	0	5	45	45	5	0	0
2016-04-11	2016-04-12	2016-05-14	Bund2	151	crevice	b	c	3	1	73	0	0	0	5	45	45	5	0	0
2016-04-11	2016-04-12	2016-05-14	Bund2	151	exposed	b	d	1	1	4	0	0	0	80	5	0	15	0	0
2016-04-11	2016-04-12	2016-05-14	Bund2	151	exposed	b	d	2	1	3	0	0	0	80	5	0	15	0	0
2016-04-11	2016-04-12	2016-05-14	Bund2	151	exposed	b	d	3	1	4	0	0	0	80	5	0	15	0	0
2016-04-11	2016-04-12	2016-05-14	Bund2	151	exposed	b	d	4	1	4	0	0	0	80	5	0	15	0	0
2016-04-11	2016-04-12	2016-05-14	Bund2	151	exposed	b	d	5	1	2	0	0	0	80	5	0	15	0	0
2016-04-11	2016-04-12	2016-05-14	Bund2	151	exposed	b	d	6	1	3	0	0	0	80	5	0	15	0	0
2016-04-11	2016-04-12	2016-05-14	Bund2	151	crevice	b	e	1	1	87	0	0	5	5	40	40	10	0	0
2016-04-11	2016-04-12	2016-05-14	Bund2	151	exposed	b	f	1	0	1	0	0	0	80	5	0	15	0	0
2016-04-11	2016-04-12	2016-05-14	Bund2	151	crevice	b	g	1	1	187	0	0	0	5	45	45	5	0	0
2016-04-11	2016-04-12	2016-05-14	Bund2	151	exposed	b	h	1	0	0	0	0	0	90	0	0	10	0	0
2016-04-11	2016-04-12	2016-05-14	Bund2	151	crevice	b	i	1	0	0	0	0	0	50	20	0	30	0	0
2016-04-11	2016-04-12	2016-05-14	Bund2	151	crevice	c	a	1	0	0	0	0	0	60	20	0	20	0	0
2016-04-11	2016-04-12	2016-05-14	Bund2	151	crevice	c	b	1	1	75	0	0	0	5	45	45	5	0	0
2016-04-11	2016-04-12	2016-05-14	Bund2	151	exposed	c	c	1	1	6	0	0	5	75	0	0	20	0	0
2016-04-11	2016-04-12	2016-05-14	Bund2	151	exposed	c	c	2	1	6	0	0	5	75	0	0	20	0	0
2016-04-11	2016-04-12	2016-05-14	Bund2	151	crevice	c	d	1	1	55	0	0	0	0	50	50	0	0	0
2016-04-11	2016-04-12	2016-05-14	Bund2	151	exposed	c	e	1	0	0	0	0	5	80	0	0	15	0	0
2016-04-11	2016-04-12	2016-05-14	Bund2	151	crevice	c	f	1	1	38	0	0	0	0	50	50	0	0	0
2016-04-11	2016-04-12	2016-05-14	Bund2	151	exposed	c	g	1	1	6	0	0	0	85	0	0	15	0	0
2016-04-11	2016-04-12	2016-05-14	Bund2	151	exposed	c	g	2	1	6	0	0	0	85	0	0	15	0	0
2016-04-11	2016-04-12	2016-05-14	Bund2	151	crevice	c	h	1	1	37	0	0	0	0	45	45	10	0	0
2016-04-11	2016-04-12	2016-05-14	Bund2	151	crevice	c	i	1	0	0	0	0	0	50	0	0	50	0	0
2016-04-11	2016-04-12	2016-05-14	Bund2	151	crevice	d	a	1	0	0	0	0	0	60	20	0	20	0	0
2016-04-11	2016-04-12	2016-05-14	Bund2	151	exposed	d	b	1	1	33	0	0	0	50	0	0	50	0	0
2016-04-11	2016-04-12	2016-05-14	Bund2	151	exposed	d	b	2	1	4	0	0	0	50	0	0	50	0	0
2016-04-11	2016-04-12	2016-05-14	Bund2	151	crevice	d	c	1	1	18	3	1	0	0	50	50	0	0	0
2016-04-11	2016-04-12	2016-05-14	Bund2	151	crevice	d	c	2	1	20	2	1	0	0	50	50	0	0	0
2016-04-11	2016-04-12	2016-05-14	Bund2	151	exposed	d	d	1	0	0	0	0	0	70	0	0	30	0	0
2016-04-11	2016-04-12	2016-05-14	Bund2	151	crevice	d	e	1	0	1	0	0	0	0	50	50	0	0	0
2016-04-11	2016-04-12	2016-05-14	Bund2	151	crevice	d	e	2	0	1	0	0	0	0	50	50	0	0	0
2016-04-11	2016-04-12	2016-05-14	Bund2	151	crevice	d	e	3	0	1	0	0	0	0	50	50	0	0	0
2016-04-11	2016-04-12	2016-05-14	Bund2	151	crevice	d	e	4	1	5	0	0	0	0	50	50	0	0	0
2016-04-11	2016-04-12	2016-05-14	Bund2	151	exposed	d	f	1	1	5	0	0	0	80	0	0	20	0	0
2016-04-11	2016-04-12	2016-05-14	Bund2	151	crevice	d	g	1	0	1	0	0	0	0	50	50	0	0	0
2016-04-11	2016-04-12	2016-05-14	Bund2	151	crevice	d	g	2	0	1	0	0	0	0	50	50	0	0	0
2016-04-11	2016-04-12	2016-05-14	Bund2	151	crevice	d	g	3	1	2	0	0	0	0	50	50	0	0	0
2016-04-11	2016-04-12	2016-05-14	Bund2	151	exposed	d	h	1	0	0	0	0	0	80	5	0	15	0	0
2016-04-11	2016-04-12	2016-05-14	Bund2	151	crevice	d	i	1	0	1	0	0	0	80	0	0	20	0	0
2016-04-11	2016-04-12	2016-05-14	Bund2	151	crevice	e	a	1	0	0	0	0	0	70	10	0	20	0	0
2016-04-11	2016-04-12	2016-05-14	Bund2	151	crevice	e	b	1	1	97	0	0	0	0	50	50	0	0	0
2016-04-11	2016-04-12	2016-05-14	Bund2	151	exposed	e	c	1	0	0	0	0	0	45	5	5	45	0	0
2016-04-11	2016-04-12	2016-05-14	Bund2	151	crevice	e	d	1	0	0	0	0	0	0	40	60	0	0	0
2016-04-11	2016-04-12	2016-05-14	Bund2	151	crevice	e	f	1	0	0	0	0	0	0	40	60	0	0	0
2016-04-11	2016-04-12	2016-05-14	Bund2	151	exposed	e	g	1	0	0	0	0	0	60	0	0	35	5	0
2016-04-11	2016-04-12	2016-05-14	Bund2	151	crevice	e	h	1	0	0	0	0	0	5	40	55	0	0	0
2016-04-11	2016-04-12	2016-05-14	Bund2	151	crevice	e	i	1	0	0	0	0	0	70	20	5	5	0	0
2016-04-11	2016-04-12	2016-05-14	Bund2	151	crevice	f	a	1	1	17	0	0	0	50	50	0	0	0	0
2016-04-11	2016-04-12	2016-05-14	Bund2	151	exposed	f	b	1	1	5	0	0	0	80	0	0	20	0	0
2016-04-11	2016-04-12	2016-05-14	Bund2	151	crevice	f	c	1	0	1	0	0	0	0	40	60	0	0	0
2016-04-11	2016-04-12	2016-05-14	Bund2	151	crevice	f	c	2	0	1	0	0	0	0	40	60	0	0	0
2016-04-11	2016-04-12	2016-05-14	Bund2	151	crevice	f	c	3	0	1	0	0	0	0	40	60	0	0	0
2016-04-11	2016-04-12	2016-05-14	Bund2	151	crevice	f	c	4	1	2	0	0	0	0	40	60	0	0	0
2016-04-11	2016-04-12	2016-05-14	Bund2	151	crevice	f	c	5	0	1	0	0	0	0	40	60	0	0	0
2016-04-11	2016-04-12	2016-05-14	Bund2	151	exposed	f	d	1	0	0	0	0	0	60	0	0	40	0	0
2016-04-11	2016-04-12	2016-05-14	Bund2	151	crevice	f	e	1	0	1	0	0	0	0	40	60	0	0	0
2016-04-11	2016-04-12	2016-05-14	Bund2	151	crevice	f	e	2	0	1	0	0	0	0	40	60	0	0	0
2016-04-11	2016-04-12	2016-05-14	Bund2	151	crevice	f	e	3	1	2	0	0	0	0	40	60	0	0	0
2016-04-11	2016-04-12	2016-05-14	Bund2	151	exposed	f	f	1	1	4	0	0	0	50	0	0	50	0	0
2016-04-11	2016-04-12	2016-05-14	Bund2	151	crevice	f	g	1	1	2	0	0	0	0	50	45	0	5	0
2016-04-11	2016-04-12	2016-05-14	Bund2	151	exposed	f	h	1	0	0	0	0	0	50	0	0	0	50	0
2016-04-11	2016-04-12	2016-05-14	Bund2	151	crevice	f	i	1	0	0	0	0	0	70	20	5	5	0	0
2016-04-11	2016-04-12	2016-05-14	Bund2	151	crevice	g	a	1	0	0	0	0	0	40	10	0	50	0	0
2016-04-11	2016-04-12	2016-05-14	Bund2	151	crevice	g	b	1	1	100	0	0	0	5	30	55	10	0	0
2016-04-11	2016-04-12	2016-05-14	Bund2	151	exposed	g	c	1	0	0	0	0	0	40	5	5	50	0	0
2016-04-11	2016-04-12	2016-05-14	Bund2	151	crevice	g	d	1	1	4	0	0	0	0	50	50	0	0	0
2016-04-11	2016-04-12	2016-05-14	Bund2	151	exposed	g	e	1	0	1	0	0	0	70	20	5	5	0	0
2016-04-11	2016-04-12	2016-05-14	Bund2	151	crevice	g	f	1	0	0	0	0	0	0	45	50	0	5	0
2016-04-11	2016-04-12	2016-05-14	Bund2	151	exposed	g	g	1	0	0	0	0	0	80	0	0	10	10	0
2016-04-11	2016-04-12	2016-05-14	Bund2	151	crevice	g	h	1	0	1	0	0	0	0	70	25	0	5	0
2016-04-11	2016-04-12	2016-05-14	Bund2	151	crevice	g	h	2	0	1	0	0	0	0	70	25	0	5	0
2016-04-11	2016-04-12	2016-05-14	Bund2	151	crevice	g	h	3	0	1	0	0	0	0	70	25	0	5	0
2016-04-11	2016-04-12	2016-05-14	Bund2	151	crevice	g	i	1	0	0	0	0	0	80	10	0	10	0	0
2016-04-11	2016-04-12	2016-05-14	Bund2	151	crevice	h	a	1	0	1	0	0	0	50	50	0	0	0	0
2016-04-11	2016-04-12	2016-05-14	Bund2	151	exposed	h	b	1	0	0	0	0	0	60	0	0	40	0	0
2016-04-11	2016-04-12	2016-05-14	Bund2	151	crevice	h	c	1	1	7	0	0	0	5	60	30	5	0	0
2016-04-11	2016-04-12	2016-05-14	Bund2	151	crevice	h	c	2	1	3	0	0	0	5	60	30	5	0	0
2016-04-11	2016-04-12	2016-05-14	Bund2	151	crevice	h	c	3	1	3	0	0	0	5	60	30	5	0	0
2016-04-11	2016-04-12	2016-05-14	Bund2	151	crevice	h	c	4	1	3	0	0	0	5	60	30	5	0	0
2016-04-11	2016-04-12	2016-05-14	Bund2	151	exposed	h	d	1	0	0	0	0	0	80	0	0	20	0	0
2016-04-11	2016-04-12	2016-05-14	Bund2	151	crevice	h	e	1	1	2	3	1	0	0	50	50	0	0	0
2016-04-11	2016-04-12	2016-05-14	Bund2	151	exposed	h	f	1	0	0	0	0	0	70	0	0	10	20	0
2016-04-11	2016-04-12	2016-05-14	Bund2	151	crevice	h	g	1	0	0	0	0	0	10	40	40	5	5	0
2016-04-11	2016-04-12	2016-05-14	Bund2	151	exposed	h	h	1	0	0	0	0	0	65	0	0	5	30	0
2016-04-11	2016-04-12	2016-05-14	Bund2	151	crevice	h	i	1	0	0	0	0	0	100	0	0	0	0	0
2016-04-11	2016-04-12	2016-05-14	Bund2	151	crevice	i	a	1	0	0	0	0	0	100	0	0	0	0	0
2016-04-11	2016-04-12	2016-05-14	Bund2	151	crevice	i	b	1	1	40	0	0	0	100	0	0	0	0	0
2016-04-11	2016-04-12	2016-05-14	Bund2	151	crevice	i	c	1	1	2	0	0	0	95	5	0	0	0	0
2016-04-11	2016-04-12	2016-05-14	Bund2	151	crevice	i	d	1	1	16	6	1	0	40	10	0	50	0	0
2016-04-11	2016-04-12	2016-05-14	Bund2	151	crevice	i	e	1	0	0	0	0	0	90	0	0	10	0	0
2016-04-11	2016-04-12	2016-05-14	Bund2	151	crevice	i	f	1	1	5	0	0	0	90	0	0	10	0	0
2016-04-11	2016-04-12	2016-05-14	Bund2	151	crevice	i	g	1	0	0	0	0	0	95	0	0	5	0	0
2016-04-11	2016-04-12	2016-05-14	Bund2	151	crevice	i	h	1	0	0	0	0	0	90	10	0	0	0	0
2016-04-11	2016-04-12	2016-05-14	Bund2	151	crevice	i	i	1	0	0	0	0	0	90	10	0	0	0	0
2016-04-11	2016-04-12	2016-05-14	Bund2	152	crevice	a	a	1	1	3	0	0	0	0	100	0	0	0	0
2016-04-11	2016-04-12	2016-05-14	Bund2	152	crevice	a	b	1	1	34	0	0	0	0	100	0	0	0	0
2016-04-11	2016-04-12	2016-05-14	Bund2	152	crevice	a	c	1	1	47	0	0	0	5	95	0	0	0	0
2016-04-11	2016-04-12	2016-05-14	Bund2	152	crevice	a	d	1	0	0	0	0	0	30	50	0	20	0	0
2016-04-11	2016-04-12	2016-05-14	Bund2	152	crevice	a	e	1	0	0	0	0	0	50	20	0	30	0	0
2016-04-11	2016-04-12	2016-05-14	Bund2	152	crevice	a	f	1	1	36	0	0	0	90	0	0	10	0	0
2016-04-11	2016-04-12	2016-05-14	Bund2	152	crevice	a	g	1	1	7	0	0	5	70	15	5	5	0	0
2016-04-11	2016-04-12	2016-05-14	Bund2	152	crevice	a	g	2	1	16	0	0	5	70	15	5	5	0	0
2016-04-11	2016-04-12	2016-05-14	Bund2	152	crevice	a	h	1	1	62	0	0	0	10	80	0	10	0	0
2016-04-11	2016-04-12	2016-05-14	Bund2	152	crevice	a	i	1	0	0	0	0	0	0	100	0	0	0	0
2016-04-11	2016-04-12	2016-05-14	Bund2	152	crevice	b	a	1	1	55	0	0	0	0	100	0	0	0	0
2016-04-11	2016-04-12	2016-05-14	Bund2	152	exposed	b	b	1	1	32	0	0	0	35	55	5	5	0	0
2016-04-11	2016-04-12	2016-05-14	Bund2	152	crevice	b	c	1	1	23	0	0	0	0	90	5	5	0	0
2016-04-11	2016-04-12	2016-05-14	Bund2	152	exposed	b	d	1	1	76	0	0	0	15	55	20	10	0	0
2016-04-11	2016-04-12	2016-05-14	Bund2	152	crevice	b	e	1	1	156	0	0	0	15	35	50	0	0	0
2016-04-11	2016-04-12	2016-05-14	Bund2	152	crevice	b	e	2	1	4	0	0	0	15	35	50	0	0	0
2016-04-11	2016-04-12	2016-05-14	Bund2	152	exposed	b	f	1	0	1	0	0	0	65	25	0	10	0	0
2016-04-11	2016-04-12	2016-05-14	Bund2	152	exposed	b	f	2	0	1	0	0	0	65	25	0	10	0	0
2016-04-11	2016-04-12	2016-05-14	Bund2	152	exposed	b	f	3	1	15	0	0	0	65	25	0	10	0	0
2016-04-11	2016-04-12	2016-05-14	Bund2	152	crevice	b	g	1	1	5	0	0	0	0	80	20	0	0	0
2016-04-11	2016-04-12	2016-05-14	Bund2	152	crevice	b	g	2	1	2	0	0	0	0	80	20	0	0	0
2016-04-11	2016-04-12	2016-05-14	Bund2	152	exposed	b	h	1	0	1	0	0	0	65	20	10	5	0	0
2016-04-11	2016-04-12	2016-05-14	Bund2	152	exposed	b	h	2	0	1	0	0	0	65	20	10	5	0	0
2016-04-11	2016-04-12	2016-05-14	Bund2	152	exposed	b	h	3	1	6	0	0	0	65	20	10	5	0	0
2016-04-11	2016-04-12	2016-05-14	Bund2	152	crevice	b	i	1	1	27	0	0	0	20	40	40	0	0	0
2016-04-11	2016-04-12	2016-05-14	Bund2	152	crevice	c	a	1	1	35	0	0	0	0	100	0	0	0	0
2016-04-11	2016-04-12	2016-05-14	Bund2	152	crevice	c	b	1	1	19	0	0	0	0	100	0	0	0	0
2016-04-11	2016-04-12	2016-05-14	Bund2	152	crevice	c	b	2	1	4	0	0	0	0	100	0	0	0	0
2016-04-11	2016-04-12	2016-05-14	Bund2	152	exposed	c	c	1	1	51	0	0	5	25	40	20	10	0	0
2016-04-11	2016-04-12	2016-05-14	Bund2	152	crevice	c	d	1	0	1	0	0	0	0	10	90	0	0	0
2016-04-11	2016-04-12	2016-05-14	Bund2	152	exposed	c	e	1	1	2	0	0	0	5	60	30	5	0	0
2016-04-11	2016-04-12	2016-05-14	Bund2	152	exposed	c	e	2	0	1	0	0	0	5	60	30	5	0	0
2016-04-11	2016-04-12	2016-05-14	Bund2	152	exposed	c	e	3	1	3	0	0	0	5	60	30	5	0	0
2016-04-11	2016-04-12	2016-05-14	Bund2	152	exposed	c	e	4	0	1	0	0	0	5	60	30	5	0	0
2016-04-11	2016-04-12	2016-05-14	Bund2	152	crevice	c	f	1	0	0	0	0	0	0	60	40	0	0	0
2016-04-11	2016-04-12	2016-05-14	Bund2	152	exposed	c	g	1	0	0	0	0	0	90	5	0	5	0	0
2016-04-11	2016-04-12	2016-05-14	Bund2	152	crevice	c	h	1	1	2	0	0	0	0	50	50	0	0	0
2016-04-11	2016-04-12	2016-05-14	Bund2	152	crevice	c	h	2	0	1	0	0	0	0	50	50	0	0	0
2016-04-11	2016-04-12	2016-05-14	Bund2	152	crevice	c	h	3	1	12	0	0	0	0	50	50	0	0	0
2016-04-11	2016-04-12	2016-05-14	Bund2	152	crevice	c	h	4	1	5	0	0	0	0	50	50	0	0	0
2016-04-11	2016-04-12	2016-05-14	Bund2	152	crevice	c	h	5	1	2	0	0	0	0	50	50	0	0	0
2016-04-11	2016-04-12	2016-05-14	Bund2	152	crevice	c	i	1	0	0	0	0	0	20	40	40	0	0	0
2016-04-11	2016-04-12	2016-05-14	Bund2	152	crevice	d	a	1	0	0	0	0	0	0	100	0	0	0	0
2016-04-11	2016-04-12	2016-05-14	Bund2	152	exposed	d	b	1	0	1	0	0	10	20	40	5	25	0	0
2016-04-11	2016-04-12	2016-05-14	Bund2	152	exposed	d	b	2	0	1	0	0	10	20	40	5	25	0	0
2016-04-11	2016-04-12	2016-05-14	Bund2	152	exposed	d	b	3	0	1	0	0	10	20	40	5	25	0	0
2016-04-11	2016-04-12	2016-05-14	Bund2	152	exposed	d	b	4	1	8	0	0	10	20	40	5	25	0	0
2016-04-11	2016-04-12	2016-05-14	Bund2	152	exposed	d	b	5	1	10	0	0	10	20	40	5	25	0	0
2016-04-11	2016-04-12	2016-05-14	Bund2	152	exposed	d	b	6	0	1	0	0	10	20	40	5	25	0	0
2016-04-11	2016-04-12	2016-05-14	Bund2	152	crevice	d	c	1	0	1	0	0	0	0	90	5	5	0	0
2016-04-11	2016-04-12	2016-05-14	Bund2	152	crevice	d	c	2	1	4	0	0	0	0	90	5	5	0	0
2016-04-11	2016-04-12	2016-05-14	Bund2	152	crevice	d	c	3	0	1	0	0	0	0	90	5	5	0	0
2016-04-11	2016-04-12	2016-05-14	Bund2	152	crevice	d	c	4	0	1	0	0	0	0	90	5	5	0	0
2016-04-11	2016-04-12	2016-05-14	Bund2	152	crevice	d	c	5	0	1	0	0	0	0	90	5	5	0	0
2016-04-11	2016-04-12	2016-05-14	Bund2	152	crevice	d	c	6	0	1	0	0	0	0	90	5	5	0	0
2016-04-11	2016-04-12	2016-05-14	Bund2	152	crevice	d	c	7	0	1	0	0	0	0	90	5	5	0	0
2016-04-11	2016-04-12	2016-05-14	Bund2	152	crevice	d	c	8	0	1	0	0	0	0	90	5	5	0	0
2016-04-11	2016-04-12	2016-05-14	Bund2	152	exposed	d	d	1	1	3	0	0	0	15	50	30	5	0	0
2016-04-11	2016-04-12	2016-05-14	Bund2	152	exposed	d	d	2	1	4	0	0	0	15	50	30	5	0	0
2016-04-11	2016-04-12	2016-05-14	Bund2	152	exposed	d	d	3	1	3	0	0	0	15	50	30	5	0	0
2016-04-11	2016-04-12	2016-05-14	Bund2	152	crevice	d	e	1	0	0	0	0	0	0	60	40	0	0	0
2016-04-11	2016-04-12	2016-05-14	Bund2	152	exposed	d	f	1	0	0	0	0	0	90	0	0	10	0	0
2016-04-11	2016-04-12	2016-05-14	Bund2	152	crevice	d	g	1	0	0	0	0	0	0	95	5	0	0	0
2016-04-11	2016-04-12	2016-05-14	Bund2	152	exposed	d	h	1	0	1	0	0	0	95	0	0	5	0	0
2016-04-11	2016-04-12	2016-05-14	Bund2	152	exposed	d	h	2	0	1	0	0	0	95	0	0	5	0	0
2016-04-11	2016-04-12	2016-05-14	Bund2	152	exposed	d	h	3	0	1	0	0	0	95	0	0	5	0	0
2016-04-11	2016-04-12	2016-05-14	Bund2	152	exposed	d	h	4	1	2	0	0	0	95	0	0	5	0	0
2016-04-11	2016-04-12	2016-05-14	Bund2	152	crevice	d	i	1	1	2	0	0	0	20	40	40	0	0	0
2016-04-11	2016-04-12	2016-05-14	Bund2	152	crevice	e	a	1	1	16	0	0	0	40	60	0	0	0	0
2016-04-11	2016-04-12	2016-05-14	Bund2	152	crevice	e	b	1	1	62	0	0	0	0	95	5	0	0	0
2016-04-11	2016-04-12	2016-05-14	Bund2	152	exposed	e	c	1	0	1	0	0	0	10	80	10	0	0	0
2016-04-11	2016-04-12	2016-05-14	Bund2	152	exposed	e	c	2	0	1	0	0	0	10	80	10	0	0	0
2016-04-11	2016-04-12	2016-05-14	Bund2	152	exposed	e	c	3	0	1	0	0	0	10	80	10	0	0	0
2016-04-11	2016-04-12	2016-05-14	Bund2	152	exposed	e	c	4	0	1	0	0	0	10	80	10	0	0	0
2016-04-11	2016-04-12	2016-05-14	Bund2	152	exposed	e	c	5	0	1	0	0	0	10	80	10	0	0	0
2016-04-11	2016-04-12	2016-05-14	Bund2	152	exposed	e	c	6	1	2	0	0	0	10	80	10	0	0	0
2016-04-11	2016-04-12	2016-05-14	Bund2	152	crevice	e	d	1	0	0	0	0	5	0	70	15	10	0	0
2016-04-11	2016-04-12	2016-05-14	Bund2	152	crevice	e	f	1	0	0	0	0	0	0	60	40	0	0	0
2016-04-11	2016-04-12	2016-05-14	Bund2	152	exposed	e	g	1	1	3	0	0	0	75	15	0	10	0	0
2016-04-11	2016-04-12	2016-05-14	Bund2	152	exposed	e	g	2	0	1	0	0	0	75	15	0	10	0	0
2016-04-11	2016-04-12	2016-05-14	Bund2	152	exposed	e	g	3	0	1	1	1	0	75	15	0	10	0	0
2016-04-11	2016-04-12	2016-05-14	Bund2	152	crevice	e	h	1	1	5	0	0	0	0	50	50	0	0	0
2016-04-11	2016-04-12	2016-05-14	Bund2	152	crevice	e	h	2	0	1	0	0	0	0	50	50	0	0	0
2016-04-11	2016-04-12	2016-05-14	Bund2	152	crevice	e	h	3	0	1	0	0	0	0	50	50	0	0	0
2016-04-11	2016-04-12	2016-05-14	Bund2	152	crevice	e	i	1	0	1	0	0	0	20	40	40	0	0	0
2016-04-11	2016-04-12	2016-05-14	Bund2	152	crevice	f	a	1	0	0	0	0	0	50	50	0	0	0	0
2016-04-11	2016-04-12	2016-05-14	Bund2	152	exposed	f	b	1	0	1	0	0	5	20	55	5	15	0	0
2016-04-11	2016-04-12	2016-05-14	Bund2	152	crevice	f	c	1	0	0	0	0	0	0	60	20	0	0	20
2016-04-11	2016-04-12	2016-05-14	Bund2	152	exposed	f	d	1	0	1	0	0	0	10	80	10	0	0	0
2016-04-11	2016-04-12	2016-05-14	Bund2	152	exposed	f	d	2	0	1	0	0	0	10	80	10	0	0	0
2016-04-11	2016-04-12	2016-05-14	Bund2	152	exposed	f	d	3	0	1	0	0	0	10	80	10	0	0	0
2016-04-11	2016-04-12	2016-05-14	Bund2	152	exposed	f	d	4	0	1	0	0	0	10	80	10	0	0	0
2016-04-11	2016-04-12	2016-05-14	Bund2	152	exposed	f	d	5	0	1	0	0	0	10	80	10	0	0	0
2016-04-11	2016-04-12	2016-05-14	Bund2	152	exposed	f	d	6	0	1	0	0	0	10	80	10	0	0	0
2016-04-11	2016-04-12	2016-05-14	Bund2	152	crevice	f	e	1	0	0	0	0	0	0	60	40	0	0	0
2016-04-11	2016-04-12	2016-05-14	Bund2	152	exposed	f	f	1	1	3	0	0	0	75	10	0	15	0	0
2016-04-11	2016-04-12	2016-05-14	Bund2	152	exposed	f	f	2	0	1	0	0	0	75	10	0	15	0	0
2016-04-11	2016-04-12	2016-05-14	Bund2	152	exposed	f	f	3	0	1	0	0	0	75	10	0	15	0	0
2016-04-11	2016-04-12	2016-05-14	Bund2	152	crevice	f	g	1	0	0	0	0	0	0	80	20	0	0	0
2016-04-11	2016-04-12	2016-05-14	Bund2	152	exposed	f	h	1	1	2	0	0	0	80	10	5	5	0	0
2016-04-11	2016-04-12	2016-05-14	Bund2	152	exposed	f	h	2	0	1	0	0	0	80	10	5	5	0	0
2016-04-11	2016-04-12	2016-05-14	Bund2	152	exposed	f	h	3	1	2	0	0	0	80	10	5	5	0	0
2016-04-11	2016-04-12	2016-05-14	Bund2	152	exposed	f	h	4	0	1	0	0	0	80	10	5	5	0	0
2016-04-11	2016-04-12	2016-05-14	Bund2	152	exposed	f	h	5	1	6	0	0	0	80	10	5	5	0	0
2016-04-11	2016-04-12	2016-05-14	Bund2	152	crevice	f	i	1	1	12	0	0	0	30	40	30	0	0	0
2016-04-11	2016-04-12	2016-05-14	Bund2	152	crevice	g	a	1	0	0	0	0	0	50	50	0	0	0	0
2016-04-11	2016-04-12	2016-05-14	Bund2	152	crevice	g	b	1	1	61	1	1	0	5	80	5	10	0	0
2016-04-11	2016-04-12	2016-05-14	Bund2	152	exposed	g	c	1	1	2	0	0	0	50	10	5	35	0	0
2016-04-11	2016-04-12	2016-05-14	Bund2	152	exposed	g	c	2	1	8	3	1	0	50	10	5	35	0	0
2016-04-11	2016-04-12	2016-05-14	Bund2	152	exposed	g	c	3	0	1	0	0	0	50	10	5	35	0	0
2016-04-11	2016-04-12	2016-05-14	Bund2	152	exposed	g	c	4	0	1	0	0	0	50	10	5	35	0	0
2016-04-11	2016-04-12	2016-05-14	Bund2	152	exposed	g	c	5	1	7	0	0	0	50	10	5	35	0	0
2016-04-11	2016-04-12	2016-05-14	Bund2	152	exposed	g	c	6	0	1	0	0	0	50	10	5	35	0	0
2016-04-11	2016-04-12	2016-05-14	Bund2	152	exposed	g	c	7	1	4	0	0	0	50	10	5	35	0	0
2016-04-11	2016-04-12	2016-05-14	Bund2	152	crevice	g	d	1	0	1	0	0	0	0	50	50	0	0	0
2016-04-11	2016-04-12	2016-05-14	Bund2	152	exposed	g	e	1	1	6	0	0	0	75	5	0	20	0	0
2016-04-11	2016-04-12	2016-05-14	Bund2	152	crevice	g	f	1	1	4	0	0	0	0	60	40	0	0	0
2016-04-11	2016-04-12	2016-05-14	Bund2	152	crevice	g	f	2	0	1	0	0	0	0	60	40	0	0	0
2016-04-11	2016-04-12	2016-05-14	Bund2	152	exposed	g	g	1	1	17	0	0	0	85	15	0	0	0	0
2016-04-11	2016-04-12	2016-05-14	Bund2	152	crevice	g	h	1	1	7	1	1	5	15	55	25	0	0	0
2016-04-11	2016-04-12	2016-05-14	Bund2	152	crevice	g	h	2	0	1	1	1	5	15	55	25	0	0	0
2016-04-11	2016-04-12	2016-05-14	Bund2	152	crevice	g	h	3	0	1	1	1	5	15	55	25	0	0	0
2016-04-11	2016-04-12	2016-05-14	Bund2	152	crevice	g	h	4	1	7	0	0	5	15	55	25	0	0	0
2016-04-11	2016-04-12	2016-05-14	Bund2	152	crevice	g	i	1	1	4	0	0	0	90	10	0	0	0	0
2016-04-11	2016-04-12	2016-05-14	Bund2	152	crevice	h	a	1	0	0	0	0	0	0	100	0	0	0	0
2016-04-11	2016-04-12	2016-05-14	Bund2	152	exposed	h	b	1	1	4	0	0	15	30	30	0	25	0	0
2016-04-11	2016-04-12	2016-05-14	Bund2	152	exposed	h	b	2	1	11	0	0	15	30	30	0	25	0	0
2016-04-11	2016-04-12	2016-05-14	Bund2	152	exposed	h	b	3	1	4	0	0	15	30	30	0	25	0	0
2016-04-11	2016-04-12	2016-05-14	Bund2	152	crevice	h	c	1	1	10	0	0	0	0	40	60	0	0	0
2016-04-11	2016-04-12	2016-05-14	Bund2	152	crevice	h	c	2	1	17	0	0	0	0	40	60	0	0	0
2016-04-11	2016-04-12	2016-05-14	Bund2	152	exposed	h	d	1	1	3	0	0	0	80	0	0	20	0	0
2016-04-11	2016-04-12	2016-05-14	Bund2	152	exposed	h	d	2	1	3	0	0	0	80	0	0	20	0	0
2016-04-11	2016-04-12	2016-05-14	Bund2	152	crevice	h	e	1	0	1	0	0	0	5	60	35	0	0	0
2016-04-11	2016-04-12	2016-05-14	Bund2	152	crevice	h	e	2	0	1	1	1	0	5	60	35	0	0	0
2016-04-11	2016-04-12	2016-05-14	Bund2	152	crevice	h	e	3	1	5	0	0	0	5	60	35	0	0	0
2016-04-11	2016-04-12	2016-05-14	Bund2	152	crevice	h	e	4	1	15	0	0	0	5	60	35	0	0	0
2016-04-11	2016-04-12	2016-05-14	Bund2	152	exposed	h	f	1	1	4	0	0	0	85	5	0	10	0	0
2016-04-11	2016-04-12	2016-05-14	Bund2	152	exposed	h	f	2	1	2	0	0	0	85	5	0	10	0	0
2016-04-11	2016-04-12	2016-05-14	Bund2	152	crevice	h	g	1	1	50	0	0	0	40	40	5	15	0	0
2016-04-11	2016-04-12	2016-05-14	Bund2	152	exposed	h	h	1	1	42	0	0	0	80	5	0	15	0	0
2016-04-11	2016-04-12	2016-05-14	Bund2	152	crevice	h	i	1	1	28	2	1	0	80	10	0	10	0	0
2016-04-11	2016-04-12	2016-05-14	Bund2	152	crevice	i	a	1	0	0	0	0	0	0	100	0	0	0	0
2016-04-11	2016-04-12	2016-05-14	Bund2	152	crevice	i	b	1	1	10	0	0	5	20	60	10	5	0	0
2016-04-11	2016-04-12	2016-05-14	Bund2	152	crevice	i	c	1	1	5	0	0	5	20	60	10	5	0	0
2016-04-11	2016-04-12	2016-05-14	Bund2	152	crevice	i	d	1	1	2	2	1	0	90	0	0	10	0	0
2016-04-11	2016-04-12	2016-05-14	Bund2	152	crevice	i	e	1	0	0	0	0	0	5	60	35	0	0	0
2016-04-11	2016-04-12	2016-05-14	Bund2	152	crevice	i	f	1	0	0	0	0	0	80	10	0	10	0	0
2016-04-11	2016-04-12	2016-05-14	Bund2	152	crevice	i	g	1	0	0	0	0	0	80	10	0	10	0	0
2016-04-11	2016-04-12	2016-05-14	Bund2	152	crevice	i	h	1	0	0	0	0	0	70	10	0	20	0	0
2016-04-11	2016-04-12	2016-05-14	Bund2	152	crevice	i	i	1	0	0	0	0	0	0	100	0	0	0	0
2016-04-11	2016-04-12	2016-05-14	Bund2	153	crevice	a	a	1	0	0	0	0	0	100	0	0	0	0	0
2016-04-11	2016-04-12	2016-05-14	Bund2	153	crevice	a	b	1	0	0	0	0	0	50	20	0	30	0	0
2016-04-11	2016-04-12	2016-05-14	Bund2	153	crevice	a	c	1	0	0	0	0	0	50	40	0	10	0	0
2016-04-11	2016-04-12	2016-05-14	Bund2	153	crevice	a	d	1	0	1	0	0	0	0	100	0	0	0	0
2016-04-11	2016-04-12	2016-05-14	Bund2	153	crevice	a	d	2	0	1	0	0	0	0	100	0	0	0	0
2016-04-11	2016-04-12	2016-05-14	Bund2	153	crevice	a	e	1	0	0	0	0	10	50	30	0	10	0	0
2016-04-11	2016-04-12	2016-05-14	Bund2	153	crevice	a	f	1	1	10	0	0	0	50	0	0	50	0	0
2016-04-11	2016-04-12	2016-05-14	Bund2	153	crevice	a	g	1	0	0	0	0	0	35	35	0	30	0	0
2016-04-11	2016-04-12	2016-05-14	Bund2	153	crevice	a	h	1	0	0	0	0	0	50	50	0	0	0	0
2016-04-11	2016-04-12	2016-05-14	Bund2	153	crevice	a	i	1	0	0	0	0	0	0	100	0	0	0	0
2016-04-11	2016-04-12	2016-05-14	Bund2	153	crevice	b	a	1	0	1	0	0	0	50	50	0	0	0	0
2016-04-11	2016-04-12	2016-05-14	Bund2	153	exposed	b	b	1	1	12	0	0	0	85	2	0	13	0	0
2016-04-11	2016-04-12	2016-05-14	Bund2	153	crevice	b	c	1	1	57	0	0	10	15	45	0	30	0	0
2016-04-11	2016-04-12	2016-05-14	Bund2	153	exposed	b	d	1	0	1	0	0	0	60	20	0	20	0	0
2016-04-11	2016-04-12	2016-05-14	Bund2	153	exposed	b	d	2	0	1	0	0	0	60	20	0	20	0	0
2016-04-11	2016-04-12	2016-05-14	Bund2	153	exposed	b	d	3	0	1	0	0	0	60	20	0	20	0	0
2016-04-11	2016-04-12	2016-05-14	Bund2	153	crevice	b	e	1	0	1	0	0	5	5	75	10	5	0	0
2016-04-11	2016-04-12	2016-05-14	Bund2	153	crevice	b	e	2	1	2	0	0	5	5	75	10	5	0	0
2016-04-11	2016-04-12	2016-05-14	Bund2	153	crevice	b	e	3	1	30	0	0	5	5	75	10	5	0	0
2016-04-11	2016-04-12	2016-05-14	Bund2	153	exposed	b	f	1	1	5	0	0	5	25	10	0	60	0	0
2016-04-11	2016-04-12	2016-05-14	Bund2	153	crevice	b	g	1	0	1	0	0	0	0	80	10	10	0	0
2016-04-11	2016-04-12	2016-05-14	Bund2	153	crevice	b	g	2	0	1	0	0	0	0	80	10	10	0	0
2016-04-11	2016-04-12	2016-05-14	Bund2	153	crevice	b	g	3	0	1	0	0	0	0	80	10	10	0	0
2016-04-11	2016-04-12	2016-05-14	Bund2	153	crevice	b	g	4	0	1	0	0	0	0	80	10	10	0	0
2016-04-11	2016-04-12	2016-05-14	Bund2	153	crevice	b	g	5	0	1	0	0	0	0	80	10	10	0	0
2016-04-11	2016-04-12	2016-05-14	Bund2	153	crevice	b	g	6	0	1	0	0	0	0	80	10	10	0	0
2016-04-11	2016-04-12	2016-05-14	Bund2	153	crevice	b	g	7	1	3	1	1	0	0	80	10	10	0	0
2016-04-11	2016-04-12	2016-05-14	Bund2	153	crevice	b	g	8	1	5	0	0	0	0	80	10	10	0	0
2016-04-11	2016-04-12	2016-05-14	Bund2	153	exposed	b	h	1	1	10	0	0	0	20	70	0	10	0	0
2016-04-11	2016-04-12	2016-05-14	Bund2	153	crevice	b	i	1	0	0	0	0	0	0	100	0	0	0	0
2016-04-11	2016-04-12	2016-05-14	Bund2	153	crevice	c	a	1	0	0	0	0	0	10	80	0	10	0	0
2016-04-11	2016-04-12	2016-05-14	Bund2	153	crevice	c	b	1	1	74	0	0	0	5	80	5	10	0	0
2016-04-11	2016-04-12	2016-05-14	Bund2	153	exposed	c	c	1	1	6	0	0	0	60	5	0	35	0	0
2016-04-11	2016-04-12	2016-05-14	Bund2	153	exposed	c	c	2	1	14	0	0	0	60	5	0	35	0	0
2016-04-11	2016-04-12	2016-05-14	Bund2	153	exposed	c	c	3	0	1	0	0	0	60	5	0	35	0	0
2016-04-11	2016-04-12	2016-05-14	Bund2	153	crevice	c	d	1	0	1	0	0	20	0	60	20	0	0	0
2016-04-11	2016-04-12	2016-05-14	Bund2	153	exposed	c	e	1	1	7	0	0	0	75	5	0	20	0	0
2016-04-11	2016-04-12	2016-05-14	Bund2	153	exposed	c	e	2	0	1	0	0	0	75	5	0	20	0	0
2016-04-11	2016-04-12	2016-05-14	Bund2	153	crevice	c	f	1	0	0	0	0	0	0	45	40	15	0	0
2016-04-11	2016-04-12	2016-05-14	Bund2	153	exposed	c	g	1	0	0	0	0	5	75	5	0	15	0	0
2016-04-11	2016-04-12	2016-05-14	Bund2	153	crevice	c	h	1	0	0	0	0	0	5	85	5	5	0	0
2016-04-11	2016-04-12	2016-05-14	Bund2	153	crevice	c	i	1	0	0	0	0	0	50	50	0	0	0	0
2016-04-11	2016-04-12	2016-05-14	Bund2	153	crevice	d	a	1	0	1	0	0	0	50	50	0	0	0	0
2016-04-11	2016-04-12	2016-05-14	Bund2	153	crevice	d	a	2	0	1	0	0	0	50	50	0	0	0	0
2016-04-11	2016-04-12	2016-05-14	Bund2	153	exposed	d	b	1	1	3	3	1	0	85	5	0	10	0	0
2016-04-11	2016-04-12	2016-05-14	Bund2	153	exposed	d	b	2	1	10	0	0	0	85	5	0	10	0	0
2016-04-11	2016-04-12	2016-05-14	Bund2	153	crevice	d	c	1	0	1	0	0	0	0	100	0	0	0	0
2016-04-11	2016-04-12	2016-05-14	Bund2	153	crevice	d	c	2	0	1	0	0	0	0	100	0	0	0	0
2016-04-11	2016-04-12	2016-05-14	Bund2	153	crevice	d	c	3	0	1	0	0	0	0	100	0	0	0	0
2016-04-11	2016-04-12	2016-05-14	Bund2	153	crevice	d	c	4	0	1	0	0	0	0	100	0	0	0	0
2016-04-11	2016-04-12	2016-05-14	Bund2	153	exposed	d	d	1	0	1	0	0	0	60	15	5	20	0	0
2016-04-11	2016-04-12	2016-05-14	Bund2	153	crevice	d	e	1	0	0	0	0	20	0	70	5	5	0	0
2016-04-11	2016-04-12	2016-05-14	Bund2	153	exposed	d	f	1	1	3	0	0	0	70	20	0	10	0	0
2016-04-11	2016-04-12	2016-05-14	Bund2	153	crevice	d	g	1	0	0	0	0	0	0	90	5	5	0	0
2016-04-11	2016-04-12	2016-05-14	Bund2	153	exposed	d	h	1	0	1	0	0	0	30	30	10	30	0	0
2016-04-11	2016-04-12	2016-05-14	Bund2	153	crevice	d	i	1	0	0	0	0	0	0	100	0	0	0	0
2016-04-11	2016-04-12	2016-05-14	Bund2	153	crevice	e	a	1	0	0	0	0	0	20	80	0	0	0	0
2016-04-11	2016-04-12	2016-05-14	Bund2	153	crevice	e	b	1	0	1	0	0	0	5	80	10	5	0	0
2016-04-11	2016-04-12	2016-05-14	Bund2	153	crevice	e	b	2	1	8	0	0	0	5	80	10	5	0	0
2016-04-11	2016-04-12	2016-05-14	Bund2	153	crevice	e	b	3	0	1	0	0	0	5	80	10	5	0	0
2016-04-11	2016-04-12	2016-05-14	Bund2	153	crevice	e	b	4	0	1	0	0	0	5	80	10	5	0	0
2016-04-11	2016-04-12	2016-05-14	Bund2	153	crevice	e	b	5	0	1	0	0	0	5	80	10	5	0	0
2016-04-11	2016-04-12	2016-05-14	Bund2	153	crevice	e	b	6	1	9	0	0	0	5	80	10	5	0	0
2016-04-11	2016-04-12	2016-05-14	Bund2	153	crevice	e	b	7	0	1	0	0	0	5	80	10	5	0	0
2016-04-11	2016-04-12	2016-05-14	Bund2	153	exposed	e	c	1	1	2	0	0	0	85	5	0	10	0	0
2016-04-11	2016-04-12	2016-05-14	Bund2	153	exposed	e	c	2	1	2	0	0	0	85	5	0	10	0	0
2016-04-11	2016-04-12	2016-05-14	Bund2	153	exposed	e	c	3	0	1	0	0	0	85	5	0	10	0	0
2016-04-11	2016-04-12	2016-05-14	Bund2	153	exposed	e	c	4	1	7	0	0	0	85	5	0	10	0	0
2016-04-11	2016-04-12	2016-05-14	Bund2	153	exposed	e	c	5	0	1	0	0	0	85	5	0	10	0	0
2016-04-11	2016-04-12	2016-05-14	Bund2	153	exposed	e	c	6	1	2	0	0	0	85	5	0	10	0	0
2016-04-11	2016-04-12	2016-05-14	Bund2	153	exposed	e	c	7	1	2	0	0	0	85	5	0	10	0	0
2016-04-11	2016-04-12	2016-05-14	Bund2	153	crevice	e	d	1	1	3	0	0	0	0	85	5	10	0	0
2016-04-11	2016-04-12	2016-05-14	Bund2	153	crevice	e	d	2	1	2	2	1	0	0	85	5	10	0	0
2016-04-11	2016-04-12	2016-05-14	Bund2	153	crevice	e	f	1	0	1	0	0	0	0	50	50	0	0	0
2016-04-11	2016-04-12	2016-05-14	Bund2	153	crevice	e	f	2	0	1	0	0	0	0	50	50	0	0	0
2016-04-11	2016-04-12	2016-05-14	Bund2	153	crevice	e	f	3	0	1	0	0	0	0	50	50	0	0	0
2016-04-11	2016-04-12	2016-05-14	Bund2	153	exposed	e	g	1	0	1	1	1	0	85	5	0	10	0	0
2016-04-11	2016-04-12	2016-05-14	Bund2	153	exposed	e	g	2	0	1	0	0	0	85	5	0	10	0	0
2016-04-11	2016-04-12	2016-05-14	Bund2	153	exposed	e	g	3	0	1	0	0	0	85	5	0	10	0	0
2016-04-11	2016-04-12	2016-05-14	Bund2	153	crevice	e	h	1	0	0	0	0	0	0	100	0	0	0	0
2016-04-11	2016-04-12	2016-05-14	Bund2	153	crevice	e	i	1	0	0	0	0	0	10	90	0	0	0	0
2016-04-11	2016-04-12	2016-05-14	Bund2	153	crevice	f	a	1	0	0	0	0	0	40	60	0	0	0	0
2016-04-11	2016-04-12	2016-05-14	Bund2	153	exposed	f	b	1	1	3	0	0	0	80	10	0	10	0	0
2016-04-11	2016-04-12	2016-05-14	Bund2	153	exposed	f	b	2	0	1	0	0	0	80	10	0	10	0	0
2016-04-11	2016-04-12	2016-05-14	Bund2	153	exposed	f	b	3	0	1	0	0	0	80	10	0	10	0	0
2016-04-11	2016-04-12	2016-05-14	Bund2	153	exposed	f	b	4	0	1	0	0	0	80	10	0	10	0	0
2016-04-11	2016-04-12	2016-05-14	Bund2	153	exposed	f	b	5	1	2	0	0	0	80	10	0	10	0	0
2016-04-11	2016-04-12	2016-05-14	Bund2	153	crevice	f	c	1	0	1	0	0	0	0	85	10	5	0	0
2016-04-11	2016-04-12	2016-05-14	Bund2	153	crevice	f	c	2	0	1	1	1	0	0	85	10	5	0	0
2016-04-11	2016-04-12	2016-05-14	Bund2	153	crevice	f	c	3	1	2	0	0	0	0	85	10	5	0	0
2016-04-11	2016-04-12	2016-05-14	Bund2	153	crevice	f	c	4	0	1	0	0	0	0	85	10	5	0	0
2016-04-11	2016-04-12	2016-05-14	Bund2	153	crevice	f	c	5	1	2	0	0	0	0	85	10	5	0	0
2016-04-11	2016-04-12	2016-05-14	Bund2	153	crevice	f	c	6	0	1	0	0	0	0	85	10	5	0	0
2016-04-11	2016-04-12	2016-05-14	Bund2	153	exposed	f	d	1	1	2	0	0	0	90	5	0	5	0	0
2016-04-11	2016-04-12	2016-05-14	Bund2	153	exposed	f	d	2	1	6	0	0	0	90	5	0	5	0	0
2016-04-11	2016-04-12	2016-05-14	Bund2	153	exposed	f	d	3	0	1	0	0	0	90	5	0	5	0	0
2016-04-11	2016-04-12	2016-05-14	Bund2	153	crevice	f	e	1	0	0	0	0	0	5	95	0	0	0	0
2016-04-11	2016-04-12	2016-05-14	Bund2	153	exposed	f	f	1	1	6	0	0	5	65	25	0	5	0	0
2016-04-11	2016-04-12	2016-05-14	Bund2	153	exposed	f	f	2	0	1	0	0	5	65	25	0	5	0	0
2016-04-11	2016-04-12	2016-05-14	Bund2	153	crevice	f	g	1	0	0	0	0	0	0	90	10	0	0	0
2016-04-11	2016-04-12	2016-05-14	Bund2	153	exposed	f	h	1	0	1	0	0	0	20	50	10	20	0	0
2016-04-11	2016-04-12	2016-05-14	Bund2	153	crevice	f	i	1	0	0	0	0	0	0	100	0	0	0	0
2016-04-11	2016-04-12	2016-05-14	Bund2	153	crevice	g	a	1	0	0	0	0	0	10	90	0	0	0	0
2016-04-11	2016-04-12	2016-05-14	Bund2	153	crevice	g	b	1	1	46	0	0	0	0	50	50	0	0	0
2016-04-11	2016-04-12	2016-05-14	Bund2	153	exposed	g	c	1	0	1	0	0	0	60	15	0	25	0	0
2016-04-11	2016-04-12	2016-05-14	Bund2	153	exposed	g	c	2	1	3	0	0	0	60	15	0	25	0	0
2016-04-11	2016-04-12	2016-05-14	Bund2	153	exposed	g	c	3	0	1	0	0	0	60	15	0	25	0	0
2016-04-11	2016-04-12	2016-05-14	Bund2	153	exposed	g	c	4	0	1	0	0	0	60	15	0	25	0	0
2016-04-11	2016-04-12	2016-05-14	Bund2	153	exposed	g	c	5	1	6	0	0	0	60	15	0	25	0	0
2016-04-11	2016-04-12	2016-05-14	Bund2	153	exposed	g	c	6	1	6	6	1	0	60	15	0	25	0	0
2016-04-11	2016-04-12	2016-05-14	Bund2	153	crevice	g	d	1	0	1	0	0	0	0	80	20	0	0	0
2016-04-11	2016-04-12	2016-05-14	Bund2	153	crevice	g	d	2	0	1	0	0	0	0	80	20	0	0	0
2016-04-11	2016-04-12	2016-05-14	Bund2	153	crevice	g	d	3	0	1	0	0	0	0	80	20	0	0	0
2016-04-11	2016-04-12	2016-05-14	Bund2	153	crevice	g	d	4	0	1	0	0	0	0	80	20	0	0	0
2016-04-11	2016-04-12	2016-05-14	Bund2	153	exposed	g	e	1	1	13	0	0	10	35	35	0	20	0	0
2016-04-11	2016-04-12	2016-05-14	Bund2	153	exposed	g	e	2	1	2	0	0	10	35	35	0	20	0	0
2016-04-11	2016-04-12	2016-05-14	Bund2	153	crevice	g	f	1	0	0	0	0	0	0	50	50	0	0	0
2016-04-11	2016-04-12	2016-05-14	Bund2	153	exposed	g	g	1	0	1	0	0	0	50	40	5	5	0	0
2016-04-11	2016-04-12	2016-05-14	Bund2	153	exposed	g	g	2	1	3	1	1	0	50	40	5	5	0	0
2016-04-11	2016-04-12	2016-05-14	Bund2	153	crevice	g	h	1	1	6	2	1	0	0	100	0	0	0	0
2016-04-11	2016-04-12	2016-05-14	Bund2	153	crevice	g	i	1	0	0	0	0	0	0	100	0	0	0	0
2016-04-11	2016-04-12	2016-05-14	Bund2	153	crevice	h	a	1	1	3	0	0	0	0	100	0	0	0	0
2016-04-11	2016-04-12	2016-05-14	Bund2	153	crevice	h	a	2	0	1	0	0	0	0	100	0	0	0	0
2016-04-11	2016-04-12	2016-05-14	Bund2	153	exposed	h	b	1	0	0	0	0	0	80	10	0	10	0	0
2016-04-11	2016-04-12	2016-05-14	Bund2	153	crevice	h	c	1	1	31	0	0	0	0	80	20	0	0	0
2016-04-11	2016-04-12	2016-05-14	Bund2	153	exposed	h	d	1	0	1	0	0	0	40	30	10	20	0	0
2016-04-11	2016-04-12	2016-05-14	Bund2	153	exposed	h	d	2	0	1	0	0	0	40	30	10	20	0	0
2016-04-11	2016-04-12	2016-05-14	Bund2	153	exposed	h	d	3	0	1	0	0	0	40	30	10	20	0	0
2016-04-11	2016-04-12	2016-05-14	Bund2	153	crevice	h	e	1	1	2	0	0	0	0	95	5	0	0	0
2016-04-11	2016-04-12	2016-05-14	Bund2	153	crevice	h	e	2	1	2	0	0	0	0	95	5	0	0	0
2016-04-11	2016-04-12	2016-05-14	Bund2	153	crevice	h	e	3	0	1	0	0	0	0	95	5	0	0	0
2016-04-11	2016-04-12	2016-05-14	Bund2	153	crevice	h	e	4	1	7	0	0	0	0	95	5	0	0	0
2016-04-11	2016-04-12	2016-05-14	Bund2	153	exposed	h	f	1	0	1	0	0	5	35	30	0	30	0	0
2016-04-11	2016-04-12	2016-05-14	Bund2	153	exposed	h	f	2	0	1	0	0	5	35	30	0	30	0	0
2016-04-11	2016-04-12	2016-05-14	Bund2	153	exposed	h	f	3	0	1	0	0	5	35	30	0	30	0	0
2016-04-11	2016-04-12	2016-05-14	Bund2	153	exposed	h	f	4	0	1	0	0	5	35	30	0	30	0	0
2016-04-11	2016-04-12	2016-05-14	Bund2	153	crevice	h	g	1	0	1	0	0	0	0	90	5	5	0	0
2016-04-11	2016-04-12	2016-05-14	Bund2	153	crevice	h	g	2	0	1	0	0	0	0	90	5	5	0	0
2016-04-11	2016-04-12	2016-05-14	Bund2	153	crevice	h	g	3	0	1	1	1	0	0	90	5	5	0	0
2016-04-11	2016-04-12	2016-05-14	Bund2	153	crevice	h	g	4	0	1	1	1	0	0	90	5	5	0	0
2016-04-11	2016-04-12	2016-05-14	Bund2	153	crevice	h	g	5	1	7	2	1	0	0	90	5	5	0	0
2016-04-11	2016-04-12	2016-05-14	Bund2	153	crevice	h	g	6	1	11	0	0	0	0	90	5	5	0	0
2016-04-11	2016-04-12	2016-05-14	Bund2	153	exposed	h	h	1	1	7	0	0	5	50	20	0	25	0	0
2016-04-11	2016-04-12	2016-05-14	Bund2	153	exposed	h	h	2	0	1	0	0	5	50	20	0	25	0	0
2016-04-11	2016-04-12	2016-05-14	Bund2	153	crevice	h	i	1	0	0	0	0	0	0	100	0	0	0	0
2016-04-11	2016-04-12	2016-05-14	Bund2	153	crevice	i	a	1	1	9	0	0	0	0	100	0	0	0	0
2016-04-11	2016-04-12	2016-05-14	Bund2	153	crevice	i	b	1	1	3	0	0	0	10	10	0	80	0	0
2016-04-11	2016-04-12	2016-05-14	Bund2	153	crevice	i	c	1	0	0	0	0	0	5	15	0	80	0	0
2016-04-11	2016-04-12	2016-05-14	Bund2	153	crevice	i	d	1	0	1	0	0	0	0	100	0	0	0	0
2016-04-11	2016-04-12	2016-05-14	Bund2	153	crevice	i	e	1	0	0	0	0	5	20	75	0	0	0	0
2016-04-11	2016-04-12	2016-05-14	Bund2	153	crevice	i	f	1	0	0	0	0	0	0	100	0	0	0	0
2016-04-11	2016-04-12	2016-05-14	Bund2	153	crevice	i	g	1	0	0	0	0	0	0	100	0	0	0	0
2016-04-11	2016-04-12	2016-05-14	Bund2	153	crevice	i	h	1	0	0	0	0	0	0	100	0	0	0	0
2016-04-11	2016-04-12	2016-05-14	Bund2	153	crevice	i	i	1	0	0	0	0	0	0	100	0	0	0	0
2016-04-11	2016-04-12	2016-05-14	Bund2	154	crevice	a	a	1	0	0	0	0	0	50	50	0	0	0	0
2016-04-11	2016-04-12	2016-05-14	Bund2	154	crevice	a	b	1	0	0	0	0	0	50	25	0	25	0	0
2016-04-11	2016-04-12	2016-05-14	Bund2	154	crevice	a	c	1	0	0	0	0	0	50	25	0	25	0	0
2016-04-11	2016-04-12	2016-05-14	Bund2	154	crevice	a	d	1	0	0	0	0	0	50	25	0	25	0	0
2016-04-11	2016-04-12	2016-05-14	Bund2	154	crevice	a	e	1	0	0	0	0	0	10	60	30	0	0	0
2016-04-11	2016-04-12	2016-05-14	Bund2	154	crevice	a	f	1	0	0	0	0	0	50	25	0	25	0	0
2016-04-11	2016-04-12	2016-05-14	Bund2	154	crevice	a	g	1	0	0	0	0	0	50	30	20	0	0	0
2016-04-11	2016-04-12	2016-05-14	Bund2	154	crevice	a	h	1	0	0	0	0	0	100	0	0	0	0	0
2016-04-11	2016-04-12	2016-05-14	Bund2	154	crevice	a	i	1	0	0	0	0	0	100	0	0	0	0	0
2016-04-11	2016-04-12	2016-05-14	Bund2	154	crevice	b	a	1	0	0	0	0	0	60	0	0	40	0	0
2016-04-11	2016-04-12	2016-05-14	Bund2	154	exposed	b	b	1	0	1	0	0	10	70	0	0	20	0	0
2016-04-11	2016-04-12	2016-05-14	Bund2	154	exposed	b	b	2	0	1	0	0	10	70	0	0	20	0	0
2016-04-11	2016-04-12	2016-05-14	Bund2	154	exposed	b	b	3	0	1	0	0	10	70	0	0	20	0	0
2016-04-11	2016-04-12	2016-05-14	Bund2	154	crevice	b	c	1	0	0	0	0	0	0	50	50	0	0	0
2016-04-11	2016-04-12	2016-05-14	Bund2	154	exposed	b	d	1	0	1	0	0	5	80	0	0	15	0	0
2016-04-11	2016-04-12	2016-05-14	Bund2	154	crevice	b	e	1	0	0	0	0	0	0	50	50	0	0	0
2016-04-11	2016-04-12	2016-05-14	Bund2	154	exposed	b	f	1	0	0	0	0	5	80	10	2	3	0	0
2016-04-11	2016-04-12	2016-05-14	Bund2	154	crevice	b	g	1	0	0	0	0	0	0	50	50	0	0	0
2016-04-11	2016-04-12	2016-05-14	Bund2	154	exposed	b	h	1	0	0	0	0	10	75	3	2	10	0	0
2016-04-11	2016-04-12	2016-05-14	Bund2	154	crevice	b	i	1	1	14	0	0	0	0	100	0	0	0	0
2016-04-11	2016-04-12	2016-05-14	Bund2	154	crevice	c	a	1	0	0	0	0	0	20	40	40	0	0	0
2016-04-11	2016-04-12	2016-05-14	Bund2	154	crevice	c	b	1	0	0	0	0	0	0	50	50	0	0	0
2016-04-11	2016-04-12	2016-05-14	Bund2	154	exposed	c	c	1	0	1	0	0	0	40	30	20	10	0	0
2016-04-11	2016-04-12	2016-05-14	Bund2	154	exposed	c	c	2	0	1	0	0	0	40	30	20	10	0	0
2016-04-11	2016-04-12	2016-05-14	Bund2	154	exposed	c	c	3	0	1	0	0	0	40	30	20	10	0	0
2016-04-11	2016-04-12	2016-05-14	Bund2	154	exposed	c	c	4	1	5	0	0	0	40	30	20	10	0	0
2016-04-11	2016-04-12	2016-05-14	Bund2	154	crevice	c	d	1	0	0	0	0	0	0	50	50	0	0	0
2016-04-11	2016-04-12	2016-05-14	Bund2	154	exposed	c	e	1	0	1	0	0	0	45	30	20	5	0	0
2016-04-11	2016-04-12	2016-05-14	Bund2	154	exposed	c	e	2	0	1	0	0	0	45	30	20	5	0	0
2016-04-11	2016-04-12	2016-05-14	Bund2	154	exposed	c	e	3	0	1	0	0	0	45	30	20	5	0	0
2016-04-11	2016-04-12	2016-05-14	Bund2	154	crevice	c	f	1	0	0	0	0	0	0	50	50	0	0	0
2016-04-11	2016-04-12	2016-05-14	Bund2	154	exposed	c	g	1	1	7	0	0	0	50	25	10	15	0	0
2016-04-11	2016-04-12	2016-05-14	Bund2	154	exposed	c	g	2	0	1	0	0	0	50	25	10	15	0	0
2016-04-11	2016-04-12	2016-05-14	Bund2	154	exposed	c	g	3	0	1	0	0	0	50	25	10	15	0	0
2016-04-11	2016-04-12	2016-05-14	Bund2	154	crevice	c	h	1	1	8	0	0	0	0	50	50	0	0	0
2016-04-11	2016-04-12	2016-05-14	Bund2	154	crevice	c	i	1	0	0	0	0	0	20	40	40	0	0	0
2016-04-11	2016-04-12	2016-05-14	Bund2	154	crevice	d	a	1	0	0	0	0	0	0	100	0	0	0	0
2016-04-11	2016-04-12	2016-05-14	Bund2	154	exposed	d	b	1	0	1	0	0	5	25	10	2	58	0	0
2016-04-11	2016-04-12	2016-05-14	Bund2	154	crevice	d	c	1	0	0	0	0	0	0	70	30	0	0	0
2016-04-11	2016-04-12	2016-05-14	Bund2	154	exposed	d	d	1	0	1	0	0	0	5	90	5	0	0	0
2016-04-11	2016-04-12	2016-05-14	Bund2	154	crevice	d	e	1	0	0	0	0	0	0	95	5	0	0	0
2016-04-11	2016-04-12	2016-05-14	Bund2	154	exposed	d	f	1	0	1	0	0	0	10	75	10	5	0	0
2016-04-11	2016-04-12	2016-05-14	Bund2	154	exposed	d	f	2	0	1	0	0	0	0	95	5	0	0	0
2016-04-11	2016-04-12	2016-05-14	Bund2	154	crevice	d	g	1	0	0	0	0	0	0	100	0	0	0	0
2016-04-11	2016-04-12	2016-05-14	Bund2	154	exposed	d	h	1	0	0	0	0	0	20	75	5	0	0	0
2016-04-11	2016-04-12	2016-05-14	Bund2	154	crevice	d	i	1	1	8	0	0	0	50	50	0	0	0	0
2016-04-11	2016-04-12	2016-05-14	Bund2	154	crevice	e	a	1	0	0	0	0	0	50	50	0	0	0	0
2016-04-11	2016-04-12	2016-05-14	Bund2	154	crevice	e	b	1	1	7	0	0	0	0	90	0	10	0	0
2016-04-11	2016-04-12	2016-05-14	Bund2	154	crevice	e	b	2	0	1	0	0	0	0	90	0	10	0	0
2016-04-11	2016-04-12	2016-05-14	Bund2	154	exposed	e	c	1	1	2	0	0	0	35	40	5	20	0	0
2016-04-11	2016-04-12	2016-05-14	Bund2	154	exposed	e	c	2	1	3	0	0	0	35	40	5	20	0	0
2016-04-11	2016-04-12	2016-05-14	Bund2	154	crevice	e	d	1	0	1	0	0	0	0	95	5	0	0	0
2016-04-11	2016-04-12	2016-05-14	Bund2	154	crevice	e	d	2	0	1	0	0	0	0	95	5	0	0	0
2016-04-11	2016-04-12	2016-05-14	Bund2	154	crevice	e	f	1	0	1	0	0	0	0	95	5	0	0	0
2016-04-11	2016-04-12	2016-05-14	Bund2	154	crevice	e	f	2	0	1	0	0	0	0	95	5	0	0	0
2016-04-11	2016-04-12	2016-05-14	Bund2	154	crevice	e	f	3	0	1	0	0	0	0	95	5	0	0	0
2016-04-11	2016-04-12	2016-05-14	Bund2	154	crevice	e	f	4	0	1	0	0	0	0	95	5	0	0	0
2016-04-11	2016-04-12	2016-05-14	Bund2	154	crevice	e	f	5	0	1	0	0	0	0	95	5	0	0	0
2016-04-11	2016-04-12	2016-05-14	Bund2	154	exposed	e	g	1	1	8	0	0	0	15	68	15	2	0	0
2016-04-11	2016-04-12	2016-05-14	Bund2	154	exposed	e	g	2	1	3	0	0	0	15	68	15	2	0	0
2016-04-11	2016-04-12	2016-05-14	Bund2	154	exposed	e	g	3	0	1	0	0	0	15	68	15	2	0	0
2016-04-11	2016-04-12	2016-05-14	Bund2	154	exposed	e	g	4	0	1	0	0	0	15	68	15	2	0	0
2016-04-11	2016-04-12	2016-05-14	Bund2	154	exposed	e	g	5	0	1	0	0	0	15	68	15	2	0	0
2016-04-11	2016-04-12	2016-05-14	Bund2	154	crevice	e	h	1	0	1	0	0	0	5	95	0	0	0	0
2016-04-11	2016-04-12	2016-05-14	Bund2	154	crevice	e	h	2	1	14	0	0	0	10	90	0	0	0	0
2016-04-11	2016-04-12	2016-05-14	Bund2	154	crevice	e	h	3	1	10	5	1	0	10	90	0	0	0	0
2016-04-11	2016-04-12	2016-05-14	Bund2	154	crevice	e	i	1	0	0	0	0	0	80	20	0	0	0	0
2016-04-11	2016-04-12	2016-05-14	Bund2	154	crevice	f	a	1	0	0	0	0	0	5	95	0	0	0	0
2016-04-11	2016-04-12	2016-05-14	Bund2	154	exposed	f	b	1	0	1	0	0	5	60	5	0	30	0	0
2016-04-11	2016-04-12	2016-05-14	Bund2	154	exposed	f	b	2	1	3	0	0	5	60	5	0	30	0	0
2016-04-11	2016-04-12	2016-05-14	Bund2	154	crevice	f	c	1	1	5	2	1	0	0	90	10	0	0	0
2016-04-11	2016-04-12	2016-05-14	Bund2	154	crevice	f	c	2	1	5	2	1	0	0	90	10	0	0	0
2016-04-11	2016-04-12	2016-05-14	Bund2	154	crevice	f	c	3	1	4	1	1	0	0	90	10	0	0	0
2016-04-11	2016-04-12	2016-05-14	Bund2	154	exposed	f	d	1	1	18	0	0	15	55	20	5	5	0	0
2016-04-11	2016-04-12	2016-05-14	Bund2	154	crevice	f	e	1	1	9	0	0	0	0	50	50	0	0	0
2016-04-11	2016-04-12	2016-05-14	Bund2	154	crevice	f	e	2	0	1	1	1	0	0	50	50	0	0	0
2016-04-11	2016-04-12	2016-05-14	Bund2	154	exposed	f	f	1	0	1	0	0	0	10	85	5	0	0	0
2016-04-11	2016-04-12	2016-05-14	Bund2	154	exposed	f	f	2	1	3	0	0	0	10	85	5	0	0	0
2016-04-11	2016-04-12	2016-05-14	Bund2	154	exposed	f	f	3	1	11	0	0	0	10	85	5	0	0	0
2016-04-11	2016-04-12	2016-05-14	Bund2	154	exposed	f	f	4	0	1	0	0	0	10	85	5	0	0	0
2016-04-11	2016-04-12	2016-05-14	Bund2	154	exposed	f	f	5	0	1	1	1	0	10	85	5	0	0	0
2016-04-11	2016-04-12	2016-05-14	Bund2	154	exposed	f	f	6	0	1	1	1	0	10	85	5	0	0	0
2016-04-11	2016-04-12	2016-05-14	Bund2	154	crevice	f	g	1	1	20	4	1	0	0	50	50	0	0	0
2016-04-11	2016-04-12	2016-05-14	Bund2	154	exposed	f	h	1	1	3	0	0	0	15	75	10	0	0	0
2016-04-11	2016-04-12	2016-05-14	Bund2	154	exposed	f	h	2	1	3	0	0	0	15	75	10	0	0	0
2016-04-11	2016-04-12	2016-05-14	Bund2	154	exposed	f	h	3	1	4	0	0	0	15	75	10	0	0	0
2016-04-11	2016-04-12	2016-05-14	Bund2	154	exposed	f	h	4	1	2	0	0	0	15	75	10	0	0	0
2016-04-11	2016-04-12	2016-05-14	Bund2	154	exposed	f	h	5	1	2	0	0	0	15	75	10	0	0	0
2016-04-11	2016-04-12	2016-05-14	Bund2	154	crevice	f	i	1	0	0	0	0	0	0	100	0	0	0	0
2016-04-11	2016-04-12	2016-05-14	Bund2	154	crevice	g	a	1	0	0	0	0	0	5	90	0	5	0	0
2016-04-11	2016-04-12	2016-05-14	Bund2	154	crevice	g	b	1	0	0	0	0	0	0	75	25	0	0	0
2016-04-11	2016-04-12	2016-05-14	Bund2	154	exposed	g	c	1	0	0	0	0	5	65	10	5	15	0	0
2016-04-11	2016-04-12	2016-05-14	Bund2	154	crevice	g	d	1	0	0	0	0	0	0	50	50	0	0	0
2016-04-11	2016-04-12	2016-05-14	Bund2	154	exposed	g	e	1	0	0	0	0	0	40	40	10	10	0	0
2016-04-11	2016-04-12	2016-05-14	Bund2	154	crevice	g	f	1	0	0	0	0	0	0	50	50	0	0	0
2016-04-11	2016-04-12	2016-05-14	Bund2	154	exposed	g	g	1	0	0	0	0	0	15	75	5	5	0	0
2016-04-11	2016-04-12	2016-05-14	Bund2	154	crevice	g	h	1	1	157	0	0	0	0	100	0	0	0	0
2016-04-11	2016-04-12	2016-05-14	Bund2	154	crevice	g	i	1	0	0	0	0	0	0	100	0	0	0	0
2016-04-11	2016-04-12	2016-05-14	Bund2	154	crevice	h	a	1	0	0	0	0	0	5	95	0	0	0	0
2016-04-11	2016-04-12	2016-05-14	Bund2	154	exposed	h	b	1	0	0	0	0	0	90	5	0	5	0	0
2016-04-11	2016-04-12	2016-05-14	Bund2	154	crevice	h	c	1	1	38	0	0	0	0	70	30	0	0	0
2016-04-11	2016-04-12	2016-05-14	Bund2	154	exposed	h	d	1	1	11	0	0	5	65	15	10	5	0	0
2016-04-11	2016-04-12	2016-05-14	Bund2	154	crevice	h	e	1	1	40	0	0	0	0	80	15	5	0	0
2016-04-11	2016-04-12	2016-05-14	Bund2	154	exposed	h	f	1	1	27	0	0	0	70	20	5	5	0	0
2016-04-11	2016-04-12	2016-05-14	Bund2	154	crevice	h	g	1	1	98	0	0	0	0	90	5	5	0	0
2016-04-11	2016-04-12	2016-05-14	Bund2	154	exposed	h	h	1	0	1	0	0	0	5	90	5	0	0	0
2016-04-11	2016-04-12	2016-05-14	Bund2	154	exposed	h	h	2	1	3	0	0	0	5	90	5	0	0	0
2016-04-11	2016-04-12	2016-05-14	Bund2	154	crevice	h	i	1	1	10	0	0	0	0	100	0	0	0	0
2016-04-11	2016-04-12	2016-05-14	Bund2	154	crevice	h	i	2	1	26	0	0	0	0	100	0	0	0	0
2016-04-11	2016-04-12	2016-05-14	Bund2	154	crevice	i	a	1	0	0	0	0	0	0	100	0	0	0	0
2016-04-11	2016-04-12	2016-05-14	Bund2	154	crevice	i	b	1	0	0	0	0	0	10	90	0	0	0	0
2016-04-11	2016-04-12	2016-05-14	Bund2	154	crevice	i	c	1	0	0	0	0	0	10	90	0	0	0	0
2016-04-11	2016-04-12	2016-05-14	Bund2	154	crevice	i	d	1	0	0	0	0	0	0	100	0	0	0	0
2016-04-11	2016-04-12	2016-05-14	Bund2	154	crevice	i	e	1	0	0	0	0	0	5	90	0	5	0	0
2016-04-11	2016-04-12	2016-05-14	Bund2	154	crevice	i	f	1	0	0	0	0	0	0	100	0	0	0	0
2016-04-11	2016-04-12	2016-05-14	Bund2	154	crevice	i	g	1	0	0	0	0	0	0	100	0	0	0	0
2016-04-11	2016-04-12	2016-05-14	Bund2	154	crevice	i	h	1	1	10	0	0	0	0	100	0	0	0	0
2016-04-11	2016-04-12	2016-05-14	Bund2	154	crevice	i	i	1	0	0	0	0	0	0	100	0	0	0	0
2016-04-11	2016-04-12	2016-05-14	Bund2	155	crevice	a	a	1	0	0	0	0	0	100	0	0	0	0	0
2016-04-11	2016-04-12	2016-05-14	Bund2	155	crevice	a	b	1	0	0	0	0	0	70	10	0	20	0	0
2016-04-11	2016-04-12	2016-05-14	Bund2	155	crevice	a	c	1	0	0	0	0	0	80	0	0	20	0	0
2016-04-11	2016-04-12	2016-05-14	Bund2	155	crevice	a	d	1	0	0	0	0	0	70	10	0	20	0	0
2016-04-11	2016-04-12	2016-05-14	Bund2	155	crevice	a	e	1	0	0	0	0	0	70	10	0	20	0	0
2016-04-11	2016-04-12	2016-05-14	Bund2	155	crevice	a	f	1	0	0	0	0	0	70	10	0	20	0	0
2016-04-11	2016-04-12	2016-05-14	Bund2	155	crevice	a	g	1	0	1	0	0	0	60	20	10	10	0	0
2016-04-11	2016-04-12	2016-05-14	Bund2	155	crevice	a	g	2	1	4	0	0	0	60	20	10	10	0	0
2016-04-11	2016-04-12	2016-05-14	Bund2	155	crevice	a	h	1	0	0	0	0	0	60	20	10	10	0	0
2016-04-11	2016-04-12	2016-05-14	Bund2	155	crevice	a	i	1	0	0	0	0	0	0	100	0	0	0	0
2016-04-11	2016-04-12	2016-05-14	Bund2	155	crevice	b	a	1	1	14	0	0	0	60	30	0	10	0	0
2016-04-11	2016-04-12	2016-05-14	Bund2	155	crevice	b	a	2	1	9	0	0	0	60	30	0	10	0	0
2016-04-11	2016-04-12	2016-05-14	Bund2	155	exposed	b	b	1	0	0	0	0	10	60	5	5	20	0	0
2016-04-11	2016-04-12	2016-05-14	Bund2	155	crevice	b	c	1	0	0	0	0	15	5	65	10	5	0	0
2016-04-11	2016-04-12	2016-05-14	Bund2	155	exposed	b	d	1	0	0	0	0	5	65	10	10	10	0	0
2016-04-11	2016-04-12	2016-05-14	Bund2	155	crevice	b	e	1	0	0	0	0	20	0	55	15	5	0	5
2016-04-11	2016-04-12	2016-05-14	Bund2	155	exposed	b	f	1	0	1	0	0	5	75	12	3	5	0	0
2016-04-11	2016-04-12	2016-05-14	Bund2	155	crevice	b	g	1	1	8	0	0	0	15	40	40	5	0	0
2016-04-11	2016-04-12	2016-05-14	Bund2	155	crevice	b	g	2	0	1	0	0	0	15	40	40	5	0	0
2016-04-11	2016-04-12	2016-05-14	Bund2	155	crevice	b	g	3	1	2	0	0	0	15	40	40	5	0	0
2016-04-11	2016-04-12	2016-05-14	Bund2	155	crevice	b	g	4	1	2	0	0	0	15	40	40	5	0	0
2016-04-11	2016-04-12	2016-05-14	Bund2	155	crevice	b	g	5	1	6	0	0	0	15	40	40	5	0	0
2016-04-11	2016-04-12	2016-05-14	Bund2	155	exposed	b	h	1	1	24	0	0	0	70	20	5	5	0	0
2016-04-11	2016-04-12	2016-05-14	Bund2	155	exposed	b	h	2	1	3	0	0	0	70	20	5	5	0	0
2016-04-11	2016-04-12	2016-05-14	Bund2	155	exposed	b	h	3	1	7	0	0	0	70	20	5	5	0	0
2016-04-11	2016-04-12	2016-05-14	Bund2	155	crevice	b	i	1	1	7	0	0	0	0	100	0	0	0	0
2016-04-11	2016-04-12	2016-05-14	Bund2	155	crevice	c	a	1	0	0	0	0	0	50	20	30	0	0	0
2016-04-11	2016-04-12	2016-05-14	Bund2	155	crevice	c	b	1	1	7	1	1	5	10	40	40	5	0	0
2016-04-11	2016-04-12	2016-05-14	Bund2	155	crevice	c	b	2	1	7	4	1	5	10	40	40	5	0	0
2016-04-11	2016-04-12	2016-05-14	Bund2	155	crevice	c	b	3	1	2	1	1	5	10	40	40	5	0	0
2016-04-11	2016-04-12	2016-05-14	Bund2	155	crevice	c	b	4	0	1	0	0	5	10	40	40	5	0	0
2016-04-11	2016-04-12	2016-05-14	Bund2	155	exposed	c	c	1	0	0	0	0	5	50	10	0	35	0	0
2016-04-11	2016-04-12	2016-05-14	Bund2	155	crevice	c	d	1	0	0	0	0	5	0	50	40	5	0	0
2016-04-11	2016-04-12	2016-05-14	Bund2	155	exposed	c	e	1	0	0	0	0	5	35	45	10	5	0	0
2016-04-11	2016-04-12	2016-05-14	Bund2	155	crevice	c	f	1	0	0	0	0	0	0	60	40	0	0	0
2016-04-11	2016-04-12	2016-05-14	Bund2	155	exposed	c	g	1	0	0	0	0	0	80	10	5	5	0	0
2016-04-11	2016-04-12	2016-05-14	Bund2	155	crevice	c	h	1	1	99	0	0	0	0	80	20	0	0	0
2016-04-11	2016-04-12	2016-05-14	Bund2	155	crevice	c	i	1	0	0	0	0	0	0	80	20	0	0	0
2016-04-11	2016-04-12	2016-05-14	Bund2	155	crevice	d	a	1	1	30	0	0	5	80	5	5	5	0	0
2016-04-11	2016-04-12	2016-05-14	Bund2	155	exposed	d	b	1	0	0	0	0	5	90	0	0	5	0	0
2016-04-11	2016-04-12	2016-05-14	Bund2	155	crevice	d	c	1	0	0	0	0	5	0	80	15	0	0	0
2016-04-11	2016-04-12	2016-05-14	Bund2	155	exposed	d	d	1	0	0	0	0	0	30	55	5	10	0	0
2016-04-11	2016-04-12	2016-05-14	Bund2	155	crevice	d	e	1	0	0	0	0	5	0	60	20	15	0	0
2016-04-11	2016-04-12	2016-05-14	Bund2	155	exposed	d	f	1	0	0	0	0	0	35	60	5	0	0	0
2016-04-11	2016-04-12	2016-05-14	Bund2	155	crevice	d	g	1	0	0	0	0	10	0	75	5	10	0	0
2016-04-11	2016-04-12	2016-05-14	Bund2	155	exposed	d	h	1	0	1	0	0	0	75	20	5	0	0	0
2016-04-11	2016-04-12	2016-05-14	Bund2	155	exposed	d	h	2	1	5	2	1	0	75	20	5	0	0	0
2016-04-11	2016-04-12	2016-05-14	Bund2	155	crevice	d	i	1	0	0	0	0	0	0	80	20	0	0	0
2016-04-11	2016-04-12	2016-05-14	Bund2	155	crevice	e	a	1	0	1	0	0	5	80	5	10	0	0	0
2016-04-11	2016-04-12	2016-05-14	Bund2	155	crevice	e	a	2	0	1	0	0	5	80	5	10	0	0	0
2016-04-11	2016-04-12	2016-05-14	Bund2	155	crevice	e	a	3	1	8	8	1	5	80	5	10	0	0	0
2016-04-11	2016-04-12	2016-05-14	Bund2	155	crevice	e	b	1	1	4	0	0	5	10	60	15	10	0	0
2016-04-11	2016-04-12	2016-05-14	Bund2	155	crevice	e	b	2	0	1	0	0	5	10	60	15	10	0	0
2016-04-11	2016-04-12	2016-05-14	Bund2	155	crevice	e	b	3	1	2	0	0	5	10	60	15	10	0	0
2016-04-11	2016-04-12	2016-05-14	Bund2	155	exposed	e	c	1	0	1	0	0	5	73	10	2	10	0	0
2016-04-11	2016-04-12	2016-05-14	Bund2	155	exposed	e	c	2	1	2	0	0	5	73	10	2	10	0	0
2016-04-11	2016-04-12	2016-05-14	Bund2	155	crevice	e	d	1	0	0	0	0	5	0	55	0	40	0	0
2016-04-11	2016-04-12	2016-05-14	Bund2	155	crevice	e	f	1	0	0	0	0	0	0	80	20	0	0	0
2016-04-11	2016-04-12	2016-05-14	Bund2	155	exposed	e	g	1	0	1	0	0	0	60	20	5	15	0	0
2016-04-11	2016-04-12	2016-05-14	Bund2	155	exposed	e	g	2	0	1	0	0	0	60	20	5	15	0	0
2016-04-11	2016-04-12	2016-05-14	Bund2	155	crevice	e	h	1	1	7	0	0	0	0	75	25	0	0	0
2016-04-11	2016-04-12	2016-05-14	Bund2	155	crevice	e	h	2	1	12	0	0	0	0	75	25	0	0	0
2016-04-11	2016-04-12	2016-05-14	Bund2	155	crevice	e	h	3	1	4	0	0	0	0	75	25	0	0	0
2016-04-11	2016-04-12	2016-05-14	Bund2	155	crevice	e	i	1	1	15	0	0	0	0	75	25	0	0	0
2016-04-11	2016-04-12	2016-05-14	Bund2	155	crevice	f	a	1	1	26	0	0	0	50	25	25	0	0	0
2016-04-11	2016-04-12	2016-05-14	Bund2	155	exposed	f	b	1	0	0	0	0	5	60	25	5	5	0	0
2016-04-11	2016-04-12	2016-05-14	Bund2	155	crevice	f	c	1	0	0	0	0	0	0	60	25	15	0	0
2016-04-11	2016-04-12	2016-05-14	Bund2	155	exposed	f	d	1	1	3	3	1	0	60	15	5	20	0	0
2016-04-11	2016-04-12	2016-05-14	Bund2	155	crevice	f	e	1	0	0	0	0	0	0	80	10	10	0	0
2016-04-11	2016-04-12	2016-05-14	Bund2	155	exposed	f	f	1	1	6	0	0	0	80	5	5	10	0	0
2016-04-11	2016-04-12	2016-05-14	Bund2	155	exposed	f	f	2	1	3	0	0	0	80	5	5	10	0	0
2016-04-11	2016-04-12	2016-05-14	Bund2	155	exposed	f	f	3	0	1	1	1	0	80	5	5	10	0	0
2016-04-11	2016-04-12	2016-05-14	Bund2	155	crevice	f	g	1	0	1	0	0	5	0	40	50	5	0	0
2016-04-11	2016-04-12	2016-05-14	Bund2	155	crevice	f	g	2	0	1	0	0	5	0	40	50	5	0	0
2016-04-11	2016-04-12	2016-05-14	Bund2	155	crevice	f	g	3	0	1	0	0	5	0	40	50	5	0	0
2016-04-11	2016-04-12	2016-05-14	Bund2	155	crevice	f	g	4	0	1	0	0	5	0	40	50	5	0	0
2016-04-11	2016-04-12	2016-05-14	Bund2	155	crevice	f	g	5	0	1	0	0	5	0	40	50	5	0	0
2016-04-11	2016-04-12	2016-05-14	Bund2	155	crevice	f	g	6	1	3	0	0	5	0	40	50	5	0	0
2016-04-11	2016-04-12	2016-05-14	Bund2	155	crevice	f	g	7	0	1	0	0	5	0	40	50	5	0	0
2016-04-11	2016-04-12	2016-05-14	Bund2	155	crevice	f	g	8	0	1	0	0	5	0	40	50	5	0	0
2016-04-11	2016-04-12	2016-05-14	Bund2	155	crevice	f	g	9	1	4	0	0	5	0	40	50	5	0	0
2016-04-11	2016-04-12	2016-05-14	Bund2	155	exposed	f	h	1	1	65	0	0	5	75	10	3	7	0	0
2016-04-11	2016-04-12	2016-05-14	Bund2	155	crevice	f	i	1	0	0	0	0	0	50	50	0	0	0	0
2016-04-11	2016-04-12	2016-05-14	Bund2	155	crevice	g	a	1	0	0	0	0	0	5	40	55	0	0	0
2016-04-11	2016-04-12	2016-05-14	Bund2	155	crevice	g	b	1	1	49	0	0	5	0	20	60	15	0	0
2016-04-11	2016-04-12	2016-05-14	Bund2	155	crevice	g	b	2	0	1	0	0	5	0	20	60	15	0	0
2016-04-11	2016-04-12	2016-05-14	Bund2	155	crevice	g	b	3	0	1	0	0	5	0	20	60	15	0	0
2016-04-11	2016-04-12	2016-05-14	Bund2	155	exposed	g	c	1	1	39	0	0	0	60	20	10	10	0	0
2016-04-11	2016-04-12	2016-05-14	Bund2	155	exposed	g	c	2	1	8	0	0	0	60	20	10	10	0	0
2016-04-11	2016-04-12	2016-05-14	Bund2	155	crevice	g	d	1	1	2	0	0	0	0	60	35	5	0	0
2016-04-11	2016-04-12	2016-05-14	Bund2	155	crevice	g	d	2	0	1	0	0	0	0	60	35	5	0	0
2016-04-11	2016-04-12	2016-05-14	Bund2	155	crevice	g	d	3	0	1	0	0	0	0	60	35	5	0	0
2016-04-11	2016-04-12	2016-05-14	Bund2	155	crevice	g	d	4	1	10	0	0	0	0	60	35	5	0	0
2016-04-11	2016-04-12	2016-05-14	Bund2	155	exposed	g	e	1	1	35	2	1	0	65	15	5	15	0	0
2016-04-11	2016-04-12	2016-05-14	Bund2	155	crevice	g	f	1	1	6	0	0	0	0	60	40	0	0	0
2016-04-11	2016-04-12	2016-05-14	Bund2	155	crevice	g	f	2	1	10	0	0	0	0	60	40	0	0	0
2016-04-11	2016-04-12	2016-05-14	Bund2	155	exposed	g	g	1	0	1	0	0	0	75	5	15	5	0	0
2016-04-11	2016-04-12	2016-05-14	Bund2	155	exposed	g	g	2	0	1	0	0	0	75	5	15	5	0	0
2016-04-11	2016-04-12	2016-05-14	Bund2	155	crevice	g	h	1	0	1	0	0	0	0	50	50	0	0	0
2016-04-11	2016-04-12	2016-05-14	Bund2	155	crevice	g	h	2	0	1	0	0	0	0	50	50	0	0	0
2016-04-11	2016-04-12	2016-05-14	Bund2	155	crevice	g	h	3	0	1	0	0	0	0	50	50	0	0	0
2016-04-11	2016-04-12	2016-05-14	Bund2	155	crevice	g	h	4	1	6	0	0	0	0	50	50	0	0	0
2016-04-11	2016-04-12	2016-05-14	Bund2	155	crevice	g	h	5	1	25	0	0	0	0	50	50	0	0	0
2016-04-11	2016-04-12	2016-05-14	Bund2	155	crevice	g	i	1	0	0	0	0	0	40	40	20	0	0	0
2016-04-11	2016-04-12	2016-05-14	Bund2	155	crevice	h	a	1	1	67	0	0	0	40	40	20	0	0	0
2016-04-11	2016-04-12	2016-05-14	Bund2	155	exposed	h	b	1	1	3	2	1	0	60	30	5	5	0	0
2016-04-11	2016-04-12	2016-05-14	Bund2	155	exposed	h	b	2	1	24	0	0	0	60	30	5	5	0	0
2016-04-11	2016-04-12	2016-05-14	Bund2	155	crevice	h	c	1	1	107	0	0	5	5	80	5	5	0	0
2016-04-11	2016-04-12	2016-05-14	Bund2	155	exposed	h	d	1	1	17	0	0	0	90	5	0	5	0	0
2016-04-11	2016-04-12	2016-05-14	Bund2	155	crevice	h	e	1	1	16	0	0	5	5	80	5	5	0	0
2016-04-11	2016-04-12	2016-05-14	Bund2	155	crevice	h	e	2	1	6	0	0	5	5	80	5	5	0	0
2016-04-11	2016-04-12	2016-05-14	Bund2	155	crevice	h	e	3	0	1	0	0	5	5	80	5	5	0	0
2016-04-11	2016-04-12	2016-05-14	Bund2	155	crevice	h	e	4	1	40	0	0	5	5	80	5	5	0	0
2016-04-11	2016-04-12	2016-05-14	Bund2	155	exposed	h	f	1	1	3	0	0	0	45	5	40	10	0	0
2016-04-11	2016-04-12	2016-05-14	Bund2	155	exposed	h	f	2	1	16	0	0	0	45	5	40	10	0	0
2016-04-11	2016-04-12	2016-05-14	Bund2	155	exposed	h	f	3	1	2	2	1	0	45	5	40	10	0	0
2016-04-11	2016-04-12	2016-05-14	Bund2	155	crevice	h	g	1	1	36	0	0	5	0	60	30	5	0	0
2016-04-11	2016-04-12	2016-05-14	Bund2	155	crevice	h	g	2	1	33	0	0	5	0	60	30	5	0	0
2016-04-11	2016-04-12	2016-05-14	Bund2	155	exposed	h	h	1	0	1	0	0	0	70	15	5	10	0	0
2016-04-11	2016-04-12	2016-05-14	Bund2	155	exposed	h	h	2	1	9	0	0	0	70	15	5	10	0	0
2016-04-11	2016-04-12	2016-05-14	Bund2	155	exposed	h	h	3	0	1	0	0	0	70	15	5	10	0	0
2016-04-11	2016-04-12	2016-05-14	Bund2	155	crevice	h	i	1	1	6	0	0	0	40	40	20	0	0	0
2016-04-11	2016-04-12	2016-05-14	Bund2	155	crevice	i	a	1	0	0	0	0	0	100	0	0	0	0	0
2016-04-11	2016-04-12	2016-05-14	Bund2	155	crevice	i	b	1	0	0	0	0	0	50	40	0	10	0	0
2016-04-11	2016-04-12	2016-05-14	Bund2	155	crevice	i	c	1	0	0	0	0	0	70	30	0	0	0	0
2016-04-11	2016-04-12	2016-05-14	Bund2	155	crevice	i	d	1	1	14	0	0	0	80	10	0	10	0	0
2016-04-11	2016-04-12	2016-05-14	Bund2	155	crevice	i	e	1	0	0	0	0	0	50	50	0	0	0	0
2016-04-11	2016-04-12	2016-05-14	Bund2	155	crevice	i	f	1	1	6	0	0	0	50	50	0	0	0	0
2016-04-11	2016-04-12	2016-05-14	Bund2	155	crevice	i	g	1	1	3	0	0	0	30	50	20	0	0	0
2016-04-11	2016-04-12	2016-05-14	Bund2	155	crevice	i	h	1	0	0	0	0	0	30	50	20	0	0	0
2016-04-11	2016-04-12	2016-05-14	Bund2	155	crevice	i	i	1	0	0	0	0	0	30	50	20	0	0	0
2016-04-11	2016-04-12	2016-05-14	NW1	161	crevice	a	a	1	0	0	0	0	0	48	38	1	14	0	0
2016-04-11	2016-04-12	2016-05-14	NW1	161	crevice	a	b	1	0	0	0	0	13	33	48	1	6	0	0
2016-04-11	2016-04-12	2016-05-14	NW1	161	crevice	a	c	1	0	0	0	0	1	65	29	1	4	0	0
2016-04-11	2016-04-12	2016-05-14	NW1	161	crevice	a	d	1	0	0	0	0	2	60	32	1	5	0	0
2016-04-11	2016-04-12	2016-05-14	NW1	161	crevice	a	e	1	0	1	0	0	0	48	38	11	4	0	0
2016-04-11	2016-04-12	2016-05-14	NW1	161	crevice	a	f	1	0	0	0	0	0	60	38	1	1	0	0
2016-04-11	2016-04-12	2016-05-14	NW1	161	crevice	a	g	1	0	1	0	0	0	63	33	1	4	0	0
2016-04-11	2016-04-12	2016-05-14	NW1	161	crevice	a	h	1	0	1	0	0	0	68	23	1	9	0	0
2016-04-11	2016-04-12	2016-05-14	NW1	161	crevice	a	h	2	0	1	0	0	0	68	23	1	9	0	0
2016-04-11	2016-04-12	2016-05-14	NW1	161	crevice	a	h	3	0	1	0	0	0	68	23	1	9	0	0
2016-04-11	2016-04-12	2016-05-14	NW1	161	crevice	a	h	4	0	1	0	0	0	68	23	1	9	0	0
2016-04-11	2016-04-12	2016-05-14	NW1	161	crevice	a	h	5	0	1	0	0	0	68	23	1	9	0	0
2016-04-11	2016-04-12	2016-05-14	NW1	161	crevice	a	h	6	1	10	0	0	0	68	23	1	9	0	0
2016-04-11	2016-04-12	2016-05-14	NW1	161	crevice	a	i	1	0	0	0	0	0	10	88	1	1	0	0
2016-04-11	2016-04-12	2016-05-14	NW1	161	crevice	b	a	1	0	0	0	0	0	34	56	1	9	0	0
2016-04-11	2016-04-12	2016-05-14	NW1	161	exposed	b	b	1	0	0	0	0	4	44	44	4	4	0	0
2016-04-11	2016-04-12	2016-05-14	NW1	161	crevice	b	c	1	0	0	0	0	6	39	41	11	2	1	0
2016-04-11	2016-04-12	2016-05-14	NW1	161	exposed	b	d	1	0	0	0	0	1	33	46	15	5	0	0
2016-04-11	2016-04-12	2016-05-14	NW1	161	crevice	b	e	1	0	1	0	0	3	8	73	14	2	0	0
2016-04-11	2016-04-12	2016-05-14	NW1	161	exposed	b	f	1	0	0	0	0	1	41	49	3	7	0	0
2016-04-11	2016-04-12	2016-05-14	NW1	161	crevice	b	g	1	0	1	0	0	3	27	55	8	7	0	0
2016-04-11	2016-04-12	2016-05-14	NW1	161	crevice	b	g	2	0	1	0	0	3	27	55	8	7	0	0
2016-04-11	2016-04-12	2016-05-14	NW1	161	crevice	b	g	3	1	2	2	1	3	27	55	8	7	0	0
2016-04-11	2016-04-12	2016-05-14	NW1	161	crevice	b	g	4	1	2	0	0	3	27	55	8	7	0	0
2016-04-11	2016-04-12	2016-05-14	NW1	161	crevice	b	g	5	0	1	0	0	3	27	55	8	7	0	0
2016-04-11	2016-04-12	2016-05-14	NW1	161	exposed	b	h	1	1	9	0	0	4	41	46	6	3	0	0
2016-04-11	2016-04-12	2016-05-14	NW1	161	crevice	b	i	1	0	0	0	0	0	45	53	0	3	0	0
2016-04-11	2016-04-12	2016-05-14	NW1	161	crevice	c	a	1	0	0	0	0	8	41	40	7	5	0	0
2016-04-11	2016-04-12	2016-05-14	NW1	161	crevice	c	b	1	0	0	0	0	10	9	63	15	3	1	0
2016-04-11	2016-04-12	2016-05-14	NW1	161	exposed	c	c	1	0	0	0	0	1	44	38	6	11	0	0
2016-04-11	2016-04-12	2016-05-14	NW1	161	crevice	c	d	1	0	0	0	0	45	3	19	30	4	0	0
2016-04-11	2016-04-12	2016-05-14	NW1	161	exposed	c	e	1	0	0	0	0	1	41	35	15	8	0	0
2016-04-11	2016-04-12	2016-05-14	NW1	161	crevice	c	f	1	0	0	0	0	30	1	20	48	1	0	0
2016-04-11	2016-04-12	2016-05-14	NW1	161	exposed	c	g	1	1	3	2	1	5	51	33	1	10	0	0
2016-04-11	2016-04-12	2016-05-14	NW1	161	exposed	c	g	2	0	1	0	0	5	51	33	1	10	0	0
2016-04-11	2016-04-12	2016-05-14	NW1	161	crevice	c	h	1	1	5	0	0	11	13	56	14	6	0	0
2016-04-11	2016-04-12	2016-05-14	NW1	161	crevice	c	h	2	1	4	0	0	11	13	56	14	6	0	0
2016-04-11	2016-04-12	2016-05-14	NW1	161	crevice	c	h	3	0	1	0	0	11	13	56	14	6	0	0
2016-04-11	2016-04-12	2016-05-14	NW1	161	crevice	c	h	4	0	1	0	0	11	13	56	14	6	0	0
2016-04-11	2016-04-12	2016-05-14	NW1	161	crevice	c	h	5	0	1	0	0	11	13	56	14	6	0	0
2016-04-11	2016-04-12	2016-05-14	NW1	161	crevice	c	h	6	0	1	0	0	11	13	56	14	6	0	0
2016-04-11	2016-04-12	2016-05-14	NW1	161	crevice	c	i	1	0	0	0	0	0	43	35	13	10	0	0
2016-04-11	2016-04-12	2016-05-14	NW1	161	crevice	d	a	1	1	2	0	0	15	35	46	0	4	0	0
2016-04-11	2016-04-12	2016-05-14	NW1	161	crevice	d	a	2	1	5	4	1	15	35	46	0	4	0	0
2016-04-11	2016-04-12	2016-05-14	NW1	161	exposed	d	b	1	0	0	0	0	11	35	43	1	9	0	0
2016-04-11	2016-04-12	2016-05-14	NW1	161	crevice	d	c	1	0	0	0	0	45	14	15	26	0	0	0
2016-04-11	2016-04-12	2016-05-14	NW1	161	exposed	d	d	1	0	0	0	0	4	45	33	11	8	0	0
2016-04-11	2016-04-12	2016-05-14	NW1	161	crevice	d	e	1	0	0	0	0	23	7	21	46	4	0	0
2016-04-11	2016-04-12	2016-05-14	NW1	161	exposed	d	f	1	0	0	0	0	4	35	44	14	4	0	0
2016-04-11	2016-04-12	2016-05-14	NW1	161	crevice	d	g	1	0	0	0	0	44	4	36	14	3	0	0
2016-04-11	2016-04-12	2016-05-14	NW1	161	exposed	d	h	1	0	0	0	0	3	36	44	15	3	0	0
2016-04-11	2016-04-12	2016-05-14	NW1	161	crevice	d	i	1	0	0	0	0	0	38	54	8	1	0	0
2016-04-11	2016-04-12	2016-05-14	NW1	161	crevice	e	a	1	0	0	0	0	0	18	55	23	5	0	0
2016-04-11	2016-04-12	2016-05-14	NW1	161	crevice	e	b	1	0	1	0	0	1	7	52	39	1	0	0
2016-04-11	2016-04-12	2016-05-14	NW1	161	crevice	e	b	2	0	1	0	0	1	7	52	39	1	0	0
2016-04-11	2016-04-12	2016-05-14	NW1	161	exposed	e	c	1	0	0	0	0	4	41	36	13	6	0	0
2016-04-11	2016-04-12	2016-05-14	NW1	161	crevice	e	d	1	0	0	0	0	28	8	33	29	4	0	0
2016-04-11	2016-04-12	2016-05-14	NW1	161	crevice	e	f	1	0	1	0	0	21	6	39	29	5	0	0
2016-04-11	2016-04-12	2016-05-14	NW1	161	exposed	e	g	1	0	0	0	0	4	12	63	18	4	0	0
2016-04-11	2016-04-12	2016-05-14	NW1	161	crevice	e	h	1	1	2	0	0	8	30	51	9	3	0	0
2016-04-11	2016-04-12	2016-05-14	NW1	161	crevice	e	i	1	0	0	0	0	3	31	53	12	1	0	0
2016-04-11	2016-04-12	2016-05-14	NW1	161	crevice	f	a	1	1	14	0	0	0	0	85	15	0	0	0
2016-04-11	2016-04-12	2016-05-14	NW1	161	exposed	f	b	1	0	0	0	0	3	58	28	8	3	0	0
2016-04-11	2016-04-12	2016-05-14	NW1	161	crevice	f	c	1	0	0	0	0	43	14	16	19	9	0	0
2016-04-11	2016-04-12	2016-05-14	NW1	161	exposed	f	d	1	0	0	0	0	3	41	34	15	4	4	0
2016-04-11	2016-04-12	2016-05-14	NW1	161	crevice	f	e	1	0	0	0	0	35	6	29	26	5	0	0
2016-04-11	2016-04-12	2016-05-14	NW1	161	exposed	f	f	1	0	0	0	0	10	18	53	15	5	0	0
2016-04-11	2016-04-12	2016-05-14	NW1	161	crevice	f	g	1	0	0	0	0	38	6	29	24	4	0	0
2016-04-11	2016-04-12	2016-05-14	NW1	161	exposed	f	h	1	0	0	0	0	9	21	66	1	3	0	0
2016-04-11	2016-04-12	2016-05-14	NW1	161	crevice	f	i	1	0	1	0	0	3	31	55	10	1	0	0
2016-04-11	2016-04-12	2016-05-14	NW1	161	crevice	f	i	2	1	30	0	0	3	31	55	10	1	0	0
2016-04-11	2016-04-12	2016-05-14	NW1	161	crevice	g	a	1	0	0	0	0	1	46	24	23	6	0	0
2016-04-11	2016-04-12	2016-05-14	NW1	161	crevice	g	b	1	1	21	6	1	6	30	46	13	6	0	0
2016-04-11	2016-04-12	2016-05-14	NW1	161	crevice	g	b	2	0	1	0	0	6	30	46	13	6	0	0
2016-04-11	2016-04-12	2016-05-14	NW1	161	crevice	g	b	3	1	2	0	0	6	30	46	13	6	0	0
2016-04-11	2016-04-12	2016-05-14	NW1	161	crevice	g	b	4	0	1	0	0	6	30	46	13	6	0	0
2016-04-11	2016-04-12	2016-05-14	NW1	161	crevice	g	b	5	1	3	0	0	6	30	46	13	6	0	0
2016-04-11	2016-04-12	2016-05-14	NW1	161	exposed	g	c	1	1	9	2	1	4	39	44	13	1	0	0
2016-04-11	2016-04-12	2016-05-14	NW1	161	exposed	g	c	2	1	4	0	0	4	39	44	13	1	0	0
2016-04-11	2016-04-12	2016-05-14	NW1	161	crevice	g	d	1	0	0	0	0	55	4	30	5	6	0	0
2016-04-11	2016-04-12	2016-05-14	NW1	161	exposed	g	e	1	0	0	0	0	16	32	39	6	7	0	0
2016-04-11	2016-04-12	2016-05-14	NW1	161	crevice	g	f	1	0	1	0	0	45	6	27	19	3	0	0
2016-04-11	2016-04-12	2016-05-14	NW1	161	exposed	g	g	1	1	2	0	0	8	28	48	11	6	0	0
2016-04-11	2016-04-12	2016-05-14	NW1	161	exposed	g	g	2	1	7	0	0	8	28	48	11	6	0	0
2016-04-11	2016-04-12	2016-05-14	NW1	161	exposed	g	g	3	0	1	0	0	8	28	48	11	6	0	0
2016-04-11	2016-04-12	2016-05-14	NW1	161	exposed	g	g	4	0	1	0	0	8	28	48	11	6	0	0
2016-04-11	2016-04-12	2016-05-14	NW1	161	crevice	g	h	1	1	10	0	0	2	5	78	9	6	0	0
2016-04-11	2016-04-12	2016-05-14	NW1	161	crevice	g	h	2	1	4	0	0	2	5	78	9	6	0	0
2016-04-11	2016-04-12	2016-05-14	NW1	161	crevice	g	h	3	0	1	0	0	2	5	78	9	6	0	0
2016-04-11	2016-04-12	2016-05-14	NW1	161	crevice	g	h	4	0	1	0	0	2	5	78	9	6	0	0
2016-04-11	2016-04-12	2016-05-14	NW1	161	crevice	g	h	5	1	25	0	0	2	5	78	9	6	0	0
2016-04-11	2016-04-12	2016-05-14	NW1	161	crevice	g	i	1	0	0	0	0	0	4	73	21	3	0	0
2016-04-11	2016-04-12	2016-05-14	NW1	161	crevice	h	a	1	0	0	0	0	8	32	52	8	0	0	0
2016-04-11	2016-04-12	2016-05-14	NW1	161	exposed	h	b	1	0	1	0	0	16	31	39	8	6	0	0
2016-04-11	2016-04-12	2016-05-14	NW1	161	crevice	h	c	1	1	95	0	0	9	15	61	7	7	0	0
2016-04-11	2016-04-12	2016-05-14	NW1	161	exposed	h	d	1	0	1	0	0	4	29	53	11	4	0	0
2016-04-11	2016-04-12	2016-05-14	NW1	161	exposed	h	d	2	1	3	0	0	4	29	53	11	4	0	0
2016-04-11	2016-04-12	2016-05-14	NW1	161	crevice	h	e	1	1	123	0	0	1	1	81	13	4	0	0
2016-04-11	2016-04-12	2016-05-14	NW1	161	exposed	h	f	1	1	3	0	0	9	28	44	10	10	0	0
2016-04-11	2016-04-12	2016-05-14	NW1	161	exposed	h	f	2	1	5	4	1	9	28	44	10	10	0	0
2016-04-11	2016-04-12	2016-05-14	NW1	161	crevice	h	g	1	1	71	0	0	9	12	55	17	7	0	0
2016-04-11	2016-04-12	2016-05-14	NW1	161	exposed	h	h	1	1	8	0	0	7	54	23	6	10	0	0
2016-04-11	2016-04-12	2016-05-14	NW1	161	exposed	h	h	2	1	4	0	0	7	54	23	6	10	0	0
2016-04-11	2016-04-12	2016-05-14	NW1	161	crevice	h	i	1	1	45	0	0	0	34	58	8	0	0	0
2016-04-11	2016-04-12	2016-05-14	NW1	161	crevice	i	a	1	0	0	0	0	13	39	43	5	1	0	0
2016-04-11	2016-04-12	2016-05-14	NW1	161	crevice	i	b	1	1	35	0	0	4	23	68	4	1	0	0
2016-04-11	2016-04-12	2016-05-14	NW1	161	crevice	i	c	1	0	0	0	0	3	31	53	5	9	0	0
2016-04-11	2016-04-12	2016-05-14	NW1	161	crevice	i	d	1	1	15	0	0	3	9	75	5	9	0	0
2016-04-11	2016-04-12	2016-05-14	NW1	161	crevice	i	d	1	0	1	0	0	3	9	75	5	9	0	0
2016-04-11	2016-04-12	2016-05-14	NW1	161	crevice	i	e	1	0	1	0	0	3	9	75	5	9	0	0
2016-04-11	2016-04-12	2016-05-14	NW1	161	crevice	i	f	1	1	29	0	0	3	21	63	5	9	0	0
2016-04-11	2016-04-12	2016-05-14	NW1	161	crevice	i	g	1	0	0	0	0	0	41	45	5	9	0	0
2016-04-11	2016-04-12	2016-05-14	NW1	161	crevice	i	h	1	1	30	0	0	0	15	79	5	1	0	0
2016-04-11	2016-04-12	2016-05-14	NW1	161	crevice	i	i	1	0	0	0	0	0	14	80	5	1	0	0
2016-04-11	2016-04-12	2016-05-14	NW1	162	crevice	a	a	1	0	0	0	0	0	50	0	0	50	0	0
2016-04-11	2016-04-12	2016-05-14	NW1	162	crevice	a	b	1	0	0	0	0	10	50	20	0	20	0	0
2016-04-11	2016-04-12	2016-05-14	NW1	162	crevice	a	c	1	0	0	0	0	0	80	15	0	5	0	0
2016-04-11	2016-04-12	2016-05-14	NW1	162	crevice	a	d	1	0	0	0	0	0	70	20	0	10	0	0
2016-04-11	2016-04-12	2016-05-14	NW1	162	crevice	a	e	1	0	0	0	0	0	40	10	40	10	0	0
2016-04-11	2016-04-12	2016-05-14	NW1	162	crevice	a	f	1	0	0	0	0	0	90	10	0	0	0	0
2016-04-11	2016-04-12	2016-05-14	NW1	162	crevice	a	g	1	0	0	0	0	0	80	10	0	10	0	0
2016-04-11	2016-04-12	2016-05-14	NW1	162	crevice	a	h	1	0	1	0	0	0	50	20	0	30	0	0
2016-04-11	2016-04-12	2016-05-14	NW1	162	crevice	a	i	1	1	15	0	0	0	0	100	0	0	0	0
2016-04-11	2016-04-12	2016-05-14	NW1	162	crevice	b	a	1	0	0	0	0	0	50	30	0	20	0	0
2016-04-11	2016-04-12	2016-05-14	NW1	162	exposed	b	b	1	0	0	0	0	10	70	10	0	10	0	0
2016-04-11	2016-04-12	2016-05-14	NW1	162	crevice	b	c	1	0	1	0	0	20	70	5	0	5	0	0
2016-04-11	2016-04-12	2016-05-14	NW1	162	exposed	b	d	1	0	0	0	0	0	20	20	50	10	0	0
2016-04-11	2016-04-12	2016-05-14	NW1	162	crevice	b	e	1	0	1	0	0	15	25	40	20	0	0	0
2016-04-11	2016-04-12	2016-05-14	NW1	162	exposed	b	f	1	0	0	0	0	5	75	10	0	10	0	0
2016-04-11	2016-04-12	2016-05-14	NW1	162	crevice	b	g	1	1	44	0	0	5	40	40	5	10	0	0
2016-04-11	2016-04-12	2016-05-14	NW1	162	crevice	b	g	2	0	1	0	0	5	40	40	5	10	0	0
2016-04-11	2016-04-12	2016-05-14	NW1	162	exposed	b	h	1	1	16	0	0	5	85	5	0	5	0	0
2016-04-11	2016-04-12	2016-05-14	NW1	162	crevice	b	i	1	1	20	0	0	0	50	50	0	0	0	0
2016-04-11	2016-04-12	2016-05-14	NW1	162	crevice	c	a	1	0	0	0	0	10	80	10	0	0	0	0
2016-04-11	2016-04-12	2016-05-14	NW1	162	crevice	c	b	1	0	0	0	0	20	30	20	30	0	0	0
2016-04-11	2016-04-12	2016-05-14	NW1	162	exposed	c	c	1	0	0	0	0	5	80	0	0	15	0	0
2016-04-11	2016-04-12	2016-05-14	NW1	162	crevice	c	d	1	0	0	0	0	80	2	4	10	4	0	0
2016-04-11	2016-04-12	2016-05-14	NW1	162	exposed	c	e	1	0	0	0	0	5	65	20	0	10	0	0
2016-04-11	2016-04-12	2016-05-14	NW1	162	crevice	c	f	1	0	0	0	0	60	0	20	20	0	0	0
2016-04-11	2016-04-12	2016-05-14	NW1	162	exposed	c	g	1	0	1	0	0	5	70	10	0	15	0	0
2016-04-11	2016-04-12	2016-05-14	NW1	162	exposed	c	g	2	0	1	0	0	5	70	10	0	15	0	0
2016-04-11	2016-04-12	2016-05-14	NW1	162	exposed	c	g	3	1	4	0	0	5	70	10	0	15	0	0
2016-04-11	2016-04-12	2016-05-14	NW1	162	crevice	c	h	1	1	89	0	0	0	0	50	50	0	0	0
2016-04-11	2016-04-12	2016-05-14	NW1	162	crevice	c	i	1	0	0	0	0	0	0	50	50	0	0	0
2016-04-11	2016-04-12	2016-05-14	NW1	162	crevice	d	a	1	1	2	0	0	40	30	30	0	0	0	0
2016-04-11	2016-04-12	2016-05-14	NW1	162	exposed	d	b	1	0	0	0	0	10	50	25	0	15	0	0
2016-04-11	2016-04-12	2016-05-14	NW1	162	crevice	d	c	1	0	0	0	0	90	2	3	5	0	0	0
2016-04-11	2016-04-12	2016-05-14	NW1	162	exposed	d	d	1	0	0	0	0	0	75	15	0	10	0	0
2016-04-11	2016-04-12	2016-05-14	NW1	162	crevice	d	e	1	0	0	0	0	20	2	0	73	5	0	0
2016-04-11	2016-04-12	2016-05-14	NW1	162	exposed	d	f	1	0	0	0	0	10	50	30	5	5	0	0
2016-04-11	2016-04-12	2016-05-14	NW1	162	crevice	d	g	1	0	0	0	0	90	0	0	10	0	0	0
2016-04-11	2016-04-12	2016-05-14	NW1	162	exposed	d	h	1	1	12	0	0	0	10	80	10	0	0	0
2016-04-11	2016-04-12	2016-05-14	NW1	162	crevice	d	i	1	1	14	0	0	0	0	100	0	0	0	0
2016-04-11	2016-04-12	2016-05-14	NW1	162	crevice	e	a	1	0	1	0	0	0	50	10	40	0	0	0
2016-04-11	2016-04-12	2016-05-14	NW1	162	crevice	e	b	1	0	1	0	0	0	5	45	50	0	0	0
2016-04-11	2016-04-12	2016-05-14	NW1	162	crevice	e	b	2	0	1	0	0	0	5	45	50	0	0	0
2016-04-11	2016-04-12	2016-05-14	NW1	162	crevice	e	b	3	1	11	0	0	0	5	45	50	0	0	0
2016-04-11	2016-04-12	2016-05-14	NW1	162	crevice	e	b	4	0	1	0	0	0	5	45	50	0	0	0
2016-04-11	2016-04-12	2016-05-14	NW1	162	exposed	e	c	1	0	0	0	0	5	70	15	0	10	0	0
2016-04-11	2016-04-12	2016-05-14	NW1	162	crevice	e	d	1	0	0	0	0	60	0	5	30	5	0	0
2016-04-11	2016-04-12	2016-05-14	NW1	162	crevice	e	f	1	0	0	0	0	40	0	20	30	10	0	0
2016-04-11	2016-04-12	2016-05-14	NW1	162	exposed	e	g	1	0	0	0	0	5	30	50	10	5	0	0
2016-04-11	2016-04-12	2016-05-14	NW1	162	crevice	e	h	1	1	12	0	0	5	20	70	5	0	0	0
2016-04-11	2016-04-12	2016-05-14	NW1	162	crevice	e	h	2	1	6	0	0	5	20	70	5	0	0	0
2016-04-11	2016-04-12	2016-05-14	NW1	162	crevice	e	h	3	1	20	0	0	5	20	70	5	0	0	0
2016-04-11	2016-04-12	2016-05-14	NW1	162	crevice	e	h	4	1	30	0	0	5	20	70	5	0	0	0
2016-04-11	2016-04-12	2016-05-14	NW1	162	crevice	e	i	1	1	6	0	0	0	50	50	0	0	0	0
2016-04-11	2016-04-12	2016-05-14	NW1	162	crevice	e	i	2	0	1	0	0	0	50	50	0	0	0	0
2016-04-11	2016-04-12	2016-05-14	NW1	162	crevice	f	a	1	1	18	0	0	0	0	100	0	0	0	0
2016-04-11	2016-04-12	2016-05-14	NW1	162	exposed	f	b	1	0	1	0	0	5	80	10	0	5	0	0
2016-04-11	2016-04-12	2016-05-14	NW1	162	exposed	f	b	2	0	1	0	0	0	85	10	0	5	0	0
2016-04-11	2016-04-12	2016-05-14	NW1	162	crevice	f	c	1	0	0	0	0	85	2	5	6	2	0	0
2016-04-11	2016-04-12	2016-05-14	NW1	162	exposed	f	d	1	0	0	0	0	5	45	20	10	5	15	0
2016-04-11	2016-04-12	2016-05-14	NW1	162	crevice	f	e	1	0	0	0	0	80	2	10	3	5	0	0
2016-04-11	2016-04-12	2016-05-14	NW1	162	exposed	f	f	1	0	0	0	0	10	25	60	0	5	0	0
2016-04-11	2016-04-12	2016-05-14	NW1	162	crevice	f	g	1	0	0	0	0	90	0	5	5	0	0	0
2016-04-11	2016-04-12	2016-05-14	NW1	162	exposed	f	h	1	1	2	0	0	0	3	95	0	2	0	0
2016-04-11	2016-04-12	2016-05-14	NW1	162	exposed	f	h	2	1	4	0	0	0	3	95	0	2	0	0
2016-04-11	2016-04-12	2016-05-14	NW1	162	crevice	f	i	1	1	2	0	0	0	50	50	0	0	0	0
2016-04-11	2016-04-12	2016-05-14	NW1	162	crevice	f	i	2	1	15	0	0	0	50	50	0	0	0	0
2016-04-11	2016-04-12	2016-05-14	NW1	162	crevice	g	a	1	0	0	0	0	0	90	5	0	5	0	0
2016-04-11	2016-04-12	2016-05-14	NW1	162	crevice	g	b	1	1	28	0	0	10	50	30	0	10	0	0
2016-04-11	2016-04-12	2016-05-14	NW1	162	crevice	g	b	2	1	4	0	0	10	50	30	0	10	0	0
2016-04-11	2016-04-12	2016-05-14	NW1	162	crevice	g	b	3	1	2	0	0	10	50	30	0	10	0	0
2016-04-11	2016-04-12	2016-05-14	NW1	162	crevice	g	b	4	1	7	0	0	10	50	30	0	10	0	0
2016-04-11	2016-04-12	2016-05-14	NW1	162	exposed	g	c	1	0	0	0	0	5	60	35	0	0	0	0
2016-04-11	2016-04-12	2016-05-14	NW1	162	crevice	g	d	1	0	0	0	0	50	0	40	10	0	0	0
2016-04-11	2016-04-12	2016-05-14	NW1	162	exposed	g	e	1	0	0	0	0	15	45	30	0	10	0	0
2016-04-11	2016-04-12	2016-05-14	NW1	162	crevice	g	f	1	0	0	0	0	50	0	40	10	0	0	0
2016-04-11	2016-04-12	2016-05-14	NW1	162	exposed	g	g	1	0	0	0	0	5	40	25	25	5	0	0
2016-04-11	2016-04-12	2016-05-14	NW1	162	crevice	g	h	1	1	54	0	0	0	0	100	0	0	0	0
2016-04-11	2016-04-12	2016-05-14	NW1	162	crevice	g	i	1	0	0	0	0	0	0	100	0	0	0	0
2016-04-11	2016-04-12	2016-05-14	NW1	162	crevice	h	a	1	1	14	0	0	0	80	20	0	0	0	0
2016-04-11	2016-04-12	2016-05-14	NW1	162	exposed	h	b	1	1	59	0	0	5	40	50	0	5	0	0
2016-04-11	2016-04-12	2016-05-14	NW1	162	crevice	h	c	1	0	0	0	0	20	20	40	0	20	0	0
2016-04-11	2016-04-12	2016-05-14	NW1	162	exposed	h	d	1	0	0	0	0	0	5	90	5	0	0	0
2016-04-11	2016-04-12	2016-05-14	NW1	162	crevice	h	e	1	0	0	0	0	0	0	100	0	0	0	0
2016-04-11	2016-04-12	2016-05-14	NW1	162	exposed	h	f	1	0	0	0	0	10	30	50	0	10	0	0
2016-04-11	2016-04-12	2016-05-14	NW1	162	crevice	h	g	1	1	2	0	0	10	5	75	0	10	0	0
2016-04-11	2016-04-12	2016-05-14	NW1	162	exposed	h	h	1	0	1	0	0	25	25	25	0	25	0	0
2016-04-11	2016-04-12	2016-05-14	NW1	162	crevice	h	i	1	1	8	0	0	0	50	50	0	0	0	0
2016-04-11	2016-04-12	2016-05-14	NW1	162	crevice	h	i	2	1	2	0	0	0	50	50	0	0	0	0
2016-04-11	2016-04-12	2016-05-14	NW1	162	crevice	i	a	1	0	0	0	0	0	100	0	0	0	0	0
2016-04-11	2016-04-12	2016-05-14	NW1	162	crevice	i	b	1	1	3	0	0	0	50	50	0	0	0	0
2016-04-11	2016-04-12	2016-05-14	NW1	162	crevice	i	b	2	1	10	0	0	0	50	50	0	0	0	0
2016-04-11	2016-04-12	2016-05-14	NW1	162	crevice	i	c	1	0	0	0	0	0	90	10	0	0	0	0
2016-04-11	2016-04-12	2016-05-14	NW1	162	crevice	i	d	1	0	1	0	0	0	0	100	0	0	0	0
2016-04-11	2016-04-12	2016-05-14	NW1	162	crevice	i	e	1	0	0	0	0	0	0	100	0	0	0	0
2016-04-11	2016-04-12	2016-05-14	NW1	162	crevice	i	f	1	0	0	0	0	0	50	50	0	0	0	0
2016-04-11	2016-04-12	2016-05-14	NW1	162	crevice	i	g	1	0	0	0	0	0	90	10	0	0	0	0
2016-04-11	2016-04-12	2016-05-14	NW1	162	crevice	i	h	1	0	0	0	0	0	50	50	0	0	0	0
2016-04-11	2016-04-12	2016-05-14	NW1	162	crevice	i	i	1	0	0	0	0	0	50	50	0	0	0	0
2016-04-11	2016-04-12	2016-05-14	NW1	163	crevice	a	a	1	0	0	0	0	0	0	100	0	0	0	0
2016-04-11	2016-04-12	2016-05-14	NW1	163	crevice	a	b	1	1	37	0	0	0	0	100	0	0	0	0
2016-04-11	2016-04-12	2016-05-14	NW1	163	crevice	a	c	1	0	0	0	0	0	70	30	0	0	0	0
2016-04-11	2016-04-12	2016-05-14	NW1	163	crevice	a	d	1	1	25	0	0	0	50	50	0	0	0	0
2016-04-11	2016-04-12	2016-05-14	NW1	163	crevice	a	e	1	0	0	0	0	0	40	60	0	0	0	0
2016-04-11	2016-04-12	2016-05-14	NW1	163	crevice	a	f	1	1	22	0	0	0	50	50	0	0	0	0
2016-04-11	2016-04-12	2016-05-14	NW1	163	crevice	a	g	1	0	0	0	0	0	50	50	0	0	0	0
2016-04-11	2016-04-12	2016-05-14	NW1	163	crevice	a	h	1	1	33	0	0	0	100	0	0	0	0	0
2016-04-11	2016-04-12	2016-05-14	NW1	163	crevice	a	i	1	0	0	0	0	0	0	100	0	0	0	0
2016-04-11	2016-04-12	2016-05-14	NW1	163	crevice	b	a	1	1	12	0	0	0	0	100	0	0	0	0
2016-04-11	2016-04-12	2016-05-14	NW1	163	exposed	b	b	1	0	0	0	0	0	80	15	0	5	0	0
2016-04-11	2016-04-12	2016-05-14	NW1	163	crevice	b	c	1	1	146	0	0	15	35	35	5	5	5	0
2016-04-11	2016-04-12	2016-05-14	NW1	163	exposed	b	d	1	1	35	0	0	0	65	30	0	5	0	0
2016-04-11	2016-04-12	2016-05-14	NW1	163	crevice	b	e	1	1	142	0	0	0	0	80	20	0	0	0
2016-04-11	2016-04-12	2016-05-14	NW1	163	exposed	b	f	1	1	38	0	0	0	80	15	0	5	0	0
2016-04-11	2016-04-12	2016-05-14	NW1	163	crevice	b	g	1	1	174	0	0	0	25	60	10	5	0	0
2016-04-11	2016-04-12	2016-05-14	NW1	163	exposed	b	h	1	1	11	0	0	5	20	60	10	5	0	0
2016-04-11	2016-04-12	2016-05-14	NW1	163	exposed	b	h	2	1	22	0	0	5	20	60	10	5	0	0
2016-04-11	2016-04-12	2016-05-14	NW1	163	crevice	b	i	1	1	6	0	0	0	50	50	0	0	0	0
2016-04-11	2016-04-12	2016-05-14	NW1	163	crevice	c	a	1	0	0	0	0	0	20	80	0	0	0	0
2016-04-11	2016-04-12	2016-05-14	NW1	163	crevice	c	b	1	1	83	0	0	10	0	90	0	0	0	0
2016-04-11	2016-04-12	2016-05-14	NW1	163	exposed	c	c	1	1	22	4	1	0	45	50	0	5	0	0
2016-04-11	2016-04-12	2016-05-14	NW1	163	exposed	c	c	2	1	6	0	0	0	45	50	0	5	0	0
2016-04-11	2016-04-12	2016-05-14	NW1	163	crevice	c	d	1	0	1	0	0	20	10	50	10	10	0	0
2016-04-11	2016-04-12	2016-05-14	NW1	163	exposed	c	e	1	0	0	0	0	0	60	35	0	5	0	0
2016-04-11	2016-04-12	2016-05-14	NW1	163	crevice	c	f	1	0	0	0	0	40	5	30	20	5	0	0
2016-04-11	2016-04-12	2016-05-14	NW1	163	exposed	c	g	1	0	0	0	0	0	35	50	10	5	0	0
2016-04-11	2016-04-12	2016-05-14	NW1	163	crevice	c	h	1	0	0	0	0	20	40	35	5	0	0	0
2016-04-11	2016-04-12	2016-05-14	NW1	163	crevice	c	i	1	0	0	0	0	0	40	40	0	20	0	0
2016-04-11	2016-04-12	2016-05-14	NW1	163	crevice	d	a	1	1	14	0	0	0	0	100	0	0	0	0
2016-04-11	2016-04-12	2016-05-14	NW1	163	exposed	d	b	1	1	7	0	0	0	45	45	0	10	0	0
2016-04-11	2016-04-12	2016-05-14	NW1	163	exposed	d	b	2	0	1	0	0	0	45	45	0	10	0	0
2016-04-11	2016-04-12	2016-05-14	NW1	163	crevice	d	c	1	1	6	0	0	40	50	5	5	0	0	0
2016-04-11	2016-04-12	2016-05-14	NW1	163	exposed	d	d	1	0	1	0	0	10	35	50	0	5	0	0
2016-04-11	2016-04-12	2016-05-14	NW1	163	crevice	d	e	1	0	0	0	0	10	15	55	15	5	0	0
2016-04-11	2016-04-12	2016-05-14	NW1	163	exposed	d	f	1	0	0	0	0	0	55	40	0	5	0	0
2016-04-11	2016-04-12	2016-05-14	NW1	163	crevice	d	g	1	0	0	0	0	65	5	15	10	5	0	0
2016-04-11	2016-04-12	2016-05-14	NW1	163	exposed	d	h	1	0	1	0	0	5	70	20	0	5	0	0
2016-04-11	2016-04-12	2016-05-14	NW1	163	crevice	d	i	1	1	10	6	1	0	50	50	0	0	0	0
2016-04-11	2016-04-12	2016-05-14	NW1	163	crevice	e	a	1	0	0	0	0	0	20	80	0	0	0	0
2016-04-11	2016-04-12	2016-05-14	NW1	163	crevice	e	b	1	1	64	0	0	5	45	45	0	5	0	0
2016-04-11	2016-04-12	2016-05-14	NW1	163	exposed	e	c	1	0	0	0	0	0	55	40	0	5	0	0
2016-04-11	2016-04-12	2016-05-14	NW1	163	crevice	e	d	1	0	0	0	0	10	20	60	5	5	0	0
2016-04-11	2016-04-12	2016-05-14	NW1	163	crevice	e	f	1	0	0	0	0	5	10	70	10	5	0	0
2016-04-11	2016-04-12	2016-05-14	NW1	163	exposed	e	g	1	0	0	0	0	0	10	80	5	5	0	0
2016-04-11	2016-04-12	2016-05-14	NW1	163	crevice	e	h	1	0	0	0	0	0	0	90	5	5	0	0
2016-04-11	2016-04-12	2016-05-14	NW1	163	crevice	e	i	1	0	0	0	0	0	0	100	0	0	0	0
2016-04-11	2016-04-12	2016-05-14	NW1	163	crevice	f	a	1	1	8	0	0	0	0	100	0	0	0	0
2016-04-11	2016-04-12	2016-05-14	NW1	163	exposed	f	b	1	0	1	0	0	0	50	45	0	5	0	0
2016-04-11	2016-04-12	2016-05-14	NW1	163	exposed	f	b	2	0	1	0	0	0	50	45	0	5	0	0
2016-04-11	2016-04-12	2016-05-14	NW1	163	crevice	f	c	1	0	1	0	0	45	25	10	5	15	0	0
2016-04-11	2016-04-12	2016-05-14	NW1	163	crevice	f	c	2	0	1	0	0	45	25	10	5	15	0	0
2016-04-11	2016-04-12	2016-05-14	NW1	163	crevice	f	c	3	1	10	2	1	45	25	10	5	15	0	0
2016-04-11	2016-04-12	2016-05-14	NW1	163	exposed	f	d	1	0	0	0	0	0	75	20	0	5	0	0
2016-04-11	2016-04-12	2016-05-14	NW1	163	crevice	f	e	1	0	0	0	0	50	20	10	10	10	0	0
2016-04-11	2016-04-12	2016-05-14	NW1	163	exposed	f	f	1	0	0	0	0	20	30	30	10	10	0	0
2016-04-11	2016-04-12	2016-05-14	NW1	163	crevice	f	g	1	0	0	0	0	50	20	20	0	10	0	0
2016-04-11	2016-04-12	2016-05-14	NW1	163	exposed	f	h	1	0	0	0	0	0	50	45	0	5	0	0
2016-04-11	2016-04-12	2016-05-14	NW1	163	crevice	f	i	1	0	0	0	0	0	0	100	0	0	0	0
2016-04-11	2016-04-12	2016-05-14	NW1	163	crevice	g	a	1	0	0	0	0	0	0	80	0	20	0	0
2016-04-11	2016-04-12	2016-05-14	NW1	163	crevice	g	b	1	0	1	1	1	0	10	80	10	0	0	0
2016-04-11	2016-04-12	2016-05-14	NW1	163	exposed	g	c	1	0	0	0	0	0	80	20	0	0	0	0
2016-04-11	2016-04-12	2016-05-14	NW1	163	crevice	g	d	1	0	0	0	0	70	5	10	5	10	0	0
2016-04-11	2016-04-12	2016-05-14	NW1	163	exposed	g	e	1	0	0	0	0	5	80	10	0	5	0	0
2016-04-11	2016-04-12	2016-05-14	NW1	163	crevice	g	f	1	0	0	0	0	70	5	15	5	5	0	0
2016-04-11	2016-04-12	2016-05-14	NW1	163	exposed	g	g	1	0	0	0	0	10	35	45	0	10	0	0
2016-04-11	2016-04-12	2016-05-14	NW1	163	crevice	g	h	1	1	3	0	0	0	5	85	0	10	0	0
2016-04-11	2016-04-12	2016-05-14	NW1	163	crevice	g	h	2	0	1	0	0	0	5	85	0	10	0	0
2016-04-11	2016-04-12	2016-05-14	NW1	163	crevice	g	h	3	0	1	0	0	0	5	85	0	10	0	0
2016-04-11	2016-04-12	2016-05-14	NW1	163	crevice	g	h	4	1	12	0	0	0	5	85	0	10	0	0
2016-04-11	2016-04-12	2016-05-14	NW1	163	crevice	g	h	5	1	16	0	0	0	5	85	0	10	0	0
2016-04-11	2016-04-12	2016-05-14	NW1	163	crevice	g	i	1	0	0	0	0	0	5	85	0	10	0	0
2016-04-11	2016-04-12	2016-05-14	NW1	163	crevice	h	a	1	1	12	0	0	0	0	100	0	0	0	0
2016-04-11	2016-04-12	2016-05-14	NW1	163	exposed	h	b	1	1	2	0	0	0	49	49	0	2	0	0
2016-04-11	2016-04-12	2016-05-14	NW1	163	crevice	h	c	1	0	1	0	0	10	15	70	0	5	0	0
2016-04-11	2016-04-12	2016-05-14	NW1	163	crevice	h	c	2	1	2	0	0	10	15	70	0	5	0	0
2016-04-11	2016-04-12	2016-05-14	NW1	163	crevice	h	c	3	1	2	0	0	10	15	70	0	5	0	0
2016-04-11	2016-04-12	2016-05-14	NW1	163	crevice	h	c	4	0	1	0	0	10	15	70	0	5	0	0
2016-04-11	2016-04-12	2016-05-14	NW1	163	exposed	h	d	1	0	0	0	0	10	40	40	0	10	0	0
2016-04-11	2016-04-12	2016-05-14	NW1	163	crevice	h	e	1	0	0	0	0	0	0	95	0	5	0	0
2016-04-11	2016-04-12	2016-05-14	NW1	163	exposed	h	f	1	0	0	0	0	0	45	50	0	5	0	0
2016-04-11	2016-04-12	2016-05-14	NW1	163	crevice	h	g	1	0	1	0	0	0	0	90	10	0	0	0
2016-04-11	2016-04-12	2016-05-14	NW1	163	crevice	h	g	2	0	1	0	0	0	0	90	10	0	0	0
2016-04-11	2016-04-12	2016-05-14	NW1	163	crevice	h	g	3	0	1	0	0	0	0	90	10	0	0	0
2016-04-11	2016-04-12	2016-05-14	NW1	163	crevice	h	g	4	1	7	0	0	0	0	90	10	0	0	0
2016-04-11	2016-04-12	2016-05-14	NW1	163	exposed	h	h	1	1	2	0	0	0	75	20	0	5	0	0
2016-04-11	2016-04-12	2016-05-14	NW1	163	exposed	h	h	2	1	5	0	0	0	75	20	0	5	0	0
2016-04-11	2016-04-12	2016-05-14	NW1	163	crevice	h	i	1	1	25	0	0	0	0	100	0	0	0	0
2016-04-11	2016-04-12	2016-05-14	NW1	163	crevice	i	a	1	0	0	0	0	0	0	100	0	0	0	0
2016-04-11	2016-04-12	2016-05-14	NW1	163	crevice	i	b	1	0	0	0	0	0	0	100	0	0	0	0
2016-04-11	2016-04-12	2016-05-14	NW1	163	crevice	i	c	1	0	0	0	0	0	0	100	0	0	0	0
2016-04-11	2016-04-12	2016-05-14	NW1	163	crevice	i	d	1	0	0	0	0	0	0	100	0	0	0	0
2016-04-11	2016-04-12	2016-05-14	NW1	163	crevice	i	e	1	0	0	0	0	0	0	100	0	0	0	0
2016-04-11	2016-04-12	2016-05-14	NW1	163	crevice	i	f	1	0	0	0	0	0	0	100	0	0	0	0
2016-04-11	2016-04-12	2016-05-14	NW1	163	crevice	i	g	1	0	0	0	0	0	0	100	0	0	0	0
2016-04-11	2016-04-12	2016-05-14	NW1	163	crevice	i	h	1	0	0	0	0	0	0	100	0	0	0	0
2016-04-11	2016-04-12	2016-05-14	NW1	163	crevice	i	i	1	0	0	0	0	0	0	100	0	0	0	0
2016-04-11	2016-04-12	2016-05-14	NW1	164	crevice	a	a	1	0	0	0	0	0	40	50	5	5	0	0
2016-04-11	2016-04-12	2016-05-14	NW1	164	crevice	a	b	1	1	8	0	0	0	40	50	5	5	0	0
2016-04-11	2016-04-12	2016-05-14	NW1	164	crevice	a	c	1	0	0	0	0	0	40	50	5	5	0	0
2016-04-11	2016-04-12	2016-05-14	NW1	164	crevice	a	d	1	1	5	0	0	0	40	50	5	5	0	0
2016-04-11	2016-04-12	2016-05-14	NW1	164	crevice	a	e	1	0	0	0	0	0	40	50	5	5	0	0
2016-04-11	2016-04-12	2016-05-14	NW1	164	crevice	a	f	1	1	25	0	0	0	40	50	5	5	0	0
2016-04-11	2016-04-12	2016-05-14	NW1	164	crevice	a	g	1	0	0	0	0	0	40	50	5	5	0	0
2016-04-11	2016-04-12	2016-05-14	NW1	164	crevice	a	h	1	1	33	0	0	0	40	50	5	5	0	0
2016-04-11	2016-04-12	2016-05-14	NW1	164	crevice	a	i	1	0	0	0	0	0	40	50	5	5	0	0
2016-04-11	2016-04-12	2016-05-14	NW1	164	crevice	b	a	1	1	20	2	1	0	40	50	5	5	0	0
2016-04-11	2016-04-12	2016-05-14	NW1	164	exposed	b	b	1	0	1	0	0	0	0	90	10	0	0	0
2016-04-11	2016-04-12	2016-05-14	NW1	164	exposed	b	b	2	0	1	0	0	0	0	90	10	0	0	0
2016-04-11	2016-04-12	2016-05-14	NW1	164	crevice	b	c	1	1	59	2	1	5	5	30	55	5	0	0
2016-04-11	2016-04-12	2016-05-14	NW1	164	exposed	b	d	1	0	1	0	0	0	2	80	18	0	0	0
2016-04-11	2016-04-12	2016-05-14	NW1	164	crevice	b	e	1	1	51	0	0	0	5	75	20	0	0	0
2016-04-11	2016-04-12	2016-05-14	NW1	164	exposed	b	f	1	0	1	0	0	0	15	80	5	0	0	0
2016-04-11	2016-04-12	2016-05-14	NW1	164	exposed	b	f	2	0	1	0	0	0	15	80	5	0	0	0
2016-04-11	2016-04-12	2016-05-14	NW1	164	exposed	b	f	3	1	3	0	0	0	15	80	5	0	0	0
2016-04-11	2016-04-12	2016-05-14	NW1	164	exposed	b	f	4	1	5	0	0	0	15	80	5	0	0	0
2016-04-11	2016-04-12	2016-05-14	NW1	164	crevice	b	g	1	1	78	0	0	0	30	50	15	5	0	0
2016-04-11	2016-04-12	2016-05-14	NW1	164	exposed	b	h	1	1	17	0	0	0	70	27	3	0	0	0
2016-04-11	2016-04-12	2016-05-14	NW1	164	crevice	b	i	1	1	21	0	0	0	0	100	0	0	0	0
2016-04-11	2016-04-12	2016-05-14	NW1	164	crevice	c	a	1	0	0	0	0	0	2	70	28	0	0	0
2016-04-11	2016-04-12	2016-05-14	NW1	164	crevice	c	b	1	1	38	0	0	0	2	70	28	0	0	0
2016-04-11	2016-04-12	2016-05-14	NW1	164	exposed	c	c	1	0	0	0	0	0	2	70	28	0	0	0
2016-04-11	2016-04-12	2016-05-14	NW1	164	crevice	c	d	1	0	0	0	0	0	0	10	90	0	0	0
2016-04-11	2016-04-12	2016-05-14	NW1	164	exposed	c	e	1	0	0	0	0	0	10	25	60	5	0	0
2016-04-11	2016-04-12	2016-05-14	NW1	164	crevice	c	f	1	1	6	0	0	5	0	15	80	0	0	0
2016-04-11	2016-04-12	2016-05-14	NW1	164	crevice	c	f	2	1	6	6	1	5	0	15	80	0	0	0
2016-04-11	2016-04-12	2016-05-14	NW1	164	exposed	c	g	1	0	1	0	0	10	40	50	0	0	0	0
2016-04-11	2016-04-12	2016-05-14	NW1	164	crevice	c	h	1	1	20	1	1	0	30	40	30	0	0	0
2016-04-11	2016-04-12	2016-05-14	NW1	164	crevice	c	h	2	1	25	1	1	0	30	40	30	0	0	0
2016-04-11	2016-04-12	2016-05-14	NW1	164	crevice	c	h	3	1	34	1	1	0	30	40	30	0	0	0
2016-04-11	2016-04-12	2016-05-14	NW1	164	crevice	c	i	1	0	0	0	0	0	50	50	0	0	0	0
2016-04-11	2016-04-12	2016-05-14	NW1	164	crevice	d	a	1	1	10	1	1	0	50	50	0	0	0	0
2016-04-11	2016-04-12	2016-05-14	NW1	164	exposed	d	b	1	0	0	0	0	0	20	70	10	0	0	0
2016-04-11	2016-04-12	2016-05-14	NW1	164	crevice	d	c	1	0	0	0	0	0	0	10	90	0	0	0
2016-04-11	2016-04-12	2016-05-14	NW1	164	exposed	d	d	1	0	0	0	0	0	5	50	45	0	0	0
2016-04-11	2016-04-12	2016-05-14	NW1	164	crevice	d	e	1	0	0	0	0	0	0	10	90	0	0	0
2016-04-11	2016-04-12	2016-05-14	NW1	164	exposed	d	f	1	0	1	0	0	0	10	40	50	0	0	0
2016-04-11	2016-04-12	2016-05-14	NW1	164	crevice	d	g	1	0	0	0	0	0	5	65	30	0	0	0
2016-04-11	2016-04-12	2016-05-14	NW1	164	exposed	d	h	1	1	18	0	0	0	5	45	50	0	0	0
2016-04-11	2016-04-12	2016-05-14	NW1	164	crevice	d	i	1	1	18	0	0	0	20	50	30	0	0	0
2016-04-11	2016-04-12	2016-05-14	NW1	164	crevice	e	a	1	1	2	0	0	0	0	50	50	0	0	0
2016-04-11	2016-04-12	2016-05-14	NW1	164	crevice	e	b	1	0	1	0	0	0	0	50	50	0	0	0
2016-04-11	2016-04-12	2016-05-14	NW1	164	crevice	e	b	2	0	1	0	0	0	0	50	50	0	0	0
2016-04-11	2016-04-12	2016-05-14	NW1	164	crevice	e	b	3	1	4	0	0	0	0	50	50	0	0	0
2016-04-11	2016-04-12	2016-05-14	NW1	164	exposed	e	c	1	0	0	0	0	0	0	45	50	5	0	0
2016-04-11	2016-04-12	2016-05-14	NW1	164	crevice	e	d	1	0	1	0	0	0	0	20	80	0	0	0
2016-04-11	2016-04-12	2016-05-14	NW1	164	crevice	e	f	1	0	0	0	0	0	5	20	75	0	0	0
2016-04-11	2016-04-12	2016-05-14	NW1	164	exposed	e	g	1	0	0	0	0	0	3	40	57	0	0	0
2016-04-11	2016-04-12	2016-05-14	NW1	164	crevice	e	h	1	1	79	0	0	0	0	40	60	0	0	0
2016-04-11	2016-04-12	2016-05-14	NW1	164	crevice	e	i	1	0	0	0	0	0	0	40	60	0	0	0
2016-04-11	2016-04-12	2016-05-14	NW1	164	crevice	f	a	1	1	24	6	1	0	0	40	60	0	0	0
2016-04-11	2016-04-12	2016-05-14	NW1	164	exposed	f	b	1	0	0	0	0	0	5	45	50	0	0	0
2016-04-11	2016-04-12	2016-05-14	NW1	164	crevice	f	c	1	0	0	0	0	0	0	10	90	0	0	0
2016-04-11	2016-04-12	2016-05-14	NW1	164	exposed	f	d	1	0	0	0	0	0	0	50	50	0	0	0
2016-04-11	2016-04-12	2016-05-14	NW1	164	crevice	f	e	1	0	0	0	0	0	0	10	90	0	0	0
2016-04-11	2016-04-12	2016-05-14	NW1	164	exposed	f	f	1	0	0	0	0	0	0	50	50	0	0	0
2016-04-11	2016-04-12	2016-05-14	NW1	164	crevice	f	g	1	0	1	0	0	0	0	10	90	0	0	0
2016-04-11	2016-04-12	2016-05-14	NW1	164	exposed	f	h	1	1	16	0	0	40	5	50	5	0	0	0
2016-04-11	2016-04-12	2016-05-14	NW1	164	crevice	f	i	1	0	0	0	0	0	0	50	50	0	0	0
2016-04-11	2016-04-12	2016-05-14	NW1	164	crevice	g	a	1	1	3	0	0	0	0	10	90	0	0	0
2016-04-11	2016-04-12	2016-05-14	NW1	164	crevice	g	b	1	0	1	0	0	0	0	10	90	0	0	0
2016-04-11	2016-04-12	2016-05-14	NW1	164	exposed	g	c	1	0	0	0	0	0	0	50	50	0	0	0
2016-04-11	2016-04-12	2016-05-14	NW1	164	crevice	g	d	1	0	0	0	0	60	5	20	5	10	0	0
2016-04-11	2016-04-12	2016-05-14	NW1	164	exposed	g	e	1	0	1	0	0	25	15	40	15	5	0	0
2016-04-11	2016-04-12	2016-05-14	NW1	164	exposed	g	e	2	1	2	0	0	25	15	40	15	5	0	0
2016-04-11	2016-04-12	2016-05-14	NW1	164	crevice	g	f	1	1	40	5	1	40	10	5	40	5	0	0
2016-04-11	2016-04-12	2016-05-14	NW1	164	crevice	g	f	2	1	31	3	1	40	10	5	40	5	0	0
2016-04-11	2016-04-12	2016-05-14	NW1	164	exposed	g	g	1	0	0	0	0	5	15	60	20	0	0	0
2016-04-11	2016-04-12	2016-05-14	NW1	164	crevice	g	h	1	0	0	0	0	0	5	10	85	0	0	0
2016-04-11	2016-04-12	2016-05-14	NW1	164	crevice	g	i	1	0	0	0	0	0	5	10	85	0	0	0
2016-04-11	2016-04-12	2016-05-14	NW1	164	crevice	h	a	1	1	2	0	0	10	10	60	20	0	0	0
2016-04-11	2016-04-12	2016-05-14	NW1	164	crevice	h	a	2	0	1	1	1	10	10	60	20	0	0	0
2016-04-11	2016-04-12	2016-05-14	NW1	164	exposed	h	b	1	0	0	0	0	0	5	45	50	0	0	0
2016-04-11	2016-04-12	2016-05-14	NW1	164	crevice	h	c	1	0	0	0	0	0	0	50	50	0	0	0
2016-04-11	2016-04-12	2016-05-14	NW1	164	exposed	h	d	1	0	0	0	0	0	10	50	40	0	0	0
2016-04-11	2016-04-12	2016-05-14	NW1	164	crevice	h	e	1	1	2	0	0	0	5	40	50	5	0	0
2016-04-11	2016-04-12	2016-05-14	NW1	164	exposed	h	f	1	1	3	0	0	0	10	50	40	0	0	0
2016-04-11	2016-04-12	2016-05-14	NW1	164	crevice	h	g	1	1	5	1	1	15	15	30	30	10	0	0
2016-04-11	2016-04-12	2016-05-14	NW1	164	crevice	h	g	2	1	5	1	1	15	15	30	30	10	0	0
2016-04-11	2016-04-12	2016-05-14	NW1	164	crevice	h	g	3	1	5	1	1	15	15	30	30	10	0	0
2016-04-11	2016-04-12	2016-05-14	NW1	164	crevice	h	g	4	1	6	1	1	15	15	30	30	10	0	0
2016-04-11	2016-04-12	2016-05-14	NW1	164	crevice	h	g	5	1	10	3	1	15	15	30	30	10	0	0
2016-04-11	2016-04-12	2016-05-14	NW1	164	exposed	h	h	1	0	0	0	0	0	25	40	30	5	0	0
2016-04-11	2016-04-12	2016-05-14	NW1	164	crevice	h	i	1	0	0	0	0	0	20	40	40	0	0	0
2016-04-11	2016-04-12	2016-05-14	NW1	164	crevice	i	a	1	0	0	0	0	0	5	70	20	5	0	0
2016-04-11	2016-04-12	2016-05-14	NW1	164	crevice	i	b	1	0	0	0	0	0	5	70	20	5	0	0
2016-04-11	2016-04-12	2016-05-14	NW1	164	crevice	i	c	1	0	0	0	0	0	5	70	20	5	0	0
2016-04-11	2016-04-12	2016-05-14	NW1	164	crevice	i	d	1	0	0	0	0	0	5	70	20	5	0	0
2016-04-11	2016-04-12	2016-05-14	NW1	164	crevice	i	e	1	0	0	0	0	0	5	70	20	5	0	0
2016-04-11	2016-04-12	2016-05-14	NW1	164	crevice	i	f	1	1	4	0	0	0	5	70	20	5	0	0
2016-04-11	2016-04-12	2016-05-14	NW1	164	crevice	i	g	1	0	0	0	0	0	5	70	20	5	0	0
2016-04-11	2016-04-12	2016-05-14	NW1	164	crevice	i	h	1	1	11	0	0	0	5	70	20	5	0	0
2016-04-11	2016-04-12	2016-05-14	NW1	164	crevice	i	i	1	0	0	0	0	0	5	70	20	5	0	0
2016-04-11	2016-04-12	2016-05-14	NW1	165	crevice	a	a	1	1	8	0	0	0	100	0	0	0	0	0
2016-04-11	2016-04-12	2016-05-14	NW1	165	crevice	a	b	1	1	35	2	1	40	40	20	0	0	0	0
2016-04-11	2016-04-12	2016-05-14	NW1	165	crevice	a	c	1	1	12	4	1	5	70	20	0	5	0	0
2016-04-11	2016-04-12	2016-05-14	NW1	165	crevice	a	d	1	1	56	0	0	5	70	20	0	5	0	0
2016-04-11	2016-04-12	2016-05-14	NW1	165	crevice	a	d	2	1	30	0	0	5	70	20	0	5	0	0
2016-04-11	2016-04-12	2016-05-14	NW1	165	crevice	a	e	1	0	0	0	0	0	70	30	0	0	0	0
2016-04-11	2016-04-12	2016-05-14	NW1	165	crevice	a	f	1	1	10	0	0	0	60	40	0	0	0	0
2016-04-11	2016-04-12	2016-05-14	NW1	165	crevice	a	g	1	1	3	0	0	0	80	20	0	0	0	0
2016-04-11	2016-04-12	2016-05-14	NW1	165	crevice	a	h	1	1	25	0	0	0	80	20	0	0	0	0
2016-04-11	2016-04-12	2016-05-14	NW1	165	crevice	a	i	1	0	0	0	0	0	0	100	0	0	0	0
2016-04-11	2016-04-12	2016-05-14	NW1	165	crevice	b	a	1	1	23	0	0	0	45	45	0	10	0	0
2016-04-11	2016-04-12	2016-05-14	NW1	165	exposed	b	b	1	1	32	0	0	10	70	15	0	5	0	0
2016-04-11	2016-04-12	2016-05-14	NW1	165	crevice	b	c	1	1	15	0	0	0	40	55	5	0	0	0
2016-04-11	2016-04-12	2016-05-14	NW1	165	crevice	b	c	2	0	1	0	0	0	40	55	5	0	0	0
2016-04-11	2016-04-12	2016-05-14	NW1	165	crevice	b	c	3	0	1	0	0	0	40	55	5	0	0	0
2016-04-11	2016-04-12	2016-05-14	NW1	165	crevice	b	c	4	1	17	0	0	0	40	55	5	0	0	0
2016-04-11	2016-04-12	2016-05-14	NW1	165	exposed	b	d	1	1	2	0	0	2	40	50	3	5	0	0
2016-04-11	2016-04-12	2016-05-14	NW1	165	exposed	b	d	2	0	1	0	0	2	40	50	3	5	0	0
2016-04-11	2016-04-12	2016-05-14	NW1	165	crevice	b	e	1	1	92	0	0	0	5	85	5	5	0	0
2016-04-11	2016-04-12	2016-05-14	NW1	165	crevice	b	e	2	1	3	0	0	0	5	85	5	5	0	0
2016-04-11	2016-04-12	2016-05-14	NW1	165	exposed	b	f	1	0	1	0	0	0	55	25	0	20	0	0
2016-04-11	2016-04-12	2016-05-14	NW1	165	exposed	b	f	2	1	2	0	0	0	55	25	0	20	0	0
2016-04-11	2016-04-12	2016-05-14	NW1	165	crevice	b	g	1	1	100	0	0	5	0	85	5	5	0	0
2016-04-11	2016-04-12	2016-05-14	NW1	165	exposed	b	h	1	0	0	0	0	5	10	80	5	0	0	0
2016-04-11	2016-04-12	2016-05-14	NW1	165	crevice	b	i	1	1	12	0	0	0	80	10	0	10	0	0
2016-04-11	2016-04-12	2016-05-14	NW1	165	crevice	c	a	1	0	0	0	0	20	60	0	0	20	0	0
2016-04-11	2016-04-12	2016-05-14	NW1	165	crevice	c	b	1	1	122	0	0	10	5	70	0	10	5	0
2016-04-11	2016-04-12	2016-05-14	NW1	165	exposed	c	c	1	0	0	0	0	0	50	20	0	30	0	0
2016-04-11	2016-04-12	2016-05-14	NW1	165	crevice	c	d	1	0	0	0	0	80	0	10	10	0	0	0
2016-04-11	2016-04-12	2016-05-14	NW1	165	exposed	c	e	1	0	0	0	0	0	30	60	0	10	0	0
2016-04-11	2016-04-12	2016-05-14	NW1	165	crevice	c	f	1	0	0	0	0	40	0	20	40	0	0	0
2016-04-11	2016-04-12	2016-05-14	NW1	165	exposed	c	g	1	0	1	0	0	5	35	50	0	10	0	0
2016-04-11	2016-04-12	2016-05-14	NW1	165	exposed	c	g	2	0	1	0	0	5	35	50	0	10	0	0
2016-04-11	2016-04-12	2016-05-14	NW1	165	crevice	c	h	1	1	2	0	0	15	5	65	5	10	0	0
2016-04-11	2016-04-12	2016-05-14	NW1	165	crevice	c	h	2	0	1	0	0	15	5	65	5	10	0	0
2016-04-11	2016-04-12	2016-05-14	NW1	165	crevice	c	h	3	1	15	0	0	15	5	65	5	10	0	0
2016-04-11	2016-04-12	2016-05-14	NW1	165	crevice	c	h	4	0	1	0	0	15	5	65	5	10	0	0
2016-04-11	2016-04-12	2016-05-14	NW1	165	crevice	c	h	5	0	1	0	0	15	5	65	5	10	0	0
2016-04-11	2016-04-12	2016-05-14	NW1	165	crevice	c	h	6	0	1	0	0	15	5	65	5	10	0	0
2016-04-11	2016-04-12	2016-05-14	NW1	165	crevice	c	h	7	1	6	0	0	15	5	65	5	10	0	0
2016-04-11	2016-04-12	2016-05-14	NW1	165	crevice	c	h	8	1	46	2	1	15	5	65	5	10	0	0
2016-04-11	2016-04-12	2016-05-14	NW1	165	crevice	c	i	1	0	0	0	0	0	80	0	0	20	0	0
2016-04-11	2016-04-12	2016-05-14	NW1	165	crevice	d	a	1	1	32	0	0	20	60	5	0	15	0	0
2016-04-11	2016-04-12	2016-05-14	NW1	165	exposed	d	b	1	1	2	0	0	20	30	40	0	10	0	0
2016-04-11	2016-04-12	2016-05-14	NW1	165	exposed	d	b	2	1	4	0	0	20	30	40	0	10	0	0
2016-04-11	2016-04-12	2016-05-14	NW1	165	exposed	d	b	3	1	4	0	0	20	30	40	0	10	0	0
2016-04-11	2016-04-12	2016-05-14	NW1	165	exposed	d	b	4	0	1	0	0	20	30	40	0	10	0	0
2016-04-11	2016-04-12	2016-05-14	NW1	165	crevice	d	c	1	0	0	0	0	50	5	40	5	0	0	0
2016-04-11	2016-04-12	2016-05-14	NW1	165	exposed	d	d	1	0	0	0	0	5	65	15	0	15	0	0
2016-04-11	2016-04-12	2016-05-14	NW1	165	crevice	d	e	1	0	0	0	0	60	10	20	5	5	0	0
2016-04-11	2016-04-12	2016-05-14	NW1	165	exposed	d	f	1	0	0	0	0	5	25	65	0	5	0	0
2016-04-11	2016-04-12	2016-05-14	NW1	165	crevice	d	g	1	0	0	0	0	20	5	65	5	5	0	0
2016-04-11	2016-04-12	2016-05-14	NW1	165	exposed	d	h	1	0	0	0	0	5	60	30	0	5	0	0
2016-04-11	2016-04-12	2016-05-14	NW1	165	crevice	d	i	1	1	6	0	0	0	80	15	0	5	0	0
2016-04-11	2016-04-12	2016-05-14	NW1	165	crevice	e	a	1	0	0	0	0	0	0	80	0	20	0	0
2016-04-11	2016-04-12	2016-05-14	NW1	165	crevice	e	b	1	1	58	0	0	0	0	95	0	5	0	0
2016-04-11	2016-04-12	2016-05-14	NW1	165	exposed	e	c	1	0	0	0	0	10	40	45	0	5	0	0
2016-04-11	2016-04-12	2016-05-14	NW1	165	crevice	e	d	1	0	0	0	0	40	10	45	0	5	0	0
2016-04-11	2016-04-12	2016-05-14	NW1	165	crevice	e	f	1	0	1	0	0	40	10	45	0	5	0	0
2016-04-11	2016-04-12	2016-05-14	NW1	165	exposed	e	g	1	0	0	0	0	10	5	80	0	5	0	0
2016-04-11	2016-04-12	2016-05-14	NW1	165	crevice	e	h	1	0	1	0	0	15	55	25	0	5	0	0
2016-04-11	2016-04-12	2016-05-14	NW1	165	crevice	e	h	2	0	1	0	0	15	55	25	0	5	0	0
2016-04-11	2016-04-12	2016-05-14	NW1	165	crevice	e	h	3	0	1	0	0	15	55	25	0	5	0	0
2016-04-11	2016-04-12	2016-05-14	NW1	165	crevice	e	h	4	1	8	0	0	15	55	25	0	5	0	0
2016-04-11	2016-04-12	2016-05-14	NW1	165	crevice	e	i	1	1	4	0	0	15	55	25	0	5	0	0
2016-04-11	2016-04-12	2016-05-14	NW1	165	crevice	f	a	1	1	8	0	0	0	0	100	0	0	0	0
2016-04-11	2016-04-12	2016-05-14	NW1	165	exposed	f	b	1	1	6	0	0	10	80	10	0	0	0	0
2016-04-11	2016-04-12	2016-05-14	NW1	165	crevice	f	c	1	0	0	0	0	40	5	50	0	5	0	0
2016-04-11	2016-04-12	2016-05-14	NW1	165	exposed	f	d	1	0	0	0	0	5	45	45	0	5	0	0
2016-04-11	2016-04-12	2016-05-14	NW1	165	crevice	f	e	1	0	0	0	0	10	0	85	0	5	0	0
2016-04-11	2016-04-12	2016-05-14	NW1	165	exposed	f	f	1	0	0	0	0	10	15	70	0	5	0	0
2016-04-11	2016-04-12	2016-05-14	NW1	165	crevice	f	g	1	0	0	0	0	10	5	80	0	5	0	0
2016-04-11	2016-04-12	2016-05-14	NW1	165	exposed	f	h	1	0	0	0	0	5	45	45	0	5	0	0
2016-04-11	2016-04-12	2016-05-14	NW1	165	crevice	f	i	1	1	7	0	0	15	55	25	0	5	0	0
2016-04-11	2016-04-12	2016-05-14	NW1	165	crevice	g	a	1	0	0	0	0	5	95	0	0	0	0	0
2016-04-11	2016-04-12	2016-05-14	NW1	165	crevice	g	b	1	1	37	0	0	5	15	77	0	3	0	0
2016-04-11	2016-04-12	2016-05-14	NW1	165	crevice	g	b	2	1	44	0	0	5	15	77	0	3	0	0
2016-04-11	2016-04-12	2016-05-14	NW1	165	exposed	g	c	1	0	0	0	0	10	15	70	0	5	0	0
2016-04-11	2016-04-12	2016-05-14	NW1	165	crevice	g	d	1	0	0	0	0	40	5	50	0	5	0	0
2016-04-11	2016-04-12	2016-05-14	NW1	165	exposed	g	e	1	0	0	0	0	10	5	75	0	10	0	0
2016-04-11	2016-04-12	2016-05-14	NW1	165	crevice	g	f	1	0	0	0	0	25	5	70	0	0	0	0
2016-04-11	2016-04-12	2016-05-14	NW1	165	exposed	g	g	1	0	0	0	0	10	20	60	0	10	0	0
2016-04-11	2016-04-12	2016-05-14	NW1	165	crevice	g	h	1	1	4	3	1	5	5	80	5	5	0	0
2016-04-11	2016-04-12	2016-05-14	NW1	165	crevice	g	h	2	0	1	1	1	5	5	80	5	5	0	0
2016-04-11	2016-04-12	2016-05-14	NW1	165	crevice	g	h	3	0	1	0	0	5	5	80	5	5	0	0
2016-04-11	2016-04-12	2016-05-14	NW1	165	crevice	g	h	4	1	2	0	0	5	5	80	5	5	0	0
2016-04-11	2016-04-12	2016-05-14	NW1	165	crevice	g	h	5	1	22	1	1	5	5	80	5	5	0	0
2016-04-11	2016-04-12	2016-05-14	NW1	165	crevice	g	i	1	1	5	0	0	0	5	95	0	0	0	0
2016-04-11	2016-04-12	2016-05-14	NW1	165	crevice	h	a	1	0	0	0	0	20	60	20	0	0	0	0
2016-04-11	2016-04-12	2016-05-14	NW1	165	exposed	h	b	1	1	15	0	0	30	30	30	0	10	0	0
2016-04-11	2016-04-12	2016-05-14	NW1	165	exposed	h	b	2	0	1	0	0	30	30	30	0	10	0	0
2016-04-11	2016-04-12	2016-05-14	NW1	165	exposed	h	b	3	0	1	0	0	30	30	30	0	10	0	0
2016-04-11	2016-04-12	2016-05-14	NW1	165	crevice	h	c	1	0	0	0	0	5	25	60	0	10	0	0
2016-04-11	2016-04-12	2016-05-14	NW1	165	exposed	h	d	1	0	0	0	0	5	60	30	0	5	0	0
2016-04-11	2016-04-12	2016-05-14	NW1	165	crevice	h	e	1	0	0	0	0	5	0	90	0	5	0	0
2016-04-11	2016-04-12	2016-05-14	NW1	165	exposed	h	f	1	0	0	0	0	25	25	25	0	25	0	0
2016-04-11	2016-04-12	2016-05-14	NW1	165	crevice	h	g	1	0	0	0	0	15	50	20	0	15	0	0
2016-04-11	2016-04-12	2016-05-14	NW1	165	exposed	h	h	1	0	1	0	0	10	70	10	0	10	0	0
2016-04-11	2016-04-12	2016-05-14	NW1	165	crevice	h	i	1	1	18	12	1	0	50	50	0	0	0	0
2016-04-11	2016-04-12	2016-05-14	NW1	165	crevice	i	a	1	1	13	0	0	50	50	0	0	0	0	0
2016-04-11	2016-04-12	2016-05-14	NW1	165	crevice	i	b	1	0	0	0	0	20	10	70	0	0	0	0
2016-04-11	2016-04-12	2016-05-14	NW1	165	crevice	i	c	1	0	0	0	0	10	30	30	0	30	0	0
2016-04-11	2016-04-12	2016-05-14	NW1	165	crevice	i	d	1	0	0	0	0	10	30	30	0	30	0	0
2016-04-11	2016-04-12	2016-05-14	NW1	165	crevice	i	e	1	0	0	0	0	10	30	30	0	30	0	0
2016-04-11	2016-04-12	2016-05-14	NW1	165	crevice	i	f	1	0	0	0	0	10	30	30	0	30	0	0
2016-04-11	2016-04-12	2016-05-14	NW1	165	crevice	i	g	1	0	0	0	0	0	70	0	0	30	0	0
2016-04-11	2016-04-12	2016-05-14	NW1	165	crevice	i	h	1	0	0	0	0	0	5	95	0	0	0	0
2016-04-11	2016-04-12	2016-05-14	NW1	165	crevice	i	i	1	0	0	0	0	0	0	100	0	0	0	0
2016-04-11	2016-04-12	2016-06-16	CB2	171	crevice	a	a	1	0	1	0	0	0	0	100	0	0	0	0
2016-04-11	2016-04-12	2016-06-16	CB2	171	crevice	a	a	2	0	1	0	0	0	0	100	0	0	0	0
2016-04-11	2016-04-12	2016-06-16	CB2	171	crevice	a	a	3	0	1	0	0	0	0	100	0	0	0	0
2016-04-11	2016-04-12	2016-06-16	CB2	171	crevice	a	a	4	0	1	0	0	0	0	100	0	0	0	0
2016-04-11	2016-04-12	2016-06-16	CB2	171	crevice	a	b	1	1	10	0	0	0	0	100	0	0	0	0
2016-04-11	2016-04-12	2016-06-16	CB2	171	crevice	a	c	1	0	0	0	0	0	80	20	0	0	0	0
2016-04-11	2016-04-12	2016-06-16	CB2	171	crevice	a	d	1	1	20	0	0	50	50	0	0	0	0	0
2016-04-11	2016-04-12	2016-06-16	CB2	171	crevice	a	e	1	0	1	1	1	50	40	10	0	0	0	0
2016-04-11	2016-04-12	2016-06-16	CB2	171	crevice	a	f	1	1	4	0	0	30	60	10	0	0	0	0
2016-04-11	2016-04-12	2016-06-16	CB2	171	crevice	a	g	1	0	0	0	0	10	70	20	0	0	0	0
2016-04-11	2016-04-12	2016-06-16	CB2	171	crevice	a	h	1	1	7	1	1	10	20	70	0	0	0	0
2016-04-11	2016-04-12	2016-06-16	CB2	171	crevice	a	i	1	0	0	0	0	0	0	100	0	0	0	0
2016-04-11	2016-04-12	2016-06-16	CB2	171	crevice	b	a	1	0	1	0	0	0	0	100	0	0	0	0
2016-04-11	2016-04-12	2016-06-16	CB2	171	crevice	b	a	2	0	1	0	0	0	0	100	0	0	0	0
2016-04-11	2016-04-12	2016-06-16	CB2	171	crevice	b	a	3	0	1	0	0	0	0	100	0	0	0	0
2016-04-11	2016-04-12	2016-06-16	CB2	171	crevice	b	a	4	0	1	0	0	0	0	100	0	0	0	0
2016-04-11	2016-04-12	2016-06-16	CB2	171	exposed	b	b	1	0	1	0	0	5	75	10	0	10	0	0
2016-04-11	2016-04-12	2016-06-16	CB2	171	exposed	b	b	2	0	1	1	1	5	75	10	0	10	0	0
2016-04-11	2016-04-12	2016-06-16	CB2	171	crevice	b	c	1	1	20	2	1	0	10	90	0	0	0	0
2016-04-11	2016-04-12	2016-06-16	CB2	171	crevice	b	c	2	1	13	1	1	0	10	90	0	0	0	0
2016-04-11	2016-04-12	2016-06-16	CB2	171	exposed	b	d	1	0	1	1	1	60	30	10	0	0	0	0
2016-04-11	2016-04-12	2016-06-16	CB2	171	exposed	b	d	2	0	1	0	0	60	30	10	0	0	0	0
2016-04-11	2016-04-12	2016-06-16	CB2	171	crevice	b	e	1	0	1	0	0	0	10	90	0	0	0	0
2016-04-11	2016-04-12	2016-06-16	CB2	171	exposed	b	f	1	0	0	0	0	20	60	20	0	0	0	0
2016-04-11	2016-04-12	2016-06-16	CB2	171	crevice	b	g	1	1	4	0	0	0	5	85	0	10	0	0
2016-04-11	2016-04-12	2016-06-16	CB2	171	exposed	b	h	1	0	0	0	0	40	40	0	0	20	0	0
2016-04-11	2016-04-12	2016-06-16	CB2	171	crevice	b	i	1	0	0	0	0	50	50	0	0	0	0	0
2016-04-11	2016-04-12	2016-06-16	CB2	171	crevice	c	a	1	0	0	0	0	50	50	0	0	0	0	0
2016-04-11	2016-04-12	2016-06-16	CB2	171	crevice	c	b	1	1	60	0	0	0	30	70	0	0	0	0
2016-04-11	2016-04-12	2016-06-16	CB2	171	exposed	c	c	1	0	1	0	0	0	80	10	0	10	0	0
2016-04-11	2016-04-12	2016-06-16	CB2	171	exposed	c	c	2	0	1	0	0	0	80	10	0	10	0	0
2016-04-11	2016-04-12	2016-06-16	CB2	171	crevice	c	d	1	0	0	0	0	0	0	100	0	0	0	0
2016-04-11	2016-04-12	2016-06-16	CB2	171	exposed	c	e	1	0	0	0	0	0	80	10	0	10	0	0
2016-04-11	2016-04-12	2016-06-16	CB2	171	crevice	c	f	1	0	0	0	0	0	0	100	0	0	0	0
2016-04-11	2016-04-12	2016-06-16	CB2	171	exposed	c	g	1	0	0	0	0	0	70	10	0	20	0	0
2016-04-11	2016-04-12	2016-06-16	CB2	171	crevice	c	h	1	0	0	0	0	0	50	50	0	0	0	0
2016-04-11	2016-04-12	2016-06-16	CB2	171	crevice	c	i	1	0	0	0	0	0	90	10	0	0	0	0
2016-04-11	2016-04-12	2016-06-16	CB2	171	crevice	d	a	1	1	9	0	0	0	50	50	0	0	0	0
2016-04-11	2016-04-12	2016-06-16	CB2	171	exposed	d	b	1	1	10	2	1	10	60	30	0	0	0	0
2016-04-11	2016-04-12	2016-06-16	CB2	171	crevice	d	c	1	0	0	0	0	0	0	100	0	0	0	0
2016-04-11	2016-04-12	2016-06-16	CB2	171	exposed	d	d	1	0	0	0	0	0	90	5	0	5	0	0
2016-04-11	2016-04-12	2016-06-16	CB2	171	crevice	d	e	1	0	0	0	0	0	0	100	0	0	0	0
2016-04-11	2016-04-12	2016-06-16	CB2	171	exposed	d	f	1	0	0	0	0	40	50	5	0	5	0	0
2016-04-11	2016-04-12	2016-06-16	CB2	171	crevice	d	g	1	0	0	0	0	0	5	95	0	0	0	0
2016-04-11	2016-04-12	2016-06-16	CB2	171	exposed	d	h	1	0	0	0	0	10	80	10	0	0	0	0
2016-04-11	2016-04-12	2016-06-16	CB2	171	crevice	d	i	1	1	10	0	0	50	40	10	0	0	0	0
2016-04-11	2016-04-12	2016-06-16	CB2	171	crevice	e	a	1	0	0	0	0	0	60	40	0	0	0	0
2016-04-11	2016-04-12	2016-06-16	CB2	171	crevice	e	b	1	1	28	0	0	0	30	40	0	10	20	0
2016-04-11	2016-04-12	2016-06-16	CB2	171	exposed	e	c	1	1	2	0	0	10	80	5	0	5	0	0
2016-04-11	2016-04-12	2016-06-16	CB2	171	crevice	e	d	1	0	0	0	0	0	0	100	0	0	0	0
2016-04-11	2016-04-12	2016-06-16	CB2	171	crevice	e	f	1	0	0	0	0	0	0	100	0	0	0	0
2016-04-11	2016-04-12	2016-06-16	CB2	171	exposed	e	g	1	0	0	0	0	0	50	10	0	40	0	0
2016-04-11	2016-04-12	2016-06-16	CB2	171	crevice	e	h	1	0	0	0	0	0	10	90	0	0	0	0
2016-04-11	2016-04-12	2016-06-16	CB2	171	crevice	e	i	1	0	0	0	0	0	80	20	0	0	0	0
2016-04-11	2016-04-12	2016-06-16	CB2	171	crevice	f	a	1	1	19	0	0	0	50	50	0	0	0	0
2016-04-11	2016-04-12	2016-06-16	CB2	171	exposed	f	b	1	1	13	0	0	0	70	15	0	15	0	0
2016-04-11	2016-04-12	2016-06-16	CB2	171	crevice	f	c	1	0	0	0	0	0	0	100	0	0	0	0
2016-04-11	2016-04-12	2016-06-16	CB2	171	exposed	f	d	1	0	0	0	0	0	40	10	0	50	0	0
2016-04-11	2016-04-12	2016-06-16	CB2	171	crevice	f	e	1	0	0	0	0	0	10	90	0	0	0	0
2016-04-11	2016-04-12	2016-06-16	CB2	171	exposed	f	f	1	0	0	0	0	0	40	10	0	50	0	0
2016-04-11	2016-04-12	2016-06-16	CB2	171	crevice	f	g	1	0	0	0	0	0	0	100	0	0	0	0
2016-04-11	2016-04-12	2016-06-16	CB2	171	exposed	f	h	1	0	0	0	0	10	50	10	0	30	0	0
2016-04-11	2016-04-12	2016-06-16	CB2	171	crevice	f	i	1	1	20	0	0	0	60	40	0	0	0	0
2016-04-11	2016-04-12	2016-06-16	CB2	171	crevice	g	a	1	0	0	0	0	0	40	20	0	40	0	0
2016-04-11	2016-04-12	2016-06-16	CB2	171	crevice	g	b	1	1	30	15	1	0	30	65	0	0	5	0
2016-04-11	2016-04-12	2016-06-16	CB2	171	exposed	g	c	1	1	5	2	1	5	80	5	0	10	0	0
2016-04-11	2016-04-12	2016-06-16	CB2	171	exposed	g	c	2	1	5	2	1	5	80	5	0	10	0	0
2016-04-11	2016-04-12	2016-06-16	CB2	171	exposed	g	c	3	1	5	4	1	5	80	5	0	10	0	0
2016-04-11	2016-04-12	2016-06-16	CB2	171	crevice	g	d	1	0	0	0	0	0	0	100	0	0	0	0
2016-04-11	2016-04-12	2016-06-16	CB2	171	exposed	g	e	1	0	0	0	0	10	60	10	0	20	0	0
2016-04-11	2016-04-12	2016-06-16	CB2	171	crevice	g	f	1	0	0	0	0	0	0	100	0	0	0	0
2016-04-11	2016-04-12	2016-06-16	CB2	171	exposed	g	g	1	0	0	0	0	10	60	15	0	15	0	0
2016-04-11	2016-04-12	2016-06-16	CB2	171	crevice	g	h	1	1	43	0	0	0	5	95	0	0	0	0
2016-04-11	2016-04-12	2016-06-16	CB2	171	crevice	g	i	1	0	0	0	0	0	40	60	0	0	0	0
2016-04-11	2016-04-12	2016-06-16	CB2	171	crevice	h	a	1	1	24	0	0	0	50	50	0	0	0	0
2016-04-11	2016-04-12	2016-06-16	CB2	171	exposed	h	b	1	1	4	0	0	10	85	0	0	5	0	0
2016-04-11	2016-04-12	2016-06-16	CB2	171	exposed	h	b	2	1	1	0	0	10	85	0	0	5	0	0
2016-04-11	2016-04-12	2016-06-16	CB2	171	exposed	h	b	3	1	1	0	0	10	85	0	0	5	0	0
2016-04-11	2016-04-12	2016-06-16	CB2	171	exposed	h	b	4	1	11	0	0	10	85	0	0	5	0	0
2016-04-11	2016-04-12	2016-06-16	CB2	171	exposed	h	b	5	1	3	0	0	10	85	0	0	5	0	0
2016-04-11	2016-04-12	2016-06-16	CB2	171	crevice	h	c	1	1	79	0	0	0	70	25	0	5	0	0
2016-04-11	2016-04-12	2016-06-16	CB2	171	exposed	h	d	1	1	9	8	1	0	90	5	0	5	0	0
2016-04-11	2016-04-12	2016-06-16	CB2	171	exposed	h	d	2	1	2	0	0	0	90	5	0	5	0	0
2016-04-11	2016-04-12	2016-06-16	CB2	171	exposed	h	d	3	1	2	0	0	0	90	5	0	5	0	0
2016-04-11	2016-04-12	2016-06-16	CB2	171	crevice	h	e	1	1	91	0	0	0	20	70	0	10	0	0
2016-04-11	2016-04-12	2016-06-16	CB2	171	exposed	h	f	1	1	5	1	1	0	90	5	0	5	0	0
2016-04-11	2016-04-12	2016-06-16	CB2	171	exposed	h	f	2	1	4	1	1	0	90	5	0	5	0	0
2016-04-11	2016-04-12	2016-06-16	CB2	171	exposed	h	f	3	1	3	1	1	0	90	5	0	5	0	0
2016-04-11	2016-04-12	2016-06-16	CB2	171	crevice	h	g	1	1	110	0	0	0	20	60	0	20	0	0
2016-04-11	2016-04-12	2016-06-16	CB2	171	exposed	h	h	1	1	54	0	0	10	60	5	0	25	0	0
2016-04-11	2016-04-12	2016-06-16	CB2	171	crevice	h	i	1	0	0	0	0	0	50	50	0	0	0	0
2016-04-11	2016-04-12	2016-06-16	CB2	171	crevice	i	a	1	0	0	0	0	0	100	0	0	0	0	0
2016-04-11	2016-04-12	2016-06-16	CB2	171	crevice	i	b	1	1	15	0	0	0	50	50	0	0	0	0
2016-04-11	2016-04-12	2016-06-16	CB2	171	crevice	i	c	1	0	0	0	0	0	90	10	0	0	0	0
2016-04-11	2016-04-12	2016-06-16	CB2	171	crevice	i	d	1	0	0	0	0	0	90	10	0	0	0	0
2016-04-11	2016-04-12	2016-06-16	CB2	171	crevice	i	e	1	0	0	0	0	0	100	0	0	0	0	0
2016-04-11	2016-04-12	2016-06-16	CB2	171	crevice	i	f	1	1	15	0	0	0	50	50	0	0	0	0
2016-04-11	2016-04-12	2016-06-16	CB2	171	crevice	i	g	1	0	0	0	0	0	80	20	0	0	0	0
2016-04-11	2016-04-12	2016-06-16	CB2	171	crevice	i	h	1	1	20	0	0	0	50	50	0	0	0	0
2016-04-11	2016-04-12	2016-06-16	CB2	171	crevice	i	i	1	0	0	0	0	0	50	50	0	0	0	0
2016-04-11	2016-04-12	2016-06-16	CB2	172	crevice	a	a	1	0	0	0	0	0	50	50	0	0	0	0
2016-04-11	2016-04-12	2016-06-16	CB2	172	crevice	a	b	1	1	36	0	0	0	30	50	0	20	0	0
2016-04-11	2016-04-12	2016-06-16	CB2	172	crevice	a	c	1	0	0	0	0	0	100	0	0	0	0	0
2016-04-11	2016-04-12	2016-06-16	CB2	172	crevice	a	d	1	1	19	0	0	0	80	10	0	10	0	0
2016-04-11	2016-04-12	2016-06-16	CB2	172	crevice	a	e	1	0	0	0	0	0	100	0	0	0	0	0
2016-04-11	2016-04-12	2016-06-16	CB2	172	crevice	a	f	1	1	16	0	0	0	50	40	0	10	0	0
2016-04-11	2016-04-12	2016-06-16	CB2	172	crevice	a	g	1	0	0	0	0	0	80	10	0	10	0	0
2016-04-11	2016-04-12	2016-06-16	CB2	172	crevice	a	h	1	0	0	0	0	0	0	100	0	0	0	0
2016-04-11	2016-04-12	2016-06-16	CB2	172	crevice	a	i	1	0	1	1	1	0	0	100	0	0	0	0
2016-04-11	2016-04-12	2016-06-16	CB2	172	crevice	b	a	1	0	0	0	0	0	50	50	0	0	0	0
2016-04-11	2016-04-12	2016-06-16	CB2	172	exposed	b	b	1	0	1	0	0	10	60	15	0	15	0	0
2016-04-11	2016-04-12	2016-06-16	CB2	172	crevice	b	c	1	1	65	0	0	0	30	20	0	50	0	0
2016-04-11	2016-04-12	2016-06-16	CB2	172	exposed	b	d	1	1	3	3	1	40	40	0	0	20	0	0
2016-04-11	2016-04-12	2016-06-16	CB2	172	crevice	b	e	1	1	38	6	1	10	40	30	0	20	0	0
2016-04-11	2016-04-12	2016-06-16	CB2	172	exposed	b	f	1	1	14	3	1	0	70	10	0	20	0	0
2016-04-11	2016-04-12	2016-06-16	CB2	172	crevice	b	g	1	1	39	15	1	0	60	20	0	20	0	0
2016-04-11	2016-04-12	2016-06-16	CB2	172	exposed	b	h	1	0	0	0	0	0	50	0	0	50	0	0
2016-04-11	2016-04-12	2016-06-16	CB2	172	crevice	b	i	1	1	16	18	1	0	80	0	0	20	0	0
2016-04-11	2016-04-12	2016-06-16	CB2	172	crevice	c	a	1	0	0	0	0	0	50	0	0	50	0	0
2016-04-11	2016-04-12	2016-06-16	CB2	172	crevice	c	b	1	1	2	1	1	0	40	20	0	40	0	0
2016-04-11	2016-04-12	2016-06-16	CB2	172	crevice	c	b	2	0	1	1	1	0	40	20	0	40	0	0
2016-04-11	2016-04-12	2016-06-16	CB2	172	exposed	c	c	1	0	0	0	0	0	70	10	0	20	0	0
2016-04-11	2016-04-12	2016-06-16	CB2	172	crevice	c	d	1	0	0	0	0	5	0	90	5	0	0	0
2016-04-11	2016-04-12	2016-06-16	CB2	172	exposed	c	e	1	0	0	0	0	0	60	10	0	30	0	0
2016-04-11	2016-04-12	2016-06-16	CB2	172	crevice	c	f	1	0	0	0	0	0	5	80	5	10	0	0
2016-04-11	2016-04-12	2016-06-16	CB2	172	exposed	c	g	1	0	0	0	0	5	70	5	0	20	0	0
2016-04-11	2016-04-12	2016-06-16	CB2	172	crevice	c	h	1	1	26	0	0	0	15	30	0	55	0	0
2016-04-11	2016-04-12	2016-06-16	CB2	172	crevice	c	i	1	0	0	0	0	0	80	20	0	0	0	0
2016-04-11	2016-04-12	2016-06-16	CB2	172	crevice	d	a	1	0	0	0	0	0	50	50	0	0	0	0
2016-04-11	2016-04-12	2016-06-16	CB2	172	exposed	d	b	1	0	0	0	0	0	80	0	0	20	0	0
2016-04-11	2016-04-12	2016-06-16	CB2	172	crevice	d	c	1	0	0	0	0	0	0	90	10	0	0	0
2016-04-11	2016-04-12	2016-06-16	CB2	172	exposed	d	d	1	0	0	0	0	20	70	5	0	5	0	0
2016-04-11	2016-04-12	2016-06-16	CB2	172	crevice	d	e	1	0	1	0	0	20	5	70	0	5	0	0
2016-04-11	2016-04-12	2016-06-16	CB2	172	exposed	d	f	1	0	0	0	0	10	50	20	0	20	0	0
2016-04-11	2016-04-12	2016-06-16	CB2	172	crevice	d	g	1	0	0	0	0	0	10	80	5	5	0	0
2016-04-11	2016-04-12	2016-06-16	CB2	172	exposed	d	h	1	0	0	0	0	0	60	10	0	30	0	0
2016-04-11	2016-04-12	2016-06-16	CB2	172	crevice	d	i	1	0	0	0	0	0	80	10	0	10	0	0
2016-04-11	2016-04-12	2016-06-16	CB2	172	crevice	e	a	1	0	0	0	0	0	80	10	0	10	0	0
2016-04-11	2016-04-12	2016-06-16	CB2	172	crevice	e	b	1	0	0	0	0	0	20	40	0	40	0	0
2016-04-11	2016-04-12	2016-06-16	CB2	172	exposed	e	c	1	0	0	0	0	0	70	5	0	25	0	0
2016-04-11	2016-04-12	2016-06-16	CB2	172	crevice	e	d	1	0	0	0	0	0	0	100	0	0	0	0
2016-04-11	2016-04-12	2016-06-16	CB2	172	crevice	e	f	1	0	0	0	0	0	0	100	0	0	0	0
2016-04-11	2016-04-12	2016-06-16	CB2	172	exposed	e	g	1	0	1	0	0	0	70	0	0	30	0	0
2016-04-11	2016-04-12	2016-06-16	CB2	172	crevice	e	h	1	1	12	7	1	0	30	20	0	50	0	0
2016-04-11	2016-04-12	2016-06-16	CB2	172	crevice	e	h	2	1	8	10	1	0	30	20	0	50	0	0
2016-04-11	2016-04-12	2016-06-16	CB2	172	crevice	e	i	1	0	0	0	0	0	100	0	0	0	0	0
2016-04-11	2016-04-12	2016-06-16	CB2	172	crevice	f	a	1	1	21	0	0	0	50	50	0	0	0	0
2016-04-11	2016-04-12	2016-06-16	CB2	172	exposed	f	b	1	0	0	0	0	0	70	10	0	20	0	0
2016-04-11	2016-04-12	2016-06-16	CB2	172	crevice	f	c	1	0	0	0	0	0	0	100	0	0	0	0
2016-04-11	2016-04-12	2016-06-16	CB2	172	exposed	f	d	1	0	0	0	0	0	90	5	0	5	0	0
2016-04-11	2016-04-12	2016-06-16	CB2	172	crevice	f	e	1	0	0	0	0	0	0	100	0	0	0	0
2016-04-11	2016-04-12	2016-06-16	CB2	172	exposed	f	f	1	0	0	0	0	10	60	0	0	30	0	0
2016-04-11	2016-04-12	2016-06-16	CB2	172	crevice	f	g	1	1	3	0	0	0	10	80	0	10	0	0
2016-04-11	2016-04-12	2016-06-16	CB2	172	exposed	f	h	1	0	0	0	0	0	60	10	0	30	0	0
2016-04-11	2016-04-12	2016-06-16	CB2	172	crevice	f	i	1	0	0	0	0	0	50	50	0	0	0	0
2016-04-11	2016-04-12	2016-06-16	CB2	172	crevice	g	a	1	1	10	0	0	0	40	40	0	20	0	0
2016-04-11	2016-04-12	2016-06-16	CB2	172	crevice	g	b	1	1	27	0	0	0	60	10	0	30	0	0
2016-04-11	2016-04-12	2016-06-16	CB2	172	exposed	g	c	1	0	0	0	0	0	70	0	0	30	0	0
2016-04-11	2016-04-12	2016-06-16	CB2	172	crevice	g	d	1	0	0	0	0	0	0	100	0	0	0	0
2016-04-11	2016-04-12	2016-06-16	CB2	172	exposed	g	e	1	1	2	0	0	10	70	0	0	20	0	0
2016-04-11	2016-04-12	2016-06-16	CB2	172	crevice	g	f	1	0	1	0	0	15	5	60	0	20	0	0
2016-04-11	2016-04-12	2016-06-16	CB2	172	exposed	g	g	1	1	6	0	0	20	60	5	0	15	0	0
2016-04-11	2016-04-12	2016-06-16	CB2	172	crevice	g	h	1	0	1	0	0	0	20	60	0	20	0	0
2016-04-11	2016-04-12	2016-06-16	CB2	172	crevice	g	h	2	1	2	1	1	0	20	60	0	20	0	0
2016-04-11	2016-04-12	2016-06-16	CB2	172	crevice	g	h	3	0	1	0	0	0	20	60	0	20	0	0
2016-04-11	2016-04-12	2016-06-16	CB2	172	crevice	g	i	1	0	0	0	0	0	80	10	0	10	0	0
2016-04-11	2016-04-12	2016-06-16	CB2	172	crevice	h	a	1	1	25	0	0	0	70	10	0	20	0	0
2016-04-11	2016-04-12	2016-06-16	CB2	172	exposed	h	b	1	0	0	0	0	0	80	0	0	20	0	0
2016-04-11	2016-04-12	2016-06-16	CB2	172	crevice	h	c	1	1	18	0	0	0	30	60	0	10	0	0
2016-04-11	2016-04-12	2016-06-16	CB2	172	crevice	h	c	2	0	1	0	0	0	30	60	0	10	0	0
2016-04-11	2016-04-12	2016-06-16	CB2	172	crevice	h	c	3	0	1	0	0	0	30	60	0	10	0	0
2016-04-11	2016-04-12	2016-06-16	CB2	172	crevice	h	c	4	0	1	0	0	0	30	60	0	10	0	0
2016-04-11	2016-04-12	2016-06-16	CB2	172	crevice	h	c	5	1	3	3	1	0	30	60	0	10	0	0
2016-04-11	2016-04-12	2016-06-16	CB2	172	crevice	h	c	6	0	1	0	0	0	30	60	0	10	0	0
2016-04-11	2016-04-12	2016-06-16	CB2	172	crevice	h	c	7	0	1	0	0	0	30	60	0	10	0	0
2016-04-11	2016-04-12	2016-06-16	CB2	172	crevice	h	c	8	0	1	0	0	0	30	60	0	10	0	0
2016-04-11	2016-04-12	2016-06-16	CB2	172	crevice	h	c	9	1	27	7	1	0	30	60	0	10	0	0
2016-04-11	2016-04-12	2016-06-16	CB2	172	exposed	h	d	1	0	1	0	0	0	80	10	0	10	0	0
2016-04-11	2016-04-12	2016-06-16	CB2	172	exposed	h	d	2	0	1	0	0	0	80	10	0	10	0	0
2016-04-11	2016-04-12	2016-06-16	CB2	172	exposed	h	d	3	1	2	0	0	0	80	10	0	10	0	0
2016-04-11	2016-04-12	2016-06-16	CB2	172	crevice	h	e	1	1	42	0	0	0	40	50	0	10	0	0
2016-04-11	2016-04-12	2016-06-16	CB2	172	exposed	h	f	1	0	1	0	0	0	80	10	0	10	0	0
2016-04-11	2016-04-12	2016-06-16	CB2	172	exposed	h	f	2	1	16	0	0	0	80	10	0	10	0	0
2016-04-11	2016-04-12	2016-06-16	CB2	172	crevice	h	g	1	1	32	0	0	0	60	20	0	20	0	0
2016-04-11	2016-04-12	2016-06-16	CB2	172	exposed	h	h	1	0	0	0	0	0	60	10	0	30	0	0
2016-04-11	2016-04-12	2016-06-16	CB2	172	crevice	h	i	1	0	1	4	1	0	60	30	0	10	0	0
2016-04-11	2016-04-12	2016-06-16	CB2	172	crevice	h	i	2	0	1	0	0	0	60	30	0	10	0	0
2016-04-11	2016-04-12	2016-06-16	CB2	172	crevice	h	i	3	0	1	2	1	0	60	30	0	10	0	0
2016-04-11	2016-04-12	2016-06-16	CB2	172	crevice	i	a	1	0	0	0	0	0	50	0	0	50	0	0
2016-04-11	2016-04-12	2016-06-16	CB2	172	crevice	i	b	1	1	11	0	0	0	60	30	0	10	0	0
2016-04-11	2016-04-12	2016-06-16	CB2	172	crevice	i	c	1	0	0	0	0	0	80	10	0	10	0	0
2016-04-11	2016-04-12	2016-06-16	CB2	172	crevice	i	d	1	0	0	0	0	0	50	50	0	0	0	0
2016-04-11	2016-04-12	2016-06-16	CB2	172	crevice	i	e	1	0	0	0	0	0	90	0	0	10	0	0
2016-04-11	2016-04-12	2016-06-16	CB2	172	crevice	i	f	1	0	0	0	0	0	50	50	0	0	0	0
2016-04-11	2016-04-12	2016-06-16	CB2	172	crevice	i	g	1	0	0	0	0	0	50	20	0	30	0	0
2016-04-11	2016-04-12	2016-06-16	CB2	172	crevice	i	h	1	0	0	0	0	0	20	80	0	0	0	0
2016-04-11	2016-04-12	2016-06-16	CB2	172	crevice	i	i	1	0	0	0	0	0	50	0	0	50	0	0
2016-04-11	2016-04-12	2016-06-16	CB2	173	crevice	a	a	1	0	0	0	0	0	80	20	0	0	0	0
2016-04-11	2016-04-12	2016-06-16	CB2	173	crevice	a	b	1	1	13	0	0	0	50	50	0	0	0	0
2016-04-11	2016-04-12	2016-06-16	CB2	173	crevice	a	c	1	0	1	0	0	0	20	50	30	0	0	0
2016-04-11	2016-04-12	2016-06-16	CB2	173	crevice	a	d	1	1	10	0	0	0	10	80	10	0	0	0
2016-04-11	2016-04-12	2016-06-16	CB2	173	crevice	a	d	2	1	11	0	0	0	10	80	10	0	0	0
2016-04-11	2016-04-12	2016-06-16	CB2	173	crevice	a	e	1	1	6	0	0	0	40	30	20	10	0	0
2016-04-11	2016-04-12	2016-06-16	CB2	173	crevice	a	e	2	0	1	0	0	0	40	30	20	10	0	0
2016-04-11	2016-04-12	2016-06-16	CB2	173	crevice	a	f	1	1	15	0	0	0	40	50	10	0	0	0
2016-04-11	2016-04-12	2016-06-16	CB2	173	crevice	a	g	1	0	1	0	0	0	10	70	10	10	0	0
2016-04-11	2016-04-12	2016-06-16	CB2	173	crevice	a	g	2	0	1	0	0	0	10	70	10	10	0	0
2016-04-11	2016-04-12	2016-06-16	CB2	173	crevice	a	g	3	0	1	0	0	0	10	70	10	10	0	0
2016-04-11	2016-04-12	2016-06-16	CB2	173	crevice	a	g	4	0	1	0	0	0	10	70	10	10	0	0
2016-04-11	2016-04-12	2016-06-16	CB2	173	crevice	a	g	5	0	1	0	0	0	10	70	10	10	0	0
2016-04-11	2016-04-12	2016-06-16	CB2	173	crevice	a	h	1	1	32	0	0	0	70	20	0	10	0	0
2016-04-11	2016-04-12	2016-06-16	CB2	173	crevice	a	i	1	0	0	0	0	0	0	100	0	0	0	0
2016-04-11	2016-04-12	2016-06-16	CB2	173	crevice	b	a	1	1	4	0	0	0	10	90	0	0	0	0
2016-04-11	2016-04-12	2016-06-16	CB2	173	exposed	b	b	1	0	1	0	0	0	50	40	0	10	0	0
2016-04-11	2016-04-12	2016-06-16	CB2	173	exposed	b	b	2	1	6	0	0	0	50	40	0	10	0	0
2016-04-11	2016-04-12	2016-06-16	CB2	173	crevice	b	c	1	1	4	0	0	0	30	50	10	10	0	0
2016-04-11	2016-04-12	2016-06-16	CB2	173	crevice	b	c	2	0	1	0	0	0	30	50	10	10	0	0
2016-04-11	2016-04-12	2016-06-16	CB2	173	crevice	b	c	3	1	2	0	0	0	30	50	10	10	0	0
2016-04-11	2016-04-12	2016-06-16	CB2	173	crevice	b	c	4	1	36	0	0	0	30	50	10	10	0	0
2016-04-11	2016-04-12	2016-06-16	CB2	173	exposed	b	d	1	0	0	0	0	10	30	45	15	0	0	0
2016-04-11	2016-04-12	2016-06-16	CB2	173	crevice	b	e	1	0	1	0	0	0	15	40	5	0	40	0
2016-04-11	2016-04-12	2016-06-16	CB2	173	crevice	b	e	2	0	1	0	0	0	15	40	5	0	40	0
2016-04-11	2016-04-12	2016-06-16	CB2	173	crevice	b	e	3	0	1	0	0	0	15	40	5	0	40	0
2016-04-11	2016-04-12	2016-06-16	CB2	173	crevice	b	e	4	1	12	0	0	0	15	40	5	0	40	0
2016-04-11	2016-04-12	2016-06-16	CB2	173	exposed	b	f	1	0	1	0	0	20	55	15	5	5	0	0
2016-04-11	2016-04-12	2016-06-16	CB2	173	crevice	b	g	1	0	1	0	0	0	35	60	0	5	0	0
2016-04-11	2016-04-12	2016-06-16	CB2	173	crevice	b	g	2	1	2	0	0	0	35	60	0	5	0	0
2016-04-11	2016-04-12	2016-06-16	CB2	173	crevice	b	g	3	0	1	0	0	0	35	60	0	5	0	0
2016-04-11	2016-04-12	2016-06-16	CB2	173	crevice	b	g	4	0	1	0	0	0	35	60	0	5	0	0
2016-04-11	2016-04-12	2016-06-16	CB2	173	crevice	b	g	5	0	1	0	0	0	35	60	0	5	0	0
2016-04-11	2016-04-12	2016-06-16	CB2	173	crevice	b	g	6	0	1	0	0	0	35	60	0	5	0	0
2016-04-11	2016-04-12	2016-06-16	CB2	173	crevice	b	g	7	1	2	2	1	0	35	60	0	5	0	0
2016-04-11	2016-04-12	2016-06-16	CB2	173	crevice	b	g	8	1	13	0	0	0	35	60	0	5	0	0
2016-04-11	2016-04-12	2016-06-16	CB2	173	exposed	b	h	1	0	1	0	0	10	60	15	0	15	0	0
2016-04-11	2016-04-12	2016-06-16	CB2	173	crevice	b	i	1	0	1	0	0	0	0	100	0	0	0	0
2016-04-11	2016-04-12	2016-06-16	CB2	173	crevice	c	a	1	0	0	0	0	0	0	90	5	5	0	0
2016-04-11	2016-04-12	2016-06-16	CB2	173	crevice	c	b	1	1	5	0	0	0	0	90	10	0	0	0
2016-04-11	2016-04-12	2016-06-16	CB2	173	crevice	c	b	2	1	2	0	0	0	0	90	10	0	0	0
2016-04-11	2016-04-12	2016-06-16	CB2	173	crevice	c	b	3	1	4	0	0	0	0	90	10	0	0	0
2016-04-11	2016-04-12	2016-06-16	CB2	173	crevice	c	b	4	0	1	0	0	0	0	90	10	0	0	0
2016-04-11	2016-04-12	2016-06-16	CB2	173	crevice	c	b	5	1	13	0	0	0	0	90	10	0	0	0
2016-04-11	2016-04-12	2016-06-16	CB2	173	crevice	c	b	6	0	1	0	0	0	0	90	10	0	0	0
2016-04-11	2016-04-12	2016-06-16	CB2	173	crevice	c	b	7	1	22	0	0	0	0	90	10	0	0	0
2016-04-11	2016-04-12	2016-06-16	CB2	173	exposed	c	c	1	0	0	0	0	10	70	5	0	15	0	0
2016-04-11	2016-04-12	2016-06-16	CB2	173	crevice	c	d	1	0	0	0	0	0	0	70	10	20	0	0
2016-04-11	2016-04-12	2016-06-16	CB2	173	exposed	c	e	1	0	0	0	0	0	65	10	10	15	0	0
2016-04-11	2016-04-12	2016-06-16	CB2	173	crevice	c	f	1	0	0	0	0	5	5	80	5	5	0	0
2016-04-11	2016-04-12	2016-06-16	CB2	173	exposed	c	g	1	0	0	0	0	10	40	40	5	5	0	0
2016-04-11	2016-04-12	2016-06-16	CB2	173	crevice	c	h	1	0	0	0	0	5	40	20	0	20	15	0
2016-04-11	2016-04-12	2016-06-16	CB2	173	crevice	c	i	1	0	0	0	0	0	40	40	0	20	0	0
2016-04-11	2016-04-12	2016-06-16	CB2	173	crevice	d	a	1	1	2	0	0	0	0	100	0	0	0	0
2016-04-11	2016-04-12	2016-06-16	CB2	173	exposed	d	b	1	0	1	0	0	0	85	5	0	0	10	0
2016-04-11	2016-04-12	2016-06-16	CB2	173	crevice	d	c	1	0	1	0	0	0	0	95	5	0	0	0
2016-04-11	2016-04-12	2016-06-16	CB2	173	exposed	d	d	1	0	0	0	0	5	80	0	10	0	5	0
2016-04-11	2016-04-12	2016-06-16	CB2	173	crevice	d	e	1	0	0	0	0	0	0	100	0	0	0	0
2016-04-11	2016-04-12	2016-06-16	CB2	173	exposed	d	f	1	0	0	0	0	0	40	30	3	25	2	0
2016-04-11	2016-04-12	2016-06-16	CB2	173	crevice	d	g	1	0	0	0	0	0	0	95	5	0	0	0
2016-04-11	2016-04-12	2016-06-16	CB2	173	exposed	d	h	1	0	0	0	0	0	40	40	10	10	0	0
2016-04-11	2016-04-12	2016-06-16	CB2	173	crevice	d	i	1	1	2	0	0	0	30	50	10	10	0	0
2016-04-11	2016-04-12	2016-06-16	CB2	173	crevice	d	i	2	0	1	0	0	0	30	50	10	10	0	0
2016-04-11	2016-04-12	2016-06-16	CB2	173	crevice	d	i	3	0	1	0	0	0	30	50	10	10	0	0
2016-04-11	2016-04-12	2016-06-16	CB2	173	crevice	e	a	1	0	0	0	0	0	10	15	5	20	50	0
2016-04-11	2016-04-12	2016-06-16	CB2	173	crevice	e	b	1	1	45	0	0	0	5	90	5	0	0	0
2016-04-11	2016-04-12	2016-06-16	CB2	173	exposed	e	c	1	1	2	0	0	0	10	35	5	0	50	0
2016-04-11	2016-04-12	2016-06-16	CB2	173	crevice	e	d	1	0	0	0	0	0	50	0	0	50	0	0
2016-04-11	2016-04-12	2016-06-16	CB2	173	crevice	e	f	1	0	0	0	0	0	50	30	0	20	0	0
2016-04-11	2016-04-12	2016-06-16	CB2	173	exposed	e	g	1	0	0	0	0	0	35	5	0	60	0	0
2016-04-11	2016-04-12	2016-06-16	CB2	173	crevice	e	h	1	0	0	0	0	0	10	50	10	25	5	0
2016-04-11	2016-04-12	2016-06-16	CB2	173	crevice	e	i	1	0	0	0	0	0	40	50	0	10	0	0
2016-04-11	2016-04-12	2016-06-16	CB2	173	crevice	f	a	1	1	20	0	0	0	0	100	0	0	0	0
2016-04-11	2016-04-12	2016-06-16	CB2	173	exposed	f	b	1	1	2	0	0	10	70	10	5	5	0	0
2016-04-11	2016-04-12	2016-06-16	CB2	173	exposed	f	b	2	1	2	0	0	10	70	10	5	5	0	0
2016-04-11	2016-04-12	2016-06-16	CB2	173	exposed	f	b	3	0	1	0	0	10	70	10	5	5	0	0
2016-04-11	2016-04-12	2016-06-16	CB2	173	crevice	f	c	1	1	14	0	0	5	5	75	10	5	0	0
2016-04-11	2016-04-12	2016-06-16	CB2	173	crevice	f	c	2	1	6	0	0	5	5	75	10	5	0	0
2016-04-11	2016-04-12	2016-06-16	CB2	173	crevice	f	c	3	1	3	3	1	5	5	75	10	5	0	0
2016-04-11	2016-04-12	2016-06-16	CB2	173	crevice	f	c	4	0	1	0	0	5	5	75	10	5	0	0
2016-04-11	2016-04-12	2016-06-16	CB2	173	crevice	f	c	5	1	2	0	0	5	5	75	10	5	0	0
2016-04-11	2016-04-12	2016-06-16	CB2	173	exposed	f	d	1	0	0	0	0	0	70	10	0	20	0	0
2016-04-11	2016-04-12	2016-06-16	CB2	173	crevice	f	e	1	0	0	0	0	0	50	10	0	40	0	0
2016-04-11	2016-04-12	2016-06-16	CB2	173	exposed	f	f	1	0	0	0	0	0	50	5	0	45	0	0
2016-04-11	2016-04-12	2016-06-16	CB2	173	crevice	f	g	1	0	0	0	0	0	30	50	0	20	0	0
2016-04-11	2016-04-12	2016-06-16	CB2	173	exposed	f	h	1	0	0	0	0	0	70	10	0	20	0	0
2016-04-11	2016-04-12	2016-06-16	CB2	173	crevice	f	i	1	1	6	0	0	0	15	70	0	15	0	0
2016-04-11	2016-04-12	2016-06-16	CB2	173	crevice	g	a	1	0	1	0	0	0	40	30	0	30	0	0
2016-04-11	2016-04-12	2016-06-16	CB2	173	crevice	g	b	1	1	14	0	0	0	10	50	10	25	5	0
2016-04-11	2016-04-12	2016-06-16	CB2	173	crevice	g	b	2	1	3	0	0	0	10	50	10	25	5	0
2016-04-11	2016-04-12	2016-06-16	CB2	173	crevice	g	b	3	1	14	0	0	0	10	50	10	25	5	0
2016-04-11	2016-04-12	2016-06-16	CB2	173	crevice	g	b	4	1	22	0	0	0	10	50	10	25	5	0
2016-04-11	2016-04-12	2016-06-16	CB2	173	exposed	g	c	1	0	1	0	0	10	40	38	10	2	0	0
2016-04-11	2016-04-12	2016-06-16	CB2	173	exposed	g	c	2	0	1	0	0	10	40	38	10	2	0	0
2016-04-11	2016-04-12	2016-06-16	CB2	173	crevice	g	d	1	0	0	0	0	0	20	60	5	15	0	0
2016-04-11	2016-04-12	2016-06-16	CB2	173	exposed	g	e	1	0	0	0	0	0	50	27	3	20	0	0
2016-04-11	2016-04-12	2016-06-16	CB2	173	crevice	g	f	1	0	0	0	0	50	20	10	0	10	10	0
2016-04-11	2016-04-12	2016-06-16	CB2	173	exposed	g	g	1	0	0	0	0	0	50	25	10	10	5	0
2016-04-11	2016-04-12	2016-06-16	CB2	173	crevice	g	h	1	1	11	0	0	20	40	20	1	19	0	0
2016-04-11	2016-04-12	2016-06-16	CB2	173	crevice	g	i	1	0	0	0	0	0	40	25	10	25	0	0
2016-04-11	2016-04-12	2016-06-16	CB2	173	crevice	h	a	1	0	0	0	0	0	0	100	0	0	0	0
2016-04-11	2016-04-12	2016-06-16	CB2	173	exposed	h	b	1	0	1	0	0	0	60	25	0	0	15	0
2016-04-11	2016-04-12	2016-06-16	CB2	173	exposed	h	b	2	1	9	0	0	0	60	25	0	0	15	0
2016-04-11	2016-04-12	2016-06-16	CB2	173	exposed	h	b	3	1	4	0	0	0	60	25	0	0	15	0
2016-04-11	2016-04-12	2016-06-16	CB2	173	crevice	h	c	1	1	163	0	0	0	5	90	5	0	0	0
2016-04-11	2016-04-12	2016-06-16	CB2	173	exposed	h	d	1	1	4	0	0	0	60	30	5	5	0	0
2016-04-11	2016-04-12	2016-06-16	CB2	173	exposed	h	d	2	1	3	0	0	0	60	30	5	5	0	0
2016-04-11	2016-04-12	2016-06-16	CB2	173	exposed	h	d	3	0	1	0	0	0	60	30	5	5	0	0
2016-04-11	2016-04-12	2016-06-16	CB2	173	exposed	h	d	4	0	1	0	0	0	60	30	5	5	0	0
2016-04-11	2016-04-12	2016-06-16	CB2	173	crevice	h	e	1	1	125	0	0	0	10	57	3	0	30	0
2016-04-11	2016-04-12	2016-06-16	CB2	173	exposed	h	f	1	0	1	0	0	0	60	15	5	20	0	0
2016-04-11	2016-04-12	2016-06-16	CB2	173	exposed	h	f	2	1	31	0	0	0	60	15	5	20	0	0
2016-04-11	2016-04-12	2016-06-16	CB2	173	crevice	h	g	1	1	118	0	0	10	50	20	5	15	0	0
2016-04-11	2016-04-12	2016-06-16	CB2	173	exposed	h	h	1	1	26	0	0	0	70	5	0	25	0	0
2016-04-11	2016-04-12	2016-06-16	CB2	173	exposed	h	h	2	0	1	0	0	0	70	5	0	25	0	0
2016-04-11	2016-04-12	2016-06-16	CB2	173	exposed	h	h	3	0	1	0	0	0	70	5	0	25	0	0
2016-04-11	2016-04-12	2016-06-16	CB2	173	exposed	h	h	4	1	14	0	0	0	70	5	0	25	0	0
2016-04-11	2016-04-12	2016-06-16	CB2	173	exposed	h	h	5	0	1	0	0	0	70	5	0	25	0	0
2016-04-11	2016-04-12	2016-06-16	CB2	173	exposed	h	h	6	0	1	0	0	0	70	5	0	25	0	0
2016-04-11	2016-04-12	2016-06-16	CB2	173	crevice	h	i	1	1	44	0	0	0	30	30	0	40	0	0
2016-04-11	2016-04-12	2016-06-16	CB2	173	crevice	i	a	1	0	0	0	0	0	100	0	0	0	0	0
2016-04-11	2016-04-12	2016-06-16	CB2	173	crevice	i	b	1	0	0	0	0	0	50	50	0	0	0	0
2016-04-11	2016-04-12	2016-06-16	CB2	173	crevice	i	c	1	0	0	0	0	30	30	10	10	20	0	0
2016-04-11	2016-04-12	2016-06-16	CB2	173	crevice	i	d	1	0	0	0	0	0	50	50	0	0	0	0
2016-04-11	2016-04-12	2016-06-16	CB2	173	crevice	i	e	1	0	0	0	0	0	90	0	0	10	0	0
2016-04-11	2016-04-12	2016-06-16	CB2	173	crevice	i	f	1	0	0	0	0	0	50	30	0	20	0	0
2016-04-11	2016-04-12	2016-06-16	CB2	173	crevice	i	g	1	0	0	0	0	0	40	20	0	40	0	0
2016-04-11	2016-04-12	2016-06-16	CB2	173	crevice	i	h	1	0	0	0	0	0	50	40	0	10	0	0
2016-04-11	2016-04-12	2016-06-16	CB2	173	crevice	i	i	1	0	0	0	0	0	0	0	0	100	0	0
2016-04-11	2016-04-12	2016-06-16	CB2	174	crevice	a	a	1	0	1	0	0	0	0	100	0	0	0	0
2016-04-11	2016-04-12	2016-06-16	CB2	174	crevice	a	b	1	0	0	0	0	0	20	70	10	0	0	0
2016-04-11	2016-04-12	2016-06-16	CB2	174	crevice	a	c	1	0	1	0	0	0	20	70	10	0	0	0
2016-04-11	2016-04-12	2016-06-16	CB2	174	crevice	a	d	1	1	2	0	0	0	5	80	15	0	0	0
2016-04-11	2016-04-12	2016-06-16	CB2	174	crevice	a	d	2	1	7	0	0	0	5	80	15	0	0	0
2016-04-11	2016-04-12	2016-06-16	CB2	174	crevice	a	e	1	0	1	0	0	0	5	80	15	0	0	0
2016-04-11	2016-04-12	2016-06-16	CB2	174	crevice	a	e	2	0	1	0	0	0	5	80	15	0	0	0
2016-04-11	2016-04-12	2016-06-16	CB2	174	crevice	a	e	3	0	1	0	0	0	5	80	15	0	0	0
2016-04-11	2016-04-12	2016-06-16	CB2	174	crevice	a	e	4	0	1	0	0	0	5	80	15	0	0	0
2016-04-11	2016-04-12	2016-06-16	CB2	174	crevice	a	e	5	0	1	0	0	0	5	80	15	0	0	0
2016-04-11	2016-04-12	2016-06-16	CB2	174	crevice	a	f	1	0	0	0	0	0	5	90	5	0	0	0
2016-04-11	2016-04-12	2016-06-16	CB2	174	crevice	a	g	1	0	1	0	0	0	5	80	5	10	0	0
2016-04-11	2016-04-12	2016-06-16	CB2	174	crevice	a	g	2	1	2	0	0	0	5	80	5	10	0	0
2016-04-11	2016-04-12	2016-06-16	CB2	174	crevice	a	h	1	0	0	0	0	0	10	90	0	0	0	0
2016-04-11	2016-04-12	2016-06-16	CB2	174	crevice	a	i	1	0	0	0	0	0	0	100	0	0	0	0
2016-04-11	2016-04-12	2016-06-16	CB2	174	crevice	b	a	1	0	0	0	0	0	0	100	0	0	0	0
2016-04-11	2016-04-12	2016-06-16	CB2	174	exposed	b	b	1	0	0	0	0	10	30	30	20	10	0	0
2016-04-11	2016-04-12	2016-06-16	CB2	174	crevice	b	c	1	0	0	0	0	0	0	60	40	0	0	0
2016-04-11	2016-04-12	2016-06-16	CB2	174	exposed	b	d	1	0	0	0	0	5	15	60	15	5	0	0
2016-04-11	2016-04-12	2016-06-16	CB2	174	crevice	b	e	1	0	0	0	0	0	0	80	20	0	0	0
2016-04-11	2016-04-12	2016-06-16	CB2	174	exposed	b	f	1	0	0	0	0	50	15	30	5	0	0	0
2016-04-11	2016-04-12	2016-06-16	CB2	174	crevice	b	g	1	1	3	0	0	0	0	70	20	10	0	0
2016-04-11	2016-04-12	2016-06-16	CB2	174	crevice	b	g	10	0	1	0	0	0	0	70	20	10	0	0
2016-04-11	2016-04-12	2016-06-16	CB2	174	crevice	b	g	11	0	1	0	0	0	0	70	20	10	0	0
2016-04-11	2016-04-12	2016-06-16	CB2	174	crevice	b	g	12	0	1	0	0	0	0	70	20	10	0	0
2016-04-11	2016-04-12	2016-06-16	CB2	174	crevice	b	g	13	1	7	0	0	0	0	70	20	10	0	0
2016-04-11	2016-04-12	2016-06-16	CB2	174	crevice	b	g	2	0	1	0	0	0	0	70	20	10	0	0
2016-04-11	2016-04-12	2016-06-16	CB2	174	crevice	b	g	3	0	1	0	0	0	0	70	20	10	0	0
2016-04-11	2016-04-12	2016-06-16	CB2	174	crevice	b	g	4	1	2	0	0	0	0	70	20	10	0	0
2016-04-11	2016-04-12	2016-06-16	CB2	174	crevice	b	g	5	0	1	0	0	0	0	70	20	10	0	0
2016-04-11	2016-04-12	2016-06-16	CB2	174	crevice	b	g	6	0	1	0	0	0	0	70	20	10	0	0
2016-04-11	2016-04-12	2016-06-16	CB2	174	crevice	b	g	7	1	6	0	0	0	0	70	20	10	0	0
2016-04-11	2016-04-12	2016-06-16	CB2	174	crevice	b	g	8	1	2	0	0	0	0	70	20	10	0	0
2016-04-11	2016-04-12	2016-06-16	CB2	174	crevice	b	g	9	0	1	0	0	0	0	70	20	10	0	0
2016-04-11	2016-04-12	2016-06-16	CB2	174	exposed	b	h	1	1	5	0	0	10	50	30	10	0	0	0
2016-04-11	2016-04-12	2016-06-16	CB2	174	exposed	b	h	2	0	1	0	0	10	50	30	10	0	0	0
2016-04-11	2016-04-12	2016-06-16	CB2	174	crevice	b	i	1	0	0	0	0	0	10	90	0	0	0	0
2016-04-11	2016-04-12	2016-06-16	CB2	174	crevice	c	a	1	0	0	0	0	0	5	95	0	0	0	0
2016-04-11	2016-04-12	2016-06-16	CB2	174	crevice	c	b	1	0	0	0	0	0	10	90	0	0	0	0
2016-04-11	2016-04-12	2016-06-16	CB2	174	exposed	c	c	1	0	0	0	0	0	20	70	10	0	0	0
2016-04-11	2016-04-12	2016-06-16	CB2	174	crevice	c	d	1	0	0	0	0	5	5	80	10	0	0	0
2016-04-11	2016-04-12	2016-06-16	CB2	174	exposed	c	e	1	0	0	0	0	40	10	40	10	0	0	0
2016-04-11	2016-04-12	2016-06-16	CB2	174	crevice	c	f	1	0	0	0	0	0	25	55	5	5	10	0
2016-04-11	2016-04-12	2016-06-16	CB2	174	exposed	c	g	1	0	0	0	0	30	10	45	10	5	0	0
2016-04-11	2016-04-12	2016-06-16	CB2	174	crevice	c	h	1	0	1	0	0	10	20	50	5	10	5	0
2016-04-11	2016-04-12	2016-06-16	CB2	174	crevice	c	h	2	0	1	0	0	10	20	50	5	10	5	0
2016-04-11	2016-04-12	2016-06-16	CB2	174	crevice	c	h	3	0	1	0	0	10	20	50	5	10	5	0
2016-04-11	2016-04-12	2016-06-16	CB2	174	crevice	c	h	4	1	17	0	0	10	20	50	5	10	5	0
2016-04-11	2016-04-12	2016-06-16	CB2	174	crevice	c	i	1	0	0	0	0	10	10	80	0	0	0	0
2016-04-11	2016-04-12	2016-06-16	CB2	174	crevice	d	a	1	0	0	0	0	0	0	100	0	0	0	0
2016-04-11	2016-04-12	2016-06-16	CB2	174	exposed	d	b	1	0	0	0	0	10	10	60	20	0	0	0
2016-04-11	2016-04-12	2016-06-16	CB2	174	crevice	d	c	1	0	0	0	0	0	10	60	30	0	0	0
2016-04-11	2016-04-12	2016-06-16	CB2	174	exposed	d	d	1	0	0	0	0	10	10	50	30	0	0	0
2016-04-11	2016-04-12	2016-06-16	CB2	174	crevice	d	e	1	0	0	0	0	0	0	100	0	0	0	0
2016-04-11	2016-04-12	2016-06-16	CB2	174	exposed	d	f	1	0	0	0	0	5	5	60	30	0	0	0
2016-04-11	2016-04-12	2016-06-16	CB2	174	crevice	d	g	1	0	1	0	0	0	0	100	0	0	0	0
2016-04-11	2016-04-12	2016-06-16	CB2	174	crevice	d	g	2	1	15	0	0	0	0	100	0	0	0	0
2016-04-11	2016-04-12	2016-06-16	CB2	174	exposed	d	h	1	1	4	4	1	0	50	45	5	0	0	0
2016-04-11	2016-04-12	2016-06-16	CB2	174	crevice	d	i	1	1	4	0	0	0	0	100	0	0	0	0
2016-04-11	2016-04-12	2016-06-16	CB2	174	crevice	e	a	1	0	0	0	0	0	5	90	5	0	0	0
2016-04-11	2016-04-12	2016-06-16	CB2	174	crevice	e	b	1	0	0	0	0	0	5	90	5	0	0	0
2016-04-11	2016-04-12	2016-06-16	CB2	174	exposed	e	c	1	0	0	0	0	0	5	90	5	0	0	0
2016-04-11	2016-04-12	2016-06-16	CB2	174	crevice	e	d	1	0	0	0	0	5	40	20	10	25	0	0
2016-04-11	2016-04-12	2016-06-16	CB2	174	crevice	e	f	1	0	0	0	0	0	0	100	0	0	0	0
2016-04-11	2016-04-12	2016-06-16	CB2	174	exposed	e	g	1	0	1	0	0	5	5	80	10	0	0	0
2016-04-11	2016-04-12	2016-06-16	CB2	174	exposed	e	g	2	0	1	0	0	5	5	80	10	0	0	0
2016-04-11	2016-04-12	2016-06-16	CB2	174	crevice	e	h	1	1	4	0	0	5	5	70	10	10	0	0
2016-04-11	2016-04-12	2016-06-16	CB2	174	crevice	e	h	2	1	24	0	0	5	5	70	10	10	0	0
2016-04-11	2016-04-12	2016-06-16	CB2	174	crevice	e	i	1	0	0	0	0	30	0	60	0	10	0	0
2016-04-11	2016-04-12	2016-06-16	CB2	174	crevice	f	a	1	0	0	0	0	0	0	100	0	0	0	0
2016-04-11	2016-04-12	2016-06-16	CB2	174	exposed	f	b	1	0	0	0	0	10	10	60	20	0	0	0
2016-04-11	2016-04-12	2016-06-16	CB2	174	crevice	f	c	1	0	0	0	0	0	0	10	60	30	0	0
2016-04-11	2016-04-12	2016-06-16	CB2	174	exposed	f	d	1	0	0	0	0	5	0	80	15	0	0	0
2016-04-11	2016-04-12	2016-06-16	CB2	174	crevice	f	e	1	0	0	0	0	5	10	20	10	50	5	0
2016-04-11	2016-04-12	2016-06-16	CB2	174	exposed	f	f	1	0	0	0	0	0	0	90	10	0	0	0
2016-04-11	2016-04-12	2016-06-16	CB2	174	crevice	f	g	1	0	0	0	0	5	5	30	20	40	0	0
2016-04-11	2016-04-12	2016-06-16	CB2	174	exposed	f	h	1	0	0	0	0	10	20	70	0	0	0	0
2016-04-11	2016-04-12	2016-06-16	CB2	174	crevice	f	i	1	0	0	0	0	0	0	100	0	0	0	0
2016-04-11	2016-04-12	2016-06-16	CB2	174	crevice	g	a	1	0	0	0	0	0	0	100	0	0	0	0
2016-04-11	2016-04-12	2016-06-16	CB2	174	crevice	g	b	1	0	0	0	0	0	10	80	10	0	0	0
2016-04-11	2016-04-12	2016-06-16	CB2	174	exposed	g	c	1	0	0	0	0	5	10	80	5	0	0	0
2016-04-11	2016-04-12	2016-06-16	CB2	174	crevice	g	d	1	0	0	0	0	0	0	90	5	5	0	0
2016-04-11	2016-04-12	2016-06-16	CB2	174	exposed	g	e	1	0	0	0	0	0	2	83	15	0	0	0
2016-04-11	2016-04-12	2016-06-16	CB2	174	crevice	g	f	1	0	0	0	0	0	0	90	10	0	0	0
2016-04-11	2016-04-12	2016-06-16	CB2	174	exposed	g	g	1	0	1	0	0	0	5	65	25	5	0	0
2016-04-11	2016-04-12	2016-06-16	CB2	174	exposed	g	g	2	0	1	0	0	0	5	65	25	5	0	0
2016-04-11	2016-04-12	2016-06-16	CB2	174	exposed	g	g	3	0	1	0	0	0	5	65	25	5	0	0
2016-04-11	2016-04-12	2016-06-16	CB2	174	exposed	g	g	4	0	1	0	0	0	5	65	25	5	0	0
2016-04-11	2016-04-12	2016-06-16	CB2	174	exposed	g	g	5	1	11	0	0	0	5	65	25	5	0	0
2016-04-11	2016-04-12	2016-06-16	CB2	174	crevice	g	h	1	1	28	0	0	0	0	90	5	5	0	0
2016-04-11	2016-04-12	2016-06-16	CB2	174	crevice	g	h	2	1	8	0	0	0	0	90	5	5	0	0
2016-04-11	2016-04-12	2016-06-16	CB2	174	crevice	g	i	1	0	0	0	0	0	0	100	0	0	0	0
2016-04-11	2016-04-12	2016-06-16	CB2	174	crevice	h	a	1	0	0	0	0	0	0	100	0	0	0	0
2016-04-11	2016-04-12	2016-06-16	CB2	174	exposed	h	b	1	0	0	0	0	5	50	40	0	5	0	0
2016-04-11	2016-04-12	2016-06-16	CB2	174	crevice	h	c	1	1	7	0	0	5	40	40	0	15	0	0
2016-04-11	2016-04-12	2016-06-16	CB2	174	crevice	h	c	2	0	1	0	0	5	40	40	0	15	0	0
2016-04-11	2016-04-12	2016-06-16	CB2	174	crevice	h	c	3	1	52	0	0	5	40	40	0	15	0	0
2016-04-11	2016-04-12	2016-06-16	CB2	174	exposed	h	d	1	0	1	0	0	5	35	35	20	5	0	0
2016-04-11	2016-04-12	2016-06-16	CB2	174	crevice	h	e	1	1	27	0	0	0	20	50	5	25	0	0
2016-04-11	2016-04-12	2016-06-16	CB2	174	exposed	h	f	1	0	1	0	0	10	25	60	5	0	0	0
2016-04-11	2016-04-12	2016-06-16	CB2	174	exposed	h	f	2	1	6	0	0	10	25	60	5	0	0	0
2016-04-11	2016-04-12	2016-06-16	CB2	174	exposed	h	f	3	1	11	0	0	10	25	60	5	0	0	0
2016-04-11	2016-04-12	2016-06-16	CB2	174	crevice	h	g	1	1	105	0	0	0	15	80	0	5	0	0
2016-04-11	2016-04-12	2016-06-16	CB2	174	exposed	h	h	1	0	1	0	0	0	20	75	0	5	0	0
2016-04-11	2016-04-12	2016-06-16	CB2	174	exposed	h	h	2	1	38	0	0	0	20	75	0	5	0	0
2016-04-11	2016-04-12	2016-06-16	CB2	174	exposed	h	h	3	1	7	0	0	0	20	75	0	5	0	0
2016-04-11	2016-04-12	2016-06-16	CB2	174	exposed	h	h	4	1	4	0	0	0	20	75	0	5	0	0
2016-04-11	2016-04-12	2016-06-16	CB2	174	crevice	h	i	1	0	0	0	0	0	0	100	0	0	0	0
2016-04-11	2016-04-12	2016-06-16	CB2	174	crevice	i	a	1	0	0	0	0	0	0	100	0	0	0	0
2016-04-11	2016-04-12	2016-06-16	CB2	174	crevice	i	b	1	0	0	0	0	0	0	100	0	0	0	0
2016-04-11	2016-04-12	2016-06-16	CB2	174	crevice	i	c	1	1	3	0	0	0	0	100	0	0	0	0
2016-04-11	2016-04-12	2016-06-16	CB2	174	crevice	i	d	1	0	0	0	0	0	0	100	0	0	0	0
2016-04-11	2016-04-12	2016-06-16	CB2	174	crevice	i	e	1	0	0	0	0	0	0	100	0	0	0	0
2016-04-11	2016-04-12	2016-06-16	CB2	174	crevice	i	f	1	0	0	0	0	0	0	100	0	0	0	0
2016-04-11	2016-04-12	2016-06-16	CB2	174	crevice	i	g	1	0	0	0	0	0	0	100	0	0	0	0
2016-04-11	2016-04-12	2016-06-16	CB2	174	crevice	i	h	1	0	0	0	0	0	0	100	0	0	0	0
2016-04-11	2016-04-12	2016-06-16	CB2	174	crevice	i	i	1	0	0	0	0	0	0	100	0	0	0	0
2016-04-11	2016-04-12	2016-06-16	CB2	175	crevice	a	a	1	0	0	0	0	0	50	50	0	0	0	0
2016-04-11	2016-04-12	2016-06-16	CB2	175	crevice	a	b	1	0	0	0	0	0	20	80	0	0	0	0
2016-04-11	2016-04-12	2016-06-16	CB2	175	crevice	a	c	1	0	0	0	0	0	60	20	0	20	0	0
2016-04-11	2016-04-12	2016-06-16	CB2	175	crevice	a	d	1	0	1	0	0	0	20	80	0	0	0	0
2016-04-11	2016-04-12	2016-06-16	CB2	175	crevice	a	e	1	0	0	0	0	0	70	10	0	20	0	0
2016-04-11	2016-04-12	2016-06-16	CB2	175	crevice	a	f	1	0	0	0	0	0	40	50	0	10	0	0
2016-04-11	2016-04-12	2016-06-16	CB2	175	crevice	a	g	1	0	0	0	0	0	5	90	0	5	0	0
2016-04-11	2016-04-12	2016-06-16	CB2	175	crevice	a	h	1	0	0	0	0	0	10	90	0	0	0	0
2016-04-11	2016-04-12	2016-06-16	CB2	175	crevice	a	i	1	0	0	0	0	0	0	100	0	0	0	0
2016-04-11	2016-04-12	2016-06-16	CB2	175	crevice	b	a	1	0	1	0	0	0	0	100	0	0	0	0
2016-04-11	2016-04-12	2016-06-16	CB2	175	exposed	b	b	1	0	1	0	0	5	60	10	5	20	0	0
2016-04-11	2016-04-12	2016-06-16	CB2	175	crevice	b	c	1	1	3	0	0	0	60	20	5	15	0	0
2016-04-11	2016-04-12	2016-06-16	CB2	175	crevice	b	c	2	1	9	0	0	0	60	20	5	15	0	0
2016-04-11	2016-04-12	2016-06-16	CB2	175	crevice	b	c	3	1	7	0	0	0	60	20	5	15	0	0
2016-04-11	2016-04-12	2016-06-16	CB2	175	crevice	b	c	4	1	8	0	0	0	60	20	5	15	0	0
2016-04-11	2016-04-12	2016-06-16	CB2	175	crevice	b	c	5	1	3	0	0	0	60	20	5	15	0	0
2016-04-11	2016-04-12	2016-06-16	CB2	175	crevice	b	c	6	0	1	0	0	0	60	20	5	15	0	0
2016-04-11	2016-04-12	2016-06-16	CB2	175	crevice	b	c	7	0	1	0	0	0	60	20	5	15	0	0
2016-04-11	2016-04-12	2016-06-16	CB2	175	crevice	b	c	8	0	1	0	0	0	60	20	5	15	0	0
2016-04-11	2016-04-12	2016-06-16	CB2	175	exposed	b	d	1	0	0	0	0	0	40	45	10	5	0	0
2016-04-11	2016-04-12	2016-06-16	CB2	175	crevice	b	e	1	1	3	0	0	0	5	75	15	5	0	0
2016-04-11	2016-04-12	2016-06-16	CB2	175	crevice	b	e	2	0	1	0	0	0	5	75	15	5	0	0
2016-04-11	2016-04-12	2016-06-16	CB2	175	crevice	b	e	3	0	1	0	0	0	5	75	15	5	0	0
2016-04-11	2016-04-12	2016-06-16	CB2	175	crevice	b	e	4	0	1	0	0	0	5	75	15	5	0	0
2016-04-11	2016-04-12	2016-06-16	CB2	175	crevice	b	e	5	0	1	0	0	0	5	75	15	5	0	0
2016-04-11	2016-04-12	2016-06-16	CB2	175	crevice	b	e	6	0	1	0	0	0	5	75	15	5	0	0
2016-04-11	2016-04-12	2016-06-16	CB2	175	exposed	b	f	1	0	0	0	0	5	50	40	2	3	0	0
2016-04-11	2016-04-12	2016-06-16	CB2	175	crevice	b	g	1	0	1	0	0	0	10	85	1	4	0	0
2016-04-11	2016-04-12	2016-06-16	CB2	175	exposed	b	h	1	0	1	0	0	5	40	40	5	10	0	0
2016-04-11	2016-04-12	2016-06-16	CB2	175	crevice	b	i	1	1	4	4	1	0	50	50	0	0	0	0
2016-04-11	2016-04-12	2016-06-16	CB2	175	crevice	c	a	1	0	0	0	0	0	50	50	0	0	0	0
2016-04-11	2016-04-12	2016-06-16	CB2	175	crevice	c	b	1	1	40	0	0	0	3	80	2	5	10	0
2016-04-11	2016-04-12	2016-06-16	CB2	175	crevice	c	b	2	0	1	0	0	0	3	80	2	5	10	0
2016-04-11	2016-04-12	2016-06-16	CB2	175	crevice	c	b	3	0	1	0	0	0	3	80	2	5	10	0
2016-04-11	2016-04-12	2016-06-16	CB2	175	crevice	c	b	4	0	1	0	0	0	3	80	2	5	10	0
2016-04-11	2016-04-12	2016-06-16	CB2	175	crevice	c	b	5	0	1	0	0	0	3	80	2	5	10	0
2016-04-11	2016-04-12	2016-06-16	CB2	175	crevice	c	b	6	1	9	0	0	0	3	80	2	5	10	0
2016-04-11	2016-04-12	2016-06-16	CB2	175	exposed	c	c	1	0	0	0	0	0	20	20	0	25	35	0
2016-04-11	2016-04-12	2016-06-16	CB2	175	crevice	c	d	1	0	1	0	0	0	5	80	15	0	0	0
2016-04-11	2016-04-12	2016-06-16	CB2	175	crevice	c	d	2	0	1	0	0	0	5	80	15	0	0	0
2016-04-11	2016-04-12	2016-06-16	CB2	175	exposed	c	e	1	0	0	0	0	0	40	40	10	10	0	0
2016-04-11	2016-04-12	2016-06-16	CB2	175	crevice	c	f	1	0	0	0	0	0	5	80	10	5	0	0
2016-04-11	2016-04-12	2016-06-16	CB2	175	exposed	c	g	1	0	0	0	0	0	10	50	20	20	0	0
2016-04-11	2016-04-12	2016-06-16	CB2	175	crevice	c	h	1	0	0	0	0	0	10	70	20	0	0	0
2016-04-11	2016-04-12	2016-06-16	CB2	175	crevice	c	i	1	0	0	0	0	0	5	80	5	10	0	0
2016-04-11	2016-04-12	2016-06-16	CB2	175	crevice	d	a	1	1	3	0	0	0	0	100	0	0	0	0
2016-04-11	2016-04-12	2016-06-16	CB2	175	crevice	d	a	2	1	6	0	0	0	0	100	0	0	0	0
2016-04-11	2016-04-12	2016-06-16	CB2	175	exposed	d	b	1	0	0	0	0	0	50	5	5	40	0	0
2016-04-11	2016-04-12	2016-06-16	CB2	175	crevice	d	c	1	1	15	0	0	5	45	15	0	35	0	0
2016-04-11	2016-04-12	2016-06-16	CB2	175	exposed	d	d	1	0	0	0	0	0	30	30	20	20	0	0
2016-04-11	2016-04-12	2016-06-16	CB2	175	crevice	d	e	1	0	1	0	0	0	10	80	1	9	0	0
2016-04-11	2016-04-12	2016-06-16	CB2	175	crevice	d	e	2	1	4	4	1	0	10	80	1	9	0	0
2016-04-11	2016-04-12	2016-06-16	CB2	175	crevice	d	e	3	0	1	0	0	0	10	80	1	9	0	0
2016-04-11	2016-04-12	2016-06-16	CB2	175	crevice	d	e	4	0	1	0	0	0	10	80	1	9	0	0
2016-04-11	2016-04-12	2016-06-16	CB2	175	exposed	d	f	1	0	0	0	0	10	30	25	25	10	0	0
2016-04-11	2016-04-12	2016-06-16	CB2	175	crevice	d	g	1	0	0	0	0	0	10	80	0	10	0	0
2016-04-11	2016-04-12	2016-06-16	CB2	175	exposed	d	h	1	0	0	0	0	0	40	20	5	35	0	0
2016-04-11	2016-04-12	2016-06-16	CB2	175	crevice	d	i	1	0	0	0	0	0	50	50	0	0	0	0
2016-04-11	2016-04-12	2016-06-16	CB2	175	crevice	e	a	1	0	0	0	0	0	60	20	0	20	0	0
2016-04-11	2016-04-12	2016-06-16	CB2	175	crevice	e	b	1	1	7	0	0	0	10	77	3	0	10	0
2016-04-11	2016-04-12	2016-06-16	CB2	175	crevice	e	b	2	1	3	0	0	0	10	77	3	0	10	0
2016-04-11	2016-04-12	2016-06-16	CB2	175	crevice	e	b	3	1	6	0	0	0	10	77	3	0	10	0
2016-04-11	2016-04-12	2016-06-16	CB2	175	crevice	e	b	4	1	9	0	0	0	10	77	3	0	10	0
2016-04-11	2016-04-12	2016-06-16	CB2	175	exposed	e	c	1	0	0	0	0	0	15	70	10	0	5	0
2016-04-11	2016-04-12	2016-06-16	CB2	175	crevice	e	d	1	0	1	0	0	0	20	80	0	0	0	0
2016-04-11	2016-04-12	2016-06-16	CB2	175	crevice	e	d	2	0	1	0	0	0	20	80	0	0	0	0
2016-04-11	2016-04-12	2016-06-16	CB2	175	crevice	e	f	1	0	0	0	0	0	10	90	0	0	0	0
2016-04-11	2016-04-12	2016-06-16	CB2	175	exposed	e	g	1	0	0	0	0	0	30	40	20	10	0	0
2016-04-11	2016-04-12	2016-06-16	CB2	175	crevice	e	h	1	0	0	0	0	0	5	90	0	5	0	0
2016-04-11	2016-04-12	2016-06-16	CB2	175	crevice	e	i	1	0	0	0	0	0	50	50	0	0	0	0
2016-04-11	2016-04-12	2016-06-16	CB2	175	crevice	f	a	1	0	0	0	0	0	50	50	0	0	0	0
2016-04-11	2016-04-12	2016-06-16	CB2	175	exposed	f	b	1	1	5	0	0	0	40	25	0	35	0	0
2016-04-11	2016-04-12	2016-06-16	CB2	175	crevice	f	c	1	1	38	0	0	0	10	90	0	0	0	0
2016-04-11	2016-04-12	2016-06-16	CB2	175	exposed	f	d	1	0	0	0	0	0	30	30	10	30	0	0
2016-04-11	2016-04-12	2016-06-16	CB2	175	crevice	f	e	1	0	0	0	0	0	7	80	5	8	0	0
2016-04-11	2016-04-12	2016-06-16	CB2	175	exposed	f	f	1	0	1	0	0	0	50	40	5	5	0	0
2016-04-11	2016-04-12	2016-06-16	CB2	175	crevice	f	g	1	0	0	0	0	0	10	70	5	15	0	0
2016-04-11	2016-04-12	2016-06-16	CB2	175	exposed	f	h	1	0	0	0	0	0	40	35	15	10	0	0
2016-04-11	2016-04-12	2016-06-16	CB2	175	crevice	f	i	1	0	0	0	0	0	50	50	0	0	0	0
2016-04-11	2016-04-12	2016-06-16	CB2	175	crevice	g	a	1	0	0	0	0	0	90	5	0	5	0	0
2016-04-11	2016-04-12	2016-06-16	CB2	175	crevice	g	b	1	1	47	0	0	0	10	85	0	5	0	0
2016-04-11	2016-04-12	2016-06-16	CB2	175	exposed	g	c	1	0	0	0	0	0	45	45	5	5	0	0
2016-04-11	2016-04-12	2016-06-16	CB2	175	crevice	g	d	1	1	29	0	0	0	10	90	0	0	0	0
2016-04-11	2016-04-12	2016-06-16	CB2	175	exposed	g	e	1	0	1	0	0	0	40	30	15	15	0	0
2016-04-11	2016-04-12	2016-06-16	CB2	175	crevice	g	f	1	1	3	0	0	0	5	95	0	0	0	0
2016-04-11	2016-04-12	2016-06-16	CB2	175	crevice	g	f	2	1	9	0	0	0	5	95	0	0	0	0
2016-04-11	2016-04-12	2016-06-16	CB2	175	crevice	g	f	3	1	4	0	0	0	5	95	0	0	0	0
2016-04-11	2016-04-12	2016-06-16	CB2	175	crevice	g	f	4	0	1	0	0	0	5	95	0	0	0	0
2016-04-11	2016-04-12	2016-06-16	CB2	175	exposed	g	g	1	0	0	0	0	0	40	25	5	30	0	0
2016-04-11	2016-04-12	2016-06-16	CB2	175	crevice	g	h	1	0	1	0	0	0	10	85	0	5	0	0
2016-04-11	2016-04-12	2016-06-16	CB2	175	crevice	g	h	2	0	1	0	0	0	10	85	0	5	0	0
2016-04-11	2016-04-12	2016-06-16	CB2	175	crevice	g	h	3	1	14	0	0	0	10	85	0	5	0	0
2016-04-11	2016-04-12	2016-06-16	CB2	175	crevice	g	i	1	0	0	0	0	0	50	50	0	0	0	0
2016-04-11	2016-04-12	2016-06-16	CB2	175	crevice	h	a	1	0	0	0	0	0	0	100	0	0	0	0
2016-04-11	2016-04-12	2016-06-16	CB2	175	exposed	h	b	1	0	1	1	1	0	80	5	10	5	0	0
2016-04-11	2016-04-12	2016-06-16	CB2	175	crevice	h	c	1	1	89	0	0	0	5	95	0	0	0	0
2016-04-11	2016-04-12	2016-06-16	CB2	175	exposed	h	d	1	0	1	0	0	0	50	10	5	35	0	0
2016-04-11	2016-04-12	2016-06-16	CB2	175	exposed	h	d	2	0	1	0	0	0	50	10	5	35	0	0
2016-04-11	2016-04-12	2016-06-16	CB2	175	crevice	h	e	1	1	87	0	0	0	0	100	0	0	0	0
2016-04-11	2016-04-12	2016-06-16	CB2	175	exposed	h	f	1	1	2	0	0	0	30	30	10	30	0	0
2016-04-11	2016-04-12	2016-06-16	CB2	175	crevice	h	g	1	1	47	0	0	0	0	90	0	10	0	0
2016-04-11	2016-04-12	2016-06-16	CB2	175	exposed	h	h	1	0	0	0	0	0	50	20	20	10	0	0
2016-04-11	2016-04-12	2016-06-16	CB2	175	crevice	h	i	1	0	0	0	0	0	0	100	0	0	0	0
2016-04-11	2016-04-12	2016-06-16	CB2	175	crevice	i	a	1	0	0	0	0	0	0	100	0	0	0	0
2016-04-11	2016-04-12	2016-06-16	CB2	175	crevice	i	b	1	0	0	0	0	0	0	100	0	0	0	0
2016-04-11	2016-04-12	2016-06-16	CB2	175	crevice	i	c	1	0	0	0	0	0	0	100	0	0	0	0
2016-04-11	2016-04-12	2016-06-16	CB2	175	crevice	i	d	1	1	25	0	0	0	0	100	0	0	0	0
2016-04-11	2016-04-12	2016-06-16	CB2	175	crevice	i	e	1	0	0	0	0	0	0	100	0	0	0	0
2016-04-11	2016-04-12	2016-06-16	CB2	175	crevice	i	f	1	0	0	0	0	0	0	100	0	0	0	0
2016-04-11	2016-04-12	2016-06-16	CB2	175	crevice	i	g	1	0	0	0	0	0	10	90	0	0	0	0
2016-04-11	2016-04-12	2016-06-16	CB2	175	crevice	i	h	1	0	0	0	0	0	0	100	0	0	0	0
2016-04-11	2016-04-12	2016-06-16	CB2	175	crevice	i	i	1	0	0	0	0	0	0	100	0	0	0	0
2016-04-10	2016-04-12	2016-05-15	ExMar2	210	crevice	a	a	1	1	22	0	0	0	100	0	0	0	0	0
2016-04-10	2016-04-12	2016-05-15	ExMar2	210	crevice	a	b	1	1	3	0	0	0	80	0	0	20	0	0
2016-04-10	2016-04-12	2016-05-15	ExMar2	210	crevice	a	c	1	0	0	0	0	0	80	0	0	20	0	0
2016-04-10	2016-04-12	2016-05-15	ExMar2	210	crevice	a	d	1	1	27	0	0	0	70	0	0	30	0	0
2016-04-10	2016-04-12	2016-05-15	ExMar2	210	crevice	a	e	1	0	0	0	0	0	80	0	0	20	0	0
2016-04-10	2016-04-12	2016-05-15	ExMar2	210	crevice	a	f	1	1	44	0	0	0	100	0	0	0	0	0
2016-04-10	2016-04-12	2016-05-15	ExMar2	210	crevice	a	g	1	0	0	0	0	0	90	0	0	10	0	0
2016-04-10	2016-04-12	2016-05-15	ExMar2	210	crevice	a	h	1	1	23	0	0	0	100	0	0	0	0	0
2016-04-10	2016-04-12	2016-05-15	ExMar2	210	crevice	a	i	1	0	0	0	0	0	100	0	0	0	0	0
2016-04-10	2016-04-12	2016-05-15	ExMar2	210	crevice	b	a	1	0	0	0	0	0	80	10	0	10	0	0
2016-04-10	2016-04-12	2016-05-15	ExMar2	210	exposed	b	b	1	1	34	0	0	0	90	0	0	10	0	0
2016-04-10	2016-04-12	2016-05-15	ExMar2	210	crevice	b	c	1	1	156	0	0	65	20	0	5	10	0	0
2016-04-10	2016-04-12	2016-05-15	ExMar2	210	exposed	b	d	1	1	110	60	1	0	60	0	0	10	0	0
2016-04-10	2016-04-12	2016-05-15	ExMar2	210	crevice	b	e	1	1	104	1	1	10	25	0	60	5	0	0
2016-04-10	2016-04-12	2016-05-15	ExMar2	210	exposed	b	f	1	1	31	0	0	10	70	5	0	15	0	0
2016-04-10	2016-04-12	2016-05-15	ExMar2	210	exposed	b	f	2	0	1	0	0	10	70	5	0	15	0	0
2016-04-10	2016-04-12	2016-05-15	ExMar2	210	exposed	b	f	3	0	1	0	0	10	70	5	0	15	0	0
2016-04-10	2016-04-12	2016-05-15	ExMar2	210	exposed	b	f	4	0	1	0	0	10	70	5	0	15	0	0
2016-04-10	2016-04-12	2016-05-15	ExMar2	210	crevice	b	g	1	1	146	0	0	5	85	0	0	10	0	0
2016-04-10	2016-04-12	2016-05-15	ExMar2	210	exposed	b	h	1	0	1	0	0	25	35	10	0	30	0	0
2016-04-10	2016-04-12	2016-05-15	ExMar2	210	crevice	b	i	1	1	10	0	0	10	80	0	0	10	0	0
2016-04-10	2016-04-12	2016-05-15	ExMar2	210	crevice	c	a	1	0	0	0	0	0	100	0	0	0	0	0
2016-04-10	2016-04-12	2016-05-15	ExMar2	210	crevice	c	b	1	1	16	0	0	0	75	5	15	5	0	0
2016-04-10	2016-04-12	2016-05-15	ExMar2	210	crevice	c	b	2	1	9	0	0	0	75	5	15	5	0	0
2016-04-10	2016-04-12	2016-05-15	ExMar2	210	crevice	c	b	3	0	1	1	1	0	75	5	15	5	0	0
2016-04-10	2016-04-12	2016-05-15	ExMar2	210	crevice	c	b	4	0	1	0	0	0	75	5	15	5	0	0
2016-04-10	2016-04-12	2016-05-15	ExMar2	210	crevice	c	b	5	1	9	0	0	0	75	5	15	5	0	0
2016-04-10	2016-04-12	2016-05-15	ExMar2	210	exposed	c	c	1	1	43	0	0	5	80	0	0	15	0	0
2016-04-10	2016-04-12	2016-05-15	ExMar2	210	crevice	c	d	1	0	1	0	0	25	40	0	10	25	0	0
2016-04-10	2016-04-12	2016-05-15	ExMar2	210	crevice	c	d	2	0	1	1	1	25	40	0	10	25	0	0
2016-04-10	2016-04-12	2016-05-15	ExMar2	210	crevice	c	d	3	0	1	1	1	25	40	0	10	25	0	0
2016-04-10	2016-04-12	2016-05-15	ExMar2	210	crevice	c	d	4	1	2	1	1	25	40	0	10	25	0	0
2016-04-10	2016-04-12	2016-05-15	ExMar2	210	crevice	c	d	5	0	1	0	0	25	40	0	10	25	0	0
2016-04-10	2016-04-12	2016-05-15	ExMar2	210	crevice	c	d	6	0	1	0	0	25	40	0	10	25	0	0
2016-04-10	2016-04-12	2016-05-15	ExMar2	210	crevice	c	d	7	0	1	0	0	25	40	0	10	25	0	0
2016-04-10	2016-04-12	2016-05-15	ExMar2	210	exposed	c	e	1	0	1	1	1	10	65	0	5	20	0	0
2016-04-10	2016-04-12	2016-05-15	ExMar2	210	exposed	c	e	2	1	2	1	1	10	65	0	5	20	0	0
2016-04-10	2016-04-12	2016-05-15	ExMar2	210	crevice	c	f	1	0	0	0	0	50	25	0	0	25	0	0
2016-04-10	2016-04-12	2016-05-15	ExMar2	210	exposed	c	g	1	0	1	1	1	20	50	10	0	20	0	0
2016-04-10	2016-04-12	2016-05-15	ExMar2	210	exposed	c	g	2	0	1	0	0	20	50	10	0	20	0	0
2016-04-10	2016-04-12	2016-05-15	ExMar2	210	exposed	c	g	3	1	3	0	0	20	50	10	0	20	0	0
2016-04-10	2016-04-12	2016-05-15	ExMar2	210	crevice	c	h	1	0	0	0	0	45	30	10	0	15	0	0
2016-04-10	2016-04-12	2016-05-15	ExMar2	210	crevice	c	i	1	0	0	0	0	20	60	0	0	20	0	0
2016-04-10	2016-04-12	2016-05-15	ExMar2	210	crevice	d	a	1	1	4	0	0	0	30	30	40	0	0	0
2016-04-10	2016-04-12	2016-05-15	ExMar2	210	exposed	d	b	1	1	24	17	1	15	80	0	0	5	0	0
2016-04-10	2016-04-12	2016-05-15	ExMar2	210	crevice	d	c	1	1	5	5	1	0	75	0	0	20	0	5
2016-04-10	2016-04-12	2016-05-15	ExMar2	210	crevice	d	c	2	1	3	3	1	0	75	0	0	20	0	5
2016-04-10	2016-04-12	2016-05-15	ExMar2	210	exposed	d	d	1	0	1	1	1	5	90	0	0	5	0	0
2016-04-10	2016-04-12	2016-05-15	ExMar2	210	exposed	d	d	2	0	1	1	1	5	90	0	0	5	0	0
2016-04-10	2016-04-12	2016-05-15	ExMar2	210	exposed	d	d	3	0	1	1	1	5	90	0	0	5	0	0
2016-04-10	2016-04-12	2016-05-15	ExMar2	210	exposed	d	d	4	0	1	0	0	5	90	0	0	5	0	0
2016-04-10	2016-04-12	2016-05-15	ExMar2	210	exposed	d	d	5	0	1	0	0	5	90	0	0	5	0	0
2016-04-10	2016-04-12	2016-05-15	ExMar2	210	exposed	d	d	6	0	1	0	0	5	90	0	0	5	0	0
2016-04-10	2016-04-12	2016-05-15	ExMar2	210	exposed	d	d	7	0	1	0	0	5	90	0	0	5	0	0
2016-04-10	2016-04-12	2016-05-15	ExMar2	210	crevice	d	e	1	0	0	0	0	40	40	0	0	20	0	0
2016-04-10	2016-04-12	2016-05-15	ExMar2	210	exposed	d	f	1	0	0	0	0	5	75	0	0	20	0	0
2016-04-10	2016-04-12	2016-05-15	ExMar2	210	crevice	d	g	1	0	0	0	0	30	60	0	0	10	0	0
2016-04-10	2016-04-12	2016-05-15	ExMar2	210	exposed	d	h	1	0	0	0	0	40	30	0	0	30	0	0
2016-04-10	2016-04-12	2016-05-15	ExMar2	210	crevice	d	i	1	0	0	0	0	10	50	0	0	40	0	0
2016-04-10	2016-04-12	2016-05-15	ExMar2	210	crevice	e	a	1	0	0	0	0	0	80	10	0	10	0	0
2016-04-10	2016-04-12	2016-05-15	ExMar2	210	crevice	e	b	1	1	2	2	1	15	50	10	10	15	0	0
2016-04-10	2016-04-12	2016-05-15	ExMar2	210	crevice	e	b	2	1	2	0	0	15	50	10	10	15	0	0
2016-04-10	2016-04-12	2016-05-15	ExMar2	210	crevice	e	b	3	1	3	0	0	15	50	10	10	15	0	0
2016-04-10	2016-04-12	2016-05-15	ExMar2	210	crevice	e	b	4	1	10	6	1	15	50	10	10	15	0	0
2016-04-10	2016-04-12	2016-05-15	ExMar2	210	crevice	e	b	5	1	3	0	0	15	50	10	10	15	0	0
2016-04-10	2016-04-12	2016-05-15	ExMar2	210	crevice	e	b	6	0	1	0	0	15	50	10	10	15	0	0
2016-04-10	2016-04-12	2016-05-15	ExMar2	210	crevice	e	b	7	0	1	1	1	15	50	10	10	15	0	0
2016-04-10	2016-04-12	2016-05-15	ExMar2	210	crevice	e	b	8	1	2	2	1	15	50	10	10	15	0	0
2016-04-10	2016-04-12	2016-05-15	ExMar2	210	crevice	e	b	9	0	1	1	1	15	50	10	10	15	0	0
2016-04-10	2016-04-12	2016-05-15	ExMar2	210	exposed	e	c	1	0	1	0	0	5	85	5	0	5	0	0
2016-04-10	2016-04-12	2016-05-15	ExMar2	210	crevice	e	d	1	0	0	0	0	15	65	0	0	20	0	0
2016-04-10	2016-04-12	2016-05-15	ExMar2	210	crevice	e	f	1	0	0	0	0	10	40	10	0	40	0	0
2016-04-10	2016-04-12	2016-05-15	ExMar2	210	exposed	e	g	1	0	0	0	0	5	50	0	0	45	0	0
2016-04-10	2016-04-12	2016-05-15	ExMar2	210	crevice	e	h	1	0	0	0	0	25	40	0	0	25	10	0
2016-04-10	2016-04-12	2016-05-15	ExMar2	210	crevice	e	i	1	0	0	0	0	0	50	0	0	0	50	0
2016-04-10	2016-04-12	2016-05-15	ExMar2	210	crevice	f	a	1	1	19	0	0	0	100	0	0	0	0	0
2016-04-10	2016-04-12	2016-05-15	ExMar2	210	exposed	f	b	1	0	0	0	0	5	75	15	0	5	0	0
2016-04-10	2016-04-12	2016-05-15	ExMar2	210	crevice	f	c	1	0	0	0	0	30	50	0	15	5	0	0
2016-04-10	2016-04-12	2016-05-15	ExMar2	210	exposed	f	d	1	0	0	0	0	10	80	0	0	10	0	0
2016-04-10	2016-04-12	2016-05-15	ExMar2	210	crevice	f	e	1	0	0	0	0	40	50	0	0	10	0	0
2016-04-10	2016-04-12	2016-05-15	ExMar2	210	exposed	f	f	1	0	0	0	0	10	70	0	0	20	0	0
2016-04-10	2016-04-12	2016-05-15	ExMar2	210	crevice	f	g	1	0	0	0	0	35	50	0	0	15	0	0
2016-04-10	2016-04-12	2016-05-15	ExMar2	210	exposed	f	h	1	0	0	0	0	20	50	0	0	30	0	0
2016-04-10	2016-04-12	2016-05-15	ExMar2	210	crevice	f	i	1	0	0	0	0	0	100	0	0	0	0	0
2016-04-10	2016-04-12	2016-05-15	ExMar2	210	crevice	g	a	1	0	0	0	0	0	95	0	0	5	0	0
2016-04-10	2016-04-12	2016-05-15	ExMar2	210	crevice	g	b	1	1	3	3	1	5	60	10	20	5	0	0
2016-04-10	2016-04-12	2016-05-15	ExMar2	210	crevice	g	b	2	1	2	2	1	5	60	10	20	5	0	0
2016-04-10	2016-04-12	2016-05-15	ExMar2	210	crevice	g	b	3	1	9	6	1	5	60	10	20	5	0	0
2016-04-10	2016-04-12	2016-05-15	ExMar2	210	crevice	g	b	4	0	1	0	0	5	60	10	20	5	0	0
2016-04-10	2016-04-12	2016-05-15	ExMar2	210	crevice	g	b	5	1	6	0	0	5	60	10	20	5	0	0
2016-04-10	2016-04-12	2016-05-15	ExMar2	210	crevice	g	b	6	0	1	0	0	5	60	10	20	5	0	0
2016-04-10	2016-04-12	2016-05-15	ExMar2	210	crevice	g	b	7	0	1	0	0	5	60	10	20	5	0	0
2016-04-10	2016-04-12	2016-05-15	ExMar2	210	exposed	g	c	1	0	1	0	0	5	90	0	0	5	0	0
2016-04-10	2016-04-12	2016-05-15	ExMar2	210	crevice	g	d	1	0	0	0	0	70	5	0	20	5	0	0
2016-04-10	2016-04-12	2016-05-15	ExMar2	210	exposed	g	e	1	0	0	0	0	5	80	5	5	5	0	0
2016-04-10	2016-04-12	2016-05-15	ExMar2	210	crevice	g	f	1	0	0	0	0	20	5	20	50	5	0	0
2016-04-10	2016-04-12	2016-05-15	ExMar2	210	exposed	g	g	1	0	0	0	0	5	85	0	0	10	0	0
2016-04-10	2016-04-12	2016-05-15	ExMar2	210	crevice	g	h	1	0	0	0	0	10	85	0	0	5	0	0
2016-04-10	2016-04-12	2016-05-15	ExMar2	210	crevice	g	i	1	0	0	0	0	10	85	0	0	5	0	0
2016-04-10	2016-04-12	2016-05-15	ExMar2	210	crevice	h	a	1	1	16	0	0	0	100	0	0	0	0	0
2016-04-10	2016-04-12	2016-05-15	ExMar2	210	exposed	h	b	1	0	0	0	0	0	95	0	0	5	0	0
2016-04-10	2016-04-12	2016-05-15	ExMar2	210	crevice	h	c	1	1	6	6	1	5	85	0	0	10	0	0
2016-04-10	2016-04-12	2016-05-15	ExMar2	210	crevice	h	c	2	1	3	0	0	5	85	0	0	10	0	0
2016-04-10	2016-04-12	2016-05-15	ExMar2	210	crevice	h	c	3	0	1	0	0	5	85	0	0	10	0	0
2016-04-10	2016-04-12	2016-05-15	ExMar2	210	crevice	h	c	4	0	1	0	0	5	85	0	0	10	0	0
2016-04-10	2016-04-12	2016-05-15	ExMar2	210	crevice	h	c	5	0	1	1	1	5	85	0	0	10	0	0
2016-04-10	2016-04-12	2016-05-15	ExMar2	210	exposed	h	d	1	0	0	0	0	0	95	0	0	5	0	0
2016-04-10	2016-04-12	2016-05-15	ExMar2	210	crevice	h	e	1	0	0	0	0	10	70	5	10	5	0	0
2016-04-10	2016-04-12	2016-05-15	ExMar2	210	exposed	h	f	1	0	0	0	0	5	90	0	0	5	0	0
2016-04-10	2016-04-12	2016-05-15	ExMar2	210	crevice	h	g	1	0	0	0	0	5	80	0	5	10	0	0
2016-04-10	2016-04-12	2016-05-15	ExMar2	210	exposed	h	h	1	0	0	0	0	10	65	5	0	20	0	0
2016-04-10	2016-04-12	2016-05-15	ExMar2	210	crevice	h	i	1	0	0	0	0	0	80	0	0	20	0	0
2016-04-10	2016-04-12	2016-05-15	ExMar2	210	crevice	i	a	1	0	0	0	0	0	85	0	0	15	0	0
2016-04-10	2016-04-12	2016-05-15	ExMar2	210	crevice	i	b	1	0	0	0	0	0	85	0	0	15	0	0
2016-04-10	2016-04-12	2016-05-15	ExMar2	210	crevice	i	c	1	0	0	0	0	0	85	0	0	15	0	0
2016-04-10	2016-04-12	2016-05-15	ExMar2	210	crevice	i	d	1	0	0	0	0	0	85	0	0	15	0	0
2016-04-10	2016-04-12	2016-05-15	ExMar2	210	crevice	i	e	1	0	0	0	0	0	85	0	0	15	0	0
2016-04-10	2016-04-12	2016-05-15	ExMar2	210	crevice	i	f	1	0	0	0	0	0	85	0	0	15	0	0
2016-04-10	2016-04-12	2016-05-15	ExMar2	210	crevice	i	g	1	0	0	0	0	0	85	0	0	15	0	0
2016-04-10	2016-04-12	2016-05-15	ExMar2	210	crevice	i	h	1	0	0	0	0	0	85	0	0	15	0	0
2016-04-10	2016-04-12	2016-05-15	ExMar2	210	crevice	i	i	1	0	0	0	0	0	85	0	0	15	0	0
2016-04-10	2016-04-12	2016-05-15	ExMar2	211	crevice	a	a	1	0	0	0	0	0	50	0	50	0	0	0
2016-04-10	2016-04-12	2016-05-15	ExMar2	211	crevice	a	b	1	1	63	0	0	0	80	0	10	10	0	0
2016-04-10	2016-04-12	2016-05-15	ExMar2	211	crevice	a	c	1	0	0	0	0	0	40	0	10	50	0	0
2016-04-10	2016-04-12	2016-05-15	ExMar2	211	crevice	a	d	1	1	24	0	0	0	100	0	0	0	0	0
2016-04-10	2016-04-12	2016-05-15	ExMar2	211	crevice	a	e	1	0	0	0	0	0	70	0	10	10	10	0
2016-04-10	2016-04-12	2016-05-15	ExMar2	211	crevice	a	f	1	1	35	0	0	0	20	10	50	20	0	0
2016-04-10	2016-04-12	2016-05-15	ExMar2	211	crevice	a	g	1	0	0	0	0	0	20	0	50	30	0	0
2016-04-10	2016-04-12	2016-05-15	ExMar2	211	crevice	a	h	1	1	20	0	0	0	20	0	50	30	0	0
2016-04-10	2016-04-12	2016-05-15	ExMar2	211	crevice	a	i	1	0	0	0	0	0	20	0	50	30	0	0
2016-04-10	2016-04-12	2016-05-15	ExMar2	211	crevice	b	a	1	1	3	0	0	10	60	10	10	10	0	0
2016-04-10	2016-04-12	2016-05-15	ExMar2	211	crevice	b	a	2	0	1	0	0	10	60	10	10	10	0	0
2016-04-10	2016-04-12	2016-05-15	ExMar2	211	crevice	b	a	3	0	1	0	0	10	60	10	10	10	0	0
2016-04-10	2016-04-12	2016-05-15	ExMar2	211	exposed	b	b	1	1	71	0	0	0	70	0	20	10	0	0
2016-04-10	2016-04-12	2016-05-15	ExMar2	211	crevice	b	c	1	1	117	0	0	5	10	10	60	15	0	0
2016-04-10	2016-04-12	2016-05-15	ExMar2	211	exposed	b	d	1	1	5	5	1	0	90	0	0	7	0	0
2016-04-10	2016-04-12	2016-05-15	ExMar2	211	exposed	b	d	2	1	21	0	0	0	90	0	0	7	0	0
2016-04-10	2016-04-12	2016-05-15	ExMar2	211	crevice	b	e	1	1	119	0	0	40	30	10	10	5	0	5
2016-04-10	2016-04-12	2016-05-15	ExMar2	211	exposed	b	f	1	1	58	0	0	0	75	10	10	5	0	0
2016-04-10	2016-04-12	2016-05-15	ExMar2	211	crevice	b	g	1	1	139	0	0	5	5	5	85	0	0	0
2016-04-10	2016-04-12	2016-05-15	ExMar2	211	exposed	b	h	1	1	40	0	0	5	35	5	45	5	5	0
2016-04-10	2016-04-12	2016-05-15	ExMar2	211	exposed	b	h	2	1	4	0	0	5	35	5	45	5	5	0
2016-04-10	2016-04-12	2016-05-15	ExMar2	211	crevice	b	i	1	0	0	0	0	0	50	0	50	0	0	0
2016-04-10	2016-04-12	2016-05-15	ExMar2	211	crevice	c	a	1	0	0	0	0	0	50	0	50	0	0	0
2016-04-10	2016-04-12	2016-05-15	ExMar2	211	crevice	c	b	1	1	41	0	0	20	30	10	30	10	0	0
2016-04-10	2016-04-12	2016-05-15	ExMar2	211	exposed	c	c	1	0	1	0	0	0	60	25	5	10	0	0
2016-04-10	2016-04-12	2016-05-15	ExMar2	211	exposed	c	c	2	0	1	0	0	0	60	25	5	10	0	0
2016-04-10	2016-04-12	2016-05-15	ExMar2	211	exposed	c	c	3	1	3	0	0	0	60	25	5	10	0	0
2016-04-10	2016-04-12	2016-05-15	ExMar2	211	exposed	c	c	4	1	8	0	0	0	60	25	5	10	0	0
2016-04-10	2016-04-12	2016-05-15	ExMar2	211	crevice	c	d	1	1	61	0	0	10	40	15	30	5	0	0
2016-04-10	2016-04-12	2016-05-15	ExMar2	211	exposed	c	e	1	1	71	0	0	3	55	5	35	2	0	0
2016-04-10	2016-04-12	2016-05-15	ExMar2	211	crevice	c	f	1	1	29	0	0	60	15	5	15	5	0	0
2016-04-10	2016-04-12	2016-05-15	ExMar2	211	crevice	c	f	2	0	1	1	1	60	15	5	15	5	0	0
2016-04-10	2016-04-12	2016-05-15	ExMar2	211	crevice	c	f	3	0	1	1	1	60	15	5	15	5	0	0
2016-04-10	2016-04-12	2016-05-15	ExMar2	211	exposed	c	g	1	1	45	20	1	5	70	5	5	5	0	0
2016-04-10	2016-04-12	2016-05-15	ExMar2	211	crevice	c	h	1	1	30	0	0	20	20	15	40	5	0	0
2016-04-10	2016-04-12	2016-05-15	ExMar2	211	crevice	c	h	2	1	2	0	0	20	20	15	40	5	0	0
2016-04-10	2016-04-12	2016-05-15	ExMar2	211	crevice	c	h	3	1	3	0	0	20	20	15	40	5	0	0
2016-04-10	2016-04-12	2016-05-15	ExMar2	211	crevice	c	i	1	0	0	0	0	0	5	20	75	0	0	0
2016-04-10	2016-04-12	2016-05-15	ExMar2	211	crevice	d	a	1	1	7	0	0	20	60	10	0	10	0	0
2016-04-10	2016-04-12	2016-05-15	ExMar2	211	exposed	d	b	1	1	4	0	0	5	80	5	5	0	5	0
2016-04-10	2016-04-12	2016-05-15	ExMar2	211	crevice	d	c	1	1	2	0	0	20	20	10	10	40	0	0
2016-04-10	2016-04-12	2016-05-15	ExMar2	211	exposed	d	d	1	1	4	0	0	0	95	0	0	5	0	0
2016-04-10	2016-04-12	2016-05-15	ExMar2	211	exposed	d	d	2	0	1	0	0	0	95	0	0	5	0	0
2016-04-10	2016-04-12	2016-05-15	ExMar2	211	exposed	d	d	3	0	1	0	0	0	95	0	0	5	0	0
2016-04-10	2016-04-12	2016-05-15	ExMar2	211	exposed	d	d	4	0	1	0	0	0	95	0	0	5	0	0
2016-04-10	2016-04-12	2016-05-15	ExMar2	211	crevice	d	e	1	0	1	0	0	50	20	5	10	15	0	0
2016-04-10	2016-04-12	2016-05-15	ExMar2	211	crevice	d	e	2	0	1	1	1	50	20	5	10	15	0	0
2016-04-10	2016-04-12	2016-05-15	ExMar2	211	exposed	d	f	1	1	5	0	0	0	90	5	0	5	0	0
2016-04-10	2016-04-12	2016-05-15	ExMar2	211	exposed	d	f	2	1	6	0	0	0	90	5	0	5	0	0
2016-04-10	2016-04-12	2016-05-15	ExMar2	211	crevice	d	g	1	1	3	0	0	25	30	10	20	15	0	0
2016-04-10	2016-04-12	2016-05-15	ExMar2	211	crevice	d	g	2	0	1	0	0	25	30	10	20	15	0	0
2016-04-10	2016-04-12	2016-05-15	ExMar2	211	crevice	d	g	3	0	1	0	0	25	30	10	20	15	0	0
2016-04-10	2016-04-12	2016-05-15	ExMar2	211	crevice	d	g	4	0	1	0	0	25	30	10	20	15	0	0
2016-04-10	2016-04-12	2016-05-15	ExMar2	211	crevice	d	g	5	0	1	0	0	25	30	10	20	15	0	0
2016-04-10	2016-04-12	2016-05-15	ExMar2	211	crevice	d	g	6	1	8	0	0	25	30	10	20	15	0	0
2016-04-10	2016-04-12	2016-05-15	ExMar2	211	exposed	d	h	1	0	0	0	0	5	65	5	20	5	0	0
2016-04-10	2016-04-12	2016-05-15	ExMar2	211	crevice	d	i	1	1	3	0	0	0	30	10	50	10	0	0
2016-04-10	2016-04-12	2016-05-15	ExMar2	211	crevice	e	a	1	0	0	0	0	0	80	0	0	20	0	0
2016-04-10	2016-04-12	2016-05-15	ExMar2	211	crevice	e	b	1	0	0	0	0	50	40	5	0	5	0	0
2016-04-10	2016-04-12	2016-05-15	ExMar2	211	exposed	e	c	1	0	1	1	1	10	85	0	0	5	0	0
2016-04-10	2016-04-12	2016-05-15	ExMar2	211	crevice	e	d	1	0	0	0	0	80	10	0	0	10	0	0
2016-04-10	2016-04-12	2016-05-15	ExMar2	211	crevice	e	f	1	0	0	0	0	60	20	5	10	5	0	0
2016-04-10	2016-04-12	2016-05-15	ExMar2	211	exposed	e	g	1	1	9	0	0	5	75	5	5	10	0	0
2016-04-10	2016-04-12	2016-05-15	ExMar2	211	exposed	e	g	2	0	1	1	1	5	75	5	5	10	0	0
2016-04-10	2016-04-12	2016-05-15	ExMar2	211	exposed	e	g	3	0	1	1	1	5	75	5	5	10	0	0
2016-04-10	2016-04-12	2016-05-15	ExMar2	211	crevice	e	h	1	1	64	13	1	15	15	20	40	10	0	0
2016-04-10	2016-04-12	2016-05-15	ExMar2	211	crevice	e	i	1	0	0	0	0	0	60	35	0	5	0	0
2016-04-10	2016-04-12	2016-05-15	ExMar2	211	crevice	f	a	1	0	0	0	0	0	80	10	0	10	0	0
2016-04-10	2016-04-12	2016-05-15	ExMar2	211	exposed	f	b	1	0	0	0	0	5	90	0	0	5	0	0
2016-04-10	2016-04-12	2016-05-15	ExMar2	211	crevice	f	c	1	0	0	0	0	60	20	10	5	5	0	0
2016-04-10	2016-04-12	2016-05-15	ExMar2	211	exposed	f	d	1	0	0	0	0	0	95	0	0	5	0	0
2016-04-10	2016-04-12	2016-05-15	ExMar2	211	crevice	f	e	1	0	0	0	0	60	25	5	0	10	0	0
2016-04-10	2016-04-12	2016-05-15	ExMar2	211	exposed	f	f	1	0	0	0	0	5	80	5	5	5	0	0
2016-04-10	2016-04-12	2016-05-15	ExMar2	211	crevice	f	g	1	0	0	0	0	60	10	5	20	5	0	0
2016-04-10	2016-04-12	2016-05-15	ExMar2	211	exposed	f	h	1	1	5	1	1	0	65	10	15	5	0	0
2016-04-10	2016-04-12	2016-05-15	ExMar2	211	exposed	f	h	2	0	1	1	1	0	65	10	15	5	0	0
2016-04-10	2016-04-12	2016-05-15	ExMar2	211	exposed	f	h	3	0	1	1	1	0	65	10	15	5	0	0
2016-04-10	2016-04-12	2016-05-15	ExMar2	211	exposed	f	h	4	0	1	1	1	0	65	10	15	5	0	0
2016-04-10	2016-04-12	2016-05-15	ExMar2	211	exposed	f	h	5	1	18	2	1	0	65	10	15	5	0	0
2016-04-10	2016-04-12	2016-05-15	ExMar2	211	crevice	f	i	1	1	5	0	0	0	80	0	0	20	0	0
2016-04-10	2016-04-12	2016-05-15	ExMar2	211	crevice	g	a	1	0	0	0	0	20	50	0	0	30	0	0
2016-04-10	2016-04-12	2016-05-15	ExMar2	211	crevice	g	b	1	0	0	0	0	30	25	15	5	25	0	0
2016-04-10	2016-04-12	2016-05-15	ExMar2	211	exposed	g	c	1	0	0	0	0	5	85	0	0	10	0	0
2016-04-10	2016-04-12	2016-05-15	ExMar2	211	crevice	g	d	1	0	0	0	0	60	20	5	10	5	0	0
2016-04-10	2016-04-12	2016-05-15	ExMar2	211	exposed	g	e	1	0	0	0	0	5	80	0	0	15	0	0
2016-04-10	2016-04-12	2016-05-15	ExMar2	211	crevice	g	f	1	0	0	0	0	70	5	15	5	5	0	0
2016-04-10	2016-04-12	2016-05-15	ExMar2	211	exposed	g	g	1	0	1	0	0	10	70	10	0	10	0	0
2016-04-10	2016-04-12	2016-05-15	ExMar2	211	crevice	g	h	1	1	58	0	0	20	25	5	40	10	0	0
2016-04-10	2016-04-12	2016-05-15	ExMar2	211	crevice	g	i	1	0	0	0	0	10	45	15	15	15	0	0
2016-04-10	2016-04-12	2016-05-15	ExMar2	211	crevice	h	a	1	0	0	0	0	20	40	20	0	20	0	0
2016-04-10	2016-04-12	2016-05-15	ExMar2	211	exposed	h	b	1	0	0	0	0	10	70	10	0	10	0	0
2016-04-10	2016-04-12	2016-05-15	ExMar2	211	crevice	h	c	1	0	0	0	0	50	40	0	0	10	0	0
2016-04-10	2016-04-12	2016-05-15	ExMar2	211	exposed	h	d	1	0	0	0	0	10	80	0	0	10	0	0
2016-04-10	2016-04-12	2016-05-15	ExMar2	211	crevice	h	e	1	0	1	0	0	35	10	35	5	5	10	0
2016-04-10	2016-04-12	2016-05-15	ExMar2	211	crevice	h	e	2	1	9	3	1	35	10	35	5	5	10	0
2016-04-10	2016-04-12	2016-05-15	ExMar2	211	exposed	h	f	1	0	0	0	0	0	65	5	10	5	15	0
2016-04-10	2016-04-12	2016-05-15	ExMar2	211	crevice	h	g	1	1	27	0	0	35	30	5	20	5	0	5
2016-04-10	2016-04-12	2016-05-15	ExMar2	211	exposed	h	h	1	1	36	3	1	10	60	25	0	5	0	0
2016-04-10	2016-04-12	2016-05-15	ExMar2	211	exposed	h	h	2	0	1	1	1	10	60	25	0	5	0	0
2016-04-10	2016-04-12	2016-05-15	ExMar2	211	exposed	h	h	3	0	1	1	1	10	60	25	0	5	0	0
2016-04-10	2016-04-12	2016-05-15	ExMar2	211	crevice	h	i	1	1	11	0	0	50	50	0	0	0	0	0
2016-04-10	2016-04-12	2016-05-15	ExMar2	211	crevice	i	a	1	0	1	0	0	25	25	50	0	0	0	0
2016-04-10	2016-04-12	2016-05-15	ExMar2	211	crevice	i	a	2	0	1	1	1	25	25	50	0	0	0	0
2016-04-10	2016-04-12	2016-05-15	ExMar2	211	crevice	i	b	1	0	0	0	0	0	0	100	0	0	0	0
2016-04-10	2016-04-12	2016-05-15	ExMar2	211	crevice	i	c	1	0	0	0	0	25	50	0	0	25	0	0
2016-04-10	2016-04-12	2016-05-15	ExMar2	211	crevice	i	d	1	0	0	0	0	25	50	0	0	25	0	0
2016-04-10	2016-04-12	2016-05-15	ExMar2	211	crevice	i	e	1	0	0	0	0	25	50	0	0	25	0	0
2016-04-10	2016-04-12	2016-05-15	ExMar2	211	crevice	i	f	1	0	0	0	0	25	50	0	0	25	0	0
2016-04-10	2016-04-12	2016-05-15	ExMar2	211	crevice	i	g	1	0	0	0	0	25	50	0	0	25	0	0
2016-04-10	2016-04-12	2016-05-15	ExMar2	211	crevice	i	h	1	1	21	0	0	25	50	0	0	25	0	0
2016-04-10	2016-04-12	2016-05-15	ExMar2	211	crevice	i	i	1	0	0	0	0	25	50	0	0	25	0	0
2016-04-10	2016-04-12	2016-05-15	ExMar2	212	crevice	a	a	1	0	0	0	0	0	0	0	0	0	100	0
2016-04-10	2016-04-12	2016-05-15	ExMar2	212	crevice	a	b	1	0	0	0	0	0	0	0	0	0	100	0
2016-04-10	2016-04-12	2016-05-15	ExMar2	212	crevice	a	c	1	0	0	0	0	0	20	20	0	0	60	0
2016-04-10	2016-04-12	2016-05-15	ExMar2	212	crevice	a	d	1	1	18	0	0	0	40	60	0	0	0	0
2016-04-10	2016-04-12	2016-05-15	ExMar2	212	crevice	a	d	2	1	14	0	0	0	40	60	0	0	0	0
2016-04-10	2016-04-12	2016-05-15	ExMar2	212	crevice	a	e	1	0	0	0	0	10	10	40	0	0	40	0
2016-04-10	2016-04-12	2016-05-15	ExMar2	212	crevice	a	f	1	0	0	0	0	0	0	0	0	0	100	0
2016-04-10	2016-04-12	2016-05-15	ExMar2	212	crevice	a	g	1	0	1	1	1	0	20	0	0	20	60	0
2016-04-10	2016-04-12	2016-05-15	ExMar2	212	crevice	a	h	1	0	0	0	0	0	0	0	0	0	100	0
2016-04-10	2016-04-12	2016-05-15	ExMar2	212	crevice	a	i	1	0	0	0	0	0	0	0	0	0	100	0
2016-04-10	2016-04-12	2016-05-15	ExMar2	212	crevice	b	a	1	1	39	0	0	0	0	0	0	0	100	0
2016-04-10	2016-04-12	2016-05-15	ExMar2	212	exposed	b	b	1	0	1	0	0	30	30	20	0	10	10	0
2016-04-10	2016-04-12	2016-05-15	ExMar2	212	crevice	b	c	1	1	4	0	0	35	5	5	30	5	20	0
2016-04-10	2016-04-12	2016-05-15	ExMar2	212	crevice	b	c	2	1	8	0	0	35	5	5	30	5	20	0
2016-04-10	2016-04-12	2016-05-15	ExMar2	212	crevice	b	c	3	0	1	0	0	35	5	5	30	5	20	0
2016-04-10	2016-04-12	2016-05-15	ExMar2	212	crevice	b	c	4	0	1	0	0	35	5	5	30	5	20	0
2016-04-10	2016-04-12	2016-05-15	ExMar2	212	crevice	b	c	5	0	1	0	0	35	5	5	30	5	20	0
2016-04-10	2016-04-12	2016-05-15	ExMar2	212	crevice	b	c	6	1	3	0	0	35	5	5	30	5	20	0
2016-04-10	2016-04-12	2016-05-15	ExMar2	212	crevice	b	c	7	0	1	0	0	35	5	5	30	5	20	0
2016-04-10	2016-04-12	2016-05-15	ExMar2	212	exposed	b	d	1	0	1	0	0	10	70	5	0	15	0	0
2016-04-10	2016-04-12	2016-05-15	ExMar2	212	crevice	b	e	1	1	3	0	0	10	15	0	70	5	0	0
2016-04-10	2016-04-12	2016-05-15	ExMar2	212	crevice	b	e	2	0	1	0	0	10	15	0	70	5	0	0
2016-04-10	2016-04-12	2016-05-15	ExMar2	212	crevice	b	e	3	0	1	0	0	10	15	0	70	5	0	0
2016-04-10	2016-04-12	2016-05-15	ExMar2	212	crevice	b	e	4	1	2	0	0	10	15	0	70	5	0	0
2016-04-10	2016-04-12	2016-05-15	ExMar2	212	crevice	b	e	5	1	6	0	0	10	15	0	70	5	0	0
2016-04-10	2016-04-12	2016-05-15	ExMar2	212	crevice	b	e	6	1	2	0	0	10	15	0	70	5	0	0
2016-04-10	2016-04-12	2016-05-15	ExMar2	212	crevice	b	e	7	0	1	0	0	10	15	0	70	5	0	0
2016-04-10	2016-04-12	2016-05-15	ExMar2	212	exposed	b	f	1	0	0	0	0	5	80	0	0	10	5	0
2016-04-10	2016-04-12	2016-05-15	ExMar2	212	crevice	b	g	1	0	1	0	0	10	5	0	75	5	5	0
2016-04-10	2016-04-12	2016-05-15	ExMar2	212	crevice	b	g	1	1	2	0	0	10	5	0	75	5	5	0
2016-04-10	2016-04-12	2016-05-15	ExMar2	212	crevice	b	g	1	0	1	0	0	10	5	0	75	5	5	0
2016-04-10	2016-04-12	2016-05-15	ExMar2	212	crevice	b	g	1	0	1	1	1	10	5	0	75	5	5	0
2016-04-10	2016-04-12	2016-05-15	ExMar2	212	exposed	b	h	1	0	1	0	0	5	70	0	0	10	15	0
2016-04-10	2016-04-12	2016-05-15	ExMar2	212	crevice	b	i	1	1	13	10	1	0	10	50	0	20	20	0
2016-04-10	2016-04-12	2016-05-15	ExMar2	212	crevice	c	a	1	0	0	0	0	0	80	10	10	0	0	0
2016-04-10	2016-04-12	2016-05-15	ExMar2	212	crevice	c	b	1	1	5	0	0	20	20	10	40	10	0	0
2016-04-10	2016-04-12	2016-05-15	ExMar2	212	crevice	c	b	2	0	1	0	0	20	20	10	40	10	0	0
2016-04-10	2016-04-12	2016-05-15	ExMar2	212	crevice	c	b	3	1	2	0	0	20	20	10	40	10	0	0
[truncated: 959 more rows]
